# Supplementary material for: A mechanistic investigation into N-heterocyclic carbene (NHC) catalyzed umpolung of ketones and benzonitriles: is the cyano group better than the classical carbonyl group for the addition of NHC?
Source: Royal Society of Chemistry journal article supplement (doi:10.1039/c8qo01309h), 2019-01-01
Supplement: c8qo01309h1.pdf [file c8qo01309h1.pdf]

## Supporting Information

# **A mechanistic investigation into N-heterocyclic carbene (NHC) catalyzed umpolung of ketones and benzonitriles: Is cyano group better than a classical carbonyl group for the addition of NHC?**

Shanshan Cao, HaiYan Yuan\*, JingPing Zhang\*

Jilin Province Key Laboratory of Organic Functional Molecular Design & Synthesis,  
Faculty of Chemistry Northeast Normal University, Changchun 130024, China

### **Table of Contents**

|                                                                                                                                                                                    |    |
|------------------------------------------------------------------------------------------------------------------------------------------------------------------------------------|----|
| 1. The geometry structures of two isomers of NHC catalyst .....                                                                                                                    | S2 |
| 2. NHC-catalyzed previous activation Mode I .....                                                                                                                                  | S2 |
| 3. The effect of water on the activation barrier of the rate-determining step .....                                                                                                | S5 |
| 4. The optimized geometries of key transition states in Path 1 and Path 1-W .....                                                                                                  | S6 |
| 5. Overlay of the free energy profiles for the most favorable pathway 1-W in solvent phase with B3LYP-D3, M06-2X, and PBE0-D3 used.....                                            | S6 |
| 6. Electrostatic potential maps of transition states <b>TS3</b> and <b>TS3-W</b> .....                                                                                             | S7 |
| 7. The effect of substituents on NHC catalytic activity of two types of carbons (carbonyl and cyano).....                                                                          | S8 |
| 8. Cartesian coordination and Gibbs free energies for all the calculated species were performed at the pbe1pbe/6-311+g(2d,2p)//SMD <sub>CYC</sub> level in the solvent phase. .... | S9 |

## 1. The geometry structures of two isomers of NHC catalyst

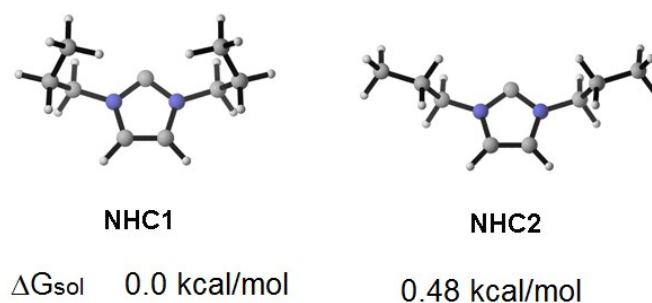

**Fig. S1** The structures and relative free energies of two NHC isomers.

## 2. NHC-catalyzed previous activiton Mode I

Shi and Li et al. proposed that NHC firstly attacks the carbonyl carbon of **1** to form the umpolung of cyclohexanone, then followed by nucleophilic addition, cyclisation and subsequent Dimroth rearrangement. We calculated this mechanism and found that it is impossible under the title reaction conditions (Scheme 3). As depicted in Fig. S2, the nucleophilic attack of C1 of NHC to the carbonyl carbon C2 of **1** via **TS1a** with the energy barrier of 13.4 kcal/mol, leads to the zwitterionic intermediate **4a**. This is the widely accepted umpolung type of computational studies. And the generation of complex **4a** is endothermic by 6.0 kcal/mol in solution.

Then followed by the nucleophilic addition of oxygen of **4a** to cyano carbon C3 of **2**, two isomers transition states can be developed when the free rotation of the C-C single bond between phenyl and cyano group, denoted as **TS2a<sub>1</sub>** and **TS2a<sub>2</sub>**, respectively. The addition of **4a** to the cyano carbon C3 of **2** from the same side of amidogen via **TS2a<sub>1</sub>** is found to be a preferred C-O bond formation step, the activation energy barrier is 18.1 kcal/mol, leading to a five-membered ring intermediate **6a<sub>1</sub>**. In addition, the addition of **4a** to cyano carbon C3 of **2** from the opposite side of amidogen via **TS2a<sub>2</sub>** (21.1 kcal/mol) generates the isomeric intermediate **6a<sub>2</sub>**, which is 3.0 kcal/mol higher in energy than that of transition state **TS2a<sub>1</sub>**. It is responsible for the strong hydrogen-bond interaction between  $-\text{NH}_2$  of **2** and the O atom of **1** (1.74 Å) in **TS2a<sub>1</sub>**, while absence in the **TS2a<sub>2</sub>**.

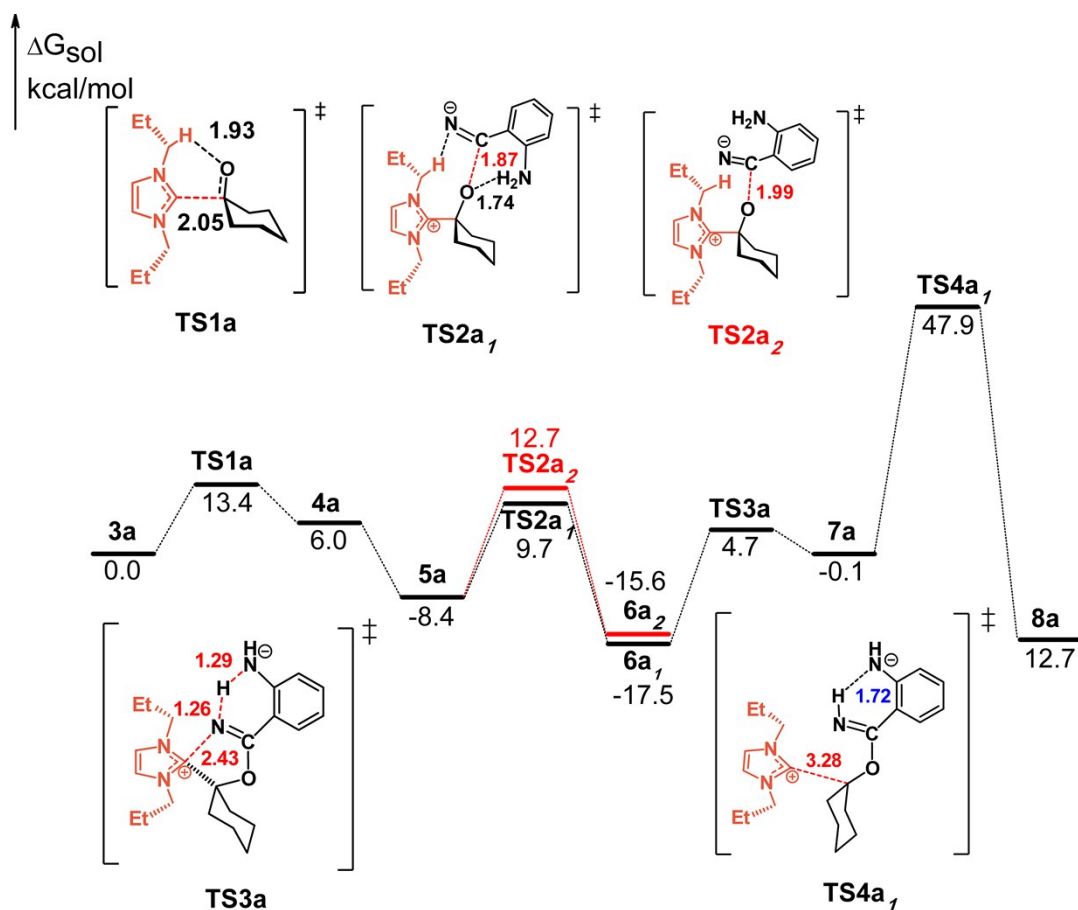

**Fig. S2** Gibbs free energy profile (in kcal/mol) for previous mechanism of NHC catalyzed activation Mode I obtained at the PBE0-D3/6-311+G(2d, 2p) level in solvent cyclohexanone.

However, these two types of nucleophilic addition of **2** to zwitterionic intermediate **4a** lead to two five-member ring intermediates **6a<sub>1</sub>** and **6a<sub>2</sub>**, rather than the zwitterionic intermediate **X** proposed by Shi et al (Scheme 3). This is due to 1) the unstable geometric structures of intermediate **4a** and transition states **TS2a<sub>1</sub>** and **TS2a<sub>2</sub>**, 2) the strong electronic interactions between positive charge of C1 on NHC and negative charge of N1 on cyano group (Fig. S4), and strong C-H...N- interactions between the NHC and **2** extensively promote the five-membered ring formation.

Afterwards, the hydrogen migration from the amino group to *N*-atom on cyano group (**TS3a**, 22.2 kcal/mol) occurs to promote the ring opening of **6a<sub>1</sub>** (or the **6a<sub>1</sub>** obtained by conversion of intermediate **6a<sub>2</sub>**) to afford **7a**. Subsequently, the elimination of NHC occurs, herein we explored the NHC elimination transition states **TS4a<sub>1</sub>**, wherein the NHC removal occurs before C3-C(aryl) rotation with the energy barrier of 32.0 kcal/mol. Then the transition states **TS4a<sub>1</sub>** can lead to the formation of

zwitterionic intermediate **8a**, but the energy barriers of **TS4a<sub>1</sub>** is too high to proceed under this reaction conditions, so these NHC catalyzed pathways in the Mode **I** could be excluded.

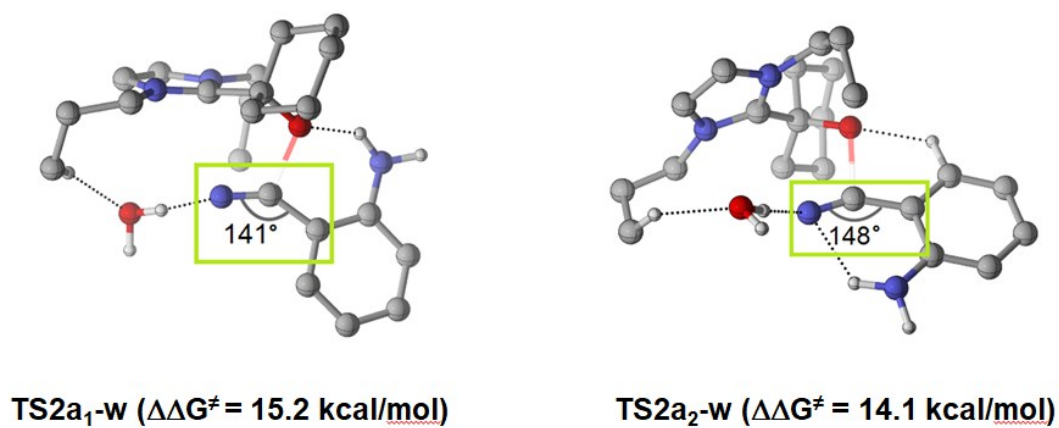

**Fig. S3** Optimized structures and  $\Delta\Delta G^\ddagger$  values of **TS2a<sub>1</sub>-w** and **TS2a<sub>2</sub>-w**.

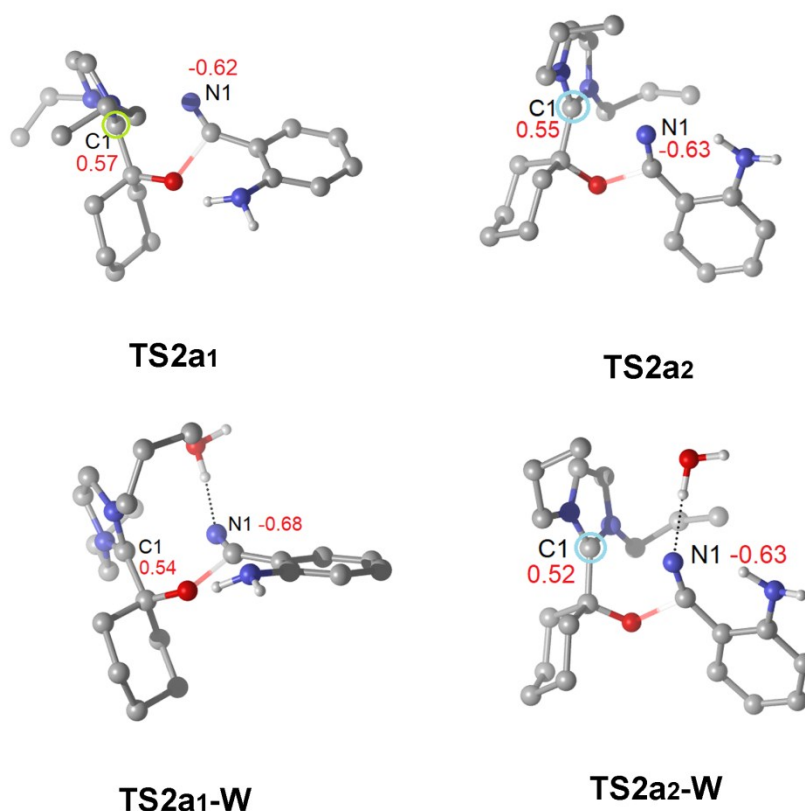

**Fig. S4** Optimized structures of transition states **TS2a<sub>1</sub>/TS2a<sub>1</sub>-W** and **TS2a<sub>2</sub>/TS2a<sub>2</sub>-W**. The values in red are corresponding NPA charge of C1 and N1 atoms.

### 3. The effect of water on the activation barrier of the rate-determining step

**Table S1** The comparison of the activation barriers of the (direct or 1-3 W assisted) rate-determining step of C-N bond formation. ( $\Delta\Delta G_{\text{sol}}$ , in kcal/mol).

| TSs<br>number               | Water-assisted |      |      | direct |
|-----------------------------|----------------|------|------|--------|
|                             | 1              | 2    | 3    |        |
| $\Delta\Delta G$ (kcal/mol) | 14.6           | 15.3 | 14.9 | 16.5   |

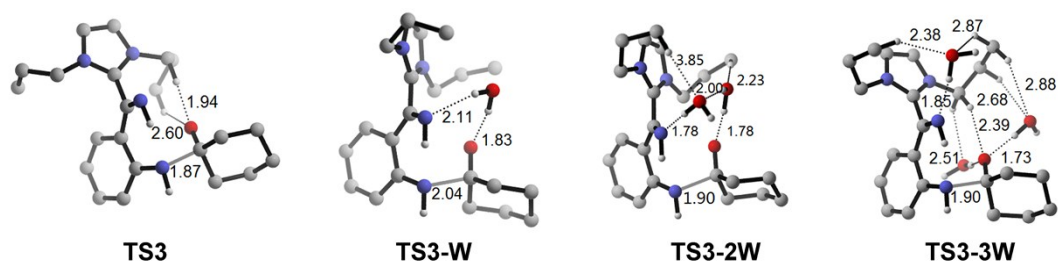

**Fig. S5** Optimized geometries of key transition states assisted by 1-3 molecules of water assisted for C-N bond formation process. Distances are in Å.

We have investigated the effect of 1-3 water molecules on the activation barrier of the rate-determining step transition state for C-N bond formation. The inclusion of a larger number of water molecules should obviously have to bear higher entropic costs and hence we have not considered systems beyond three water molecules. The calculation results shown that activation barriers of 1-3 water molecules assisted transition states are favorable than only NHC-catalyzed case by 1.9, 1.2, and 1.6 kcal/mol, and single water-assisted transition state **TS3-W** is the most favorable one. Therefore, we only present the most favorable Path 1-W and the feasible Path 1 to illustrate the role of water in the reaction Mode II (Table S1 and Fig. S5).

#### 4. The optimized geometries of key transition states in Path 1 and Path 1-W

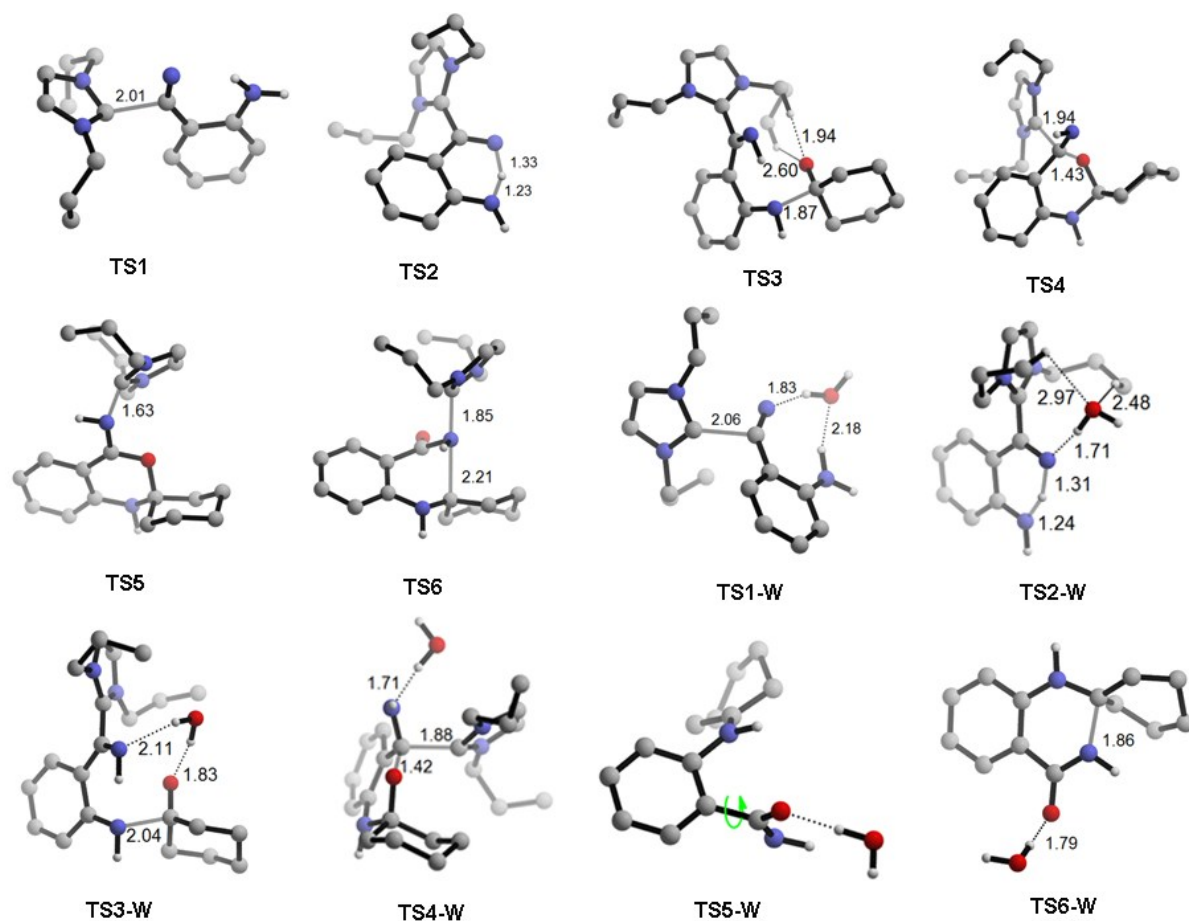

Fig. S6 Optimized geometries of key transition states in Path 1 and Path 1-W. Distances are in Å.

#### 5. Overlay of the free energy profiles for the most favorable pathway 1-W in solvent phase with B3LYP-D3, M06-2X, and PBE0-D3 used

DFT methods B3LYP-D3 and M06-2X with the same basis set 6-311+G(2d, 2p) were employed to calculate the solvation single point energies of the most favored Path 1-W for comparison (Fig. S7). Our computational results indicated that B3LYP-D3, M06-2X, and PBE0-D3 functionals provide the same trend in the relative energies of transition states and intermediates. Additionally, the relative energies of transition states and intermediates on the potential energy surfaces in Path 1-W at the PBE0-

D3/6-311+G\*\* level are much lower than those at the B3LYP-D3 (M06-2X)/6-311+G\*\* cases except the regeneration of NHC.

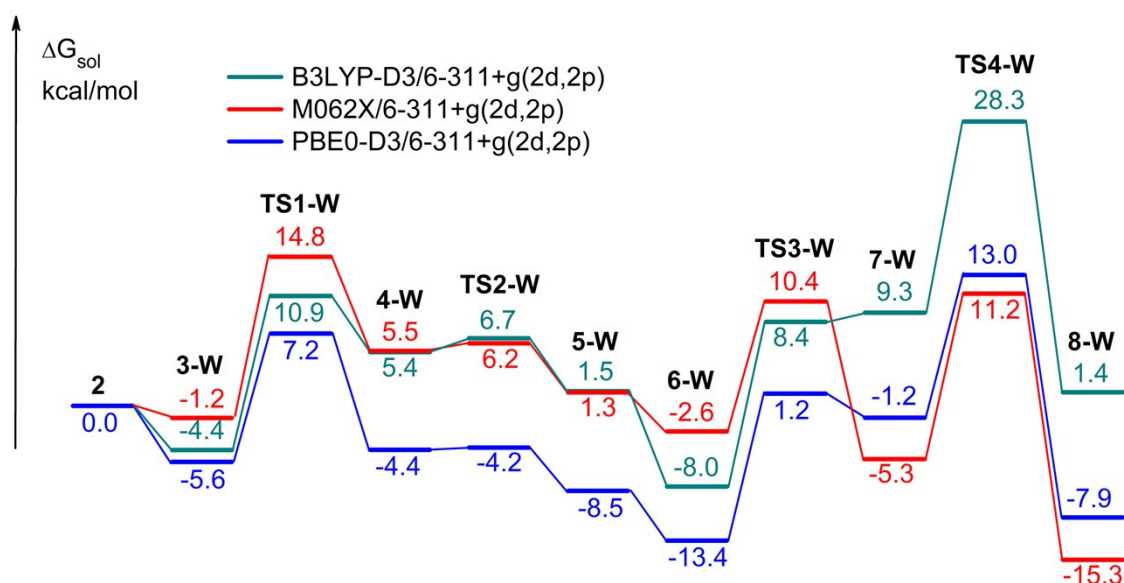

**Fig. S7** Free energy profile of the most favorable pathway 1-W in the solution phase with B3LYP-D3, M06-2X and PBE0-D3 used, free energies are given in kcal/mol.

## 6. Electrostatic potential maps of transition states TS3 and TS3-W

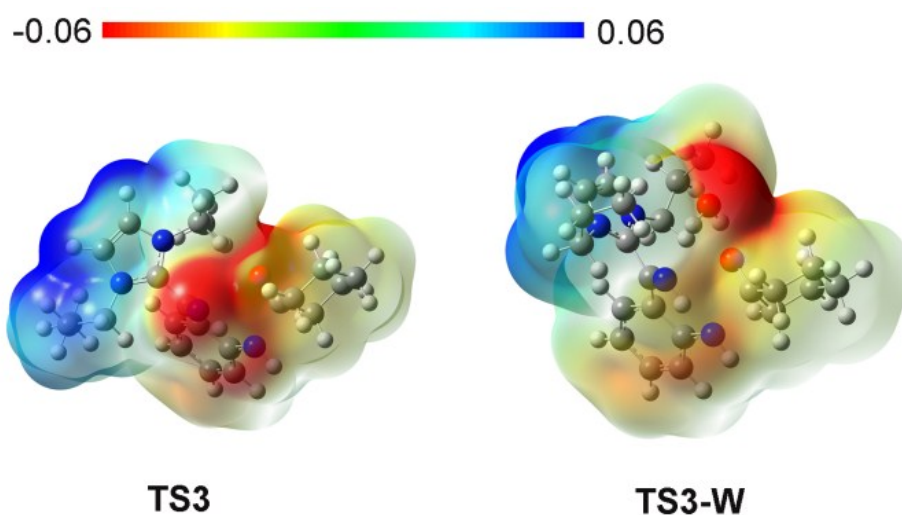

**Fig. S8** Electrostatic potential (ESP) maps of TS3 and TS3-W.

The electrostatic potentials on the structures of TS3 and TS3-W are illustrated in Fig. S8. The NHC portion of the two structures are both completely positive, and the

negatively charge is located on the  $-NH$  group of substrates **2** in **TS3**, while in the **TS3-W**, the negatively charge is located on the water. Therefore, water is predicted to transfer and capture the negative charge of substrates **2** and **1** and stabilize the structure of transition state **TS3-W**.

## 7. The effect of substituents on NHC catalytic activity of two types of carbons

(carbonyl and cyano)

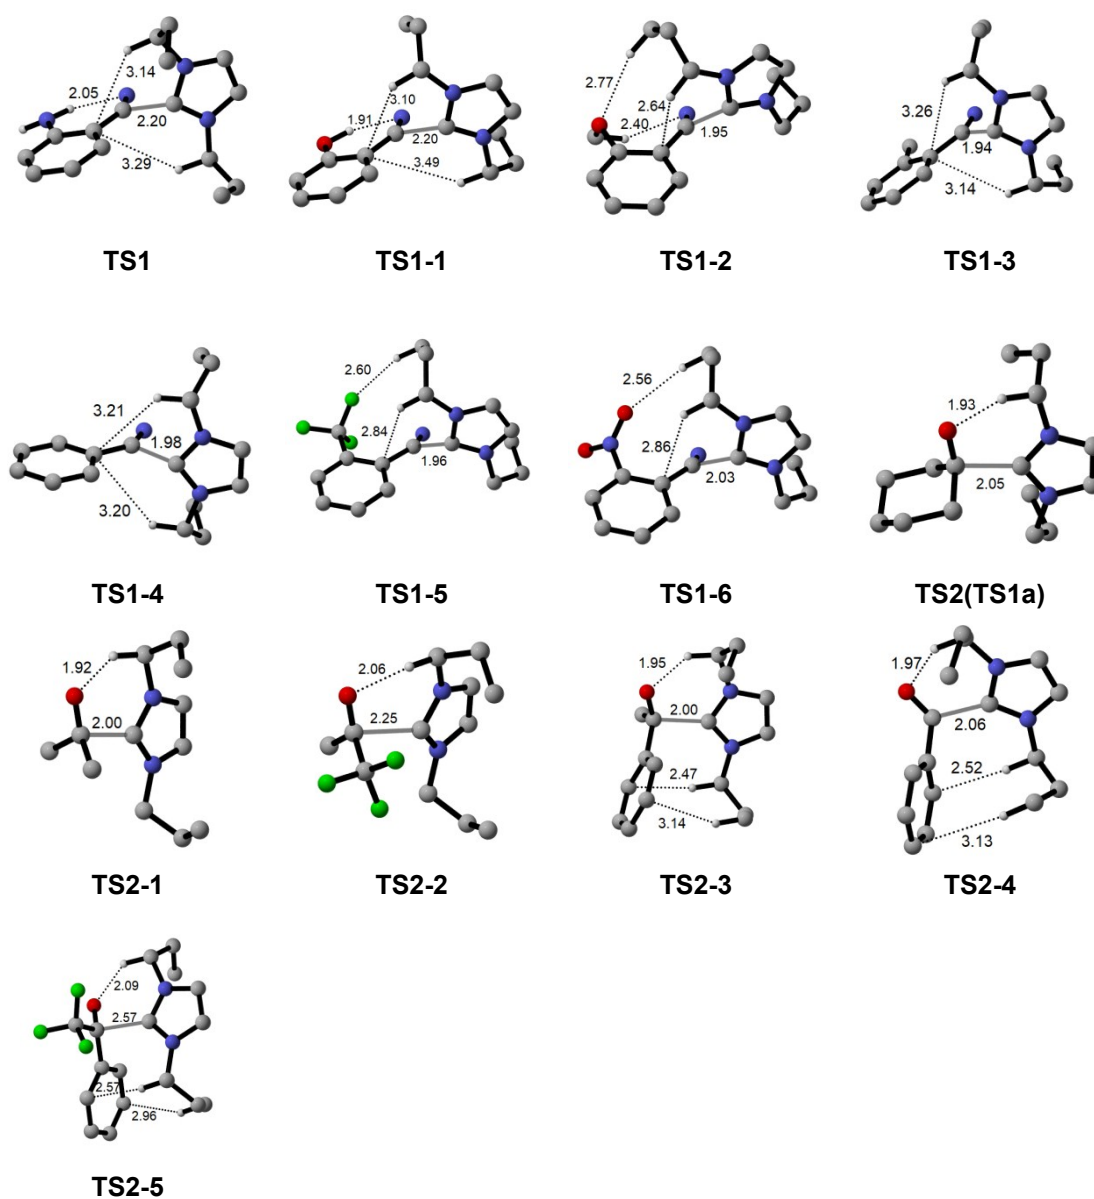

**Fig. S9** The corresponding geometry structures of transition states for the NHC activation



different derivatives of nitriles and ketones with various substituents.

**8. Cartesian coordination and Gibbs free energies for all the calculated species were performed at the pbe1pbe/6-311+g(2d,2p)//SMD<sub>CYC</sub> level in the solvent phase.**

**3a:**

Zero-point correction=0.392505 (Hartree/Particle)

Thermal correction to Energy=0.413634

Thermal correction to Enthalpy=0.414609

Thermal correction to Gibbs Free Energy=0.338429

Sum of electronic and zero-point Energies=-770.934287

Sum of electronic and thermal Energies=-770.913159

Sum of electronic and thermal Enthalpies=-770.912183

Sum of electronic and thermal Free Energies=-770.988364

|   |             |             |             |
|---|-------------|-------------|-------------|
| C | -1.47994900 | 0.00479600  | -0.67404400 |
| C | -3.75958100 | 0.20886700  | -0.71222800 |
| H | -4.78524100 | -0.12522200 | -0.76859800 |
| C | -3.24246400 | 1.45978600  | -0.62248000 |
| H | -3.73389800 | 2.42097200  | -0.58621200 |
| N | -2.67536600 | -0.65022500 | -0.74128200 |
| N | -1.86805800 | 1.30925200  | -0.60093800 |
| C | -0.93498700 | 2.42179100  | -0.50111600 |
| H | -1.15710700 | 3.13240800  | -1.30669800 |
| H | 0.06427000  | 2.01434100  | -0.67350100 |
| C | -2.78789300 | -2.09509700 | -0.81794800 |
| H | -1.77384800 | -2.46371100 | -0.99514300 |
| H | -3.39933300 | -2.35609600 | -1.69071200 |
| C | -0.98502900 | 3.12745000  | 0.85179400  |
| H | -0.31124500 | 3.99102700  | 0.79156600  |
| H | -1.99175100 | 3.53296100  | 1.02311400  |
| C | -0.57478200 | 2.23264800  | 2.01402400  |
| H | -0.61868200 | 2.77612000  | 2.96345800  |
| H | -1.23068900 | 1.35966900  | 2.09383000  |
| H | 0.44807700  | 1.86803100  | 1.87505600  |
| C | -3.37524300 | -2.72395800 | 0.44358300  |
| H | -4.39103200 | -2.33870800 | 0.60332800  |
| H | -3.48381300 | -3.80005100 | 0.25673100  |
| C | -2.53011800 | -2.49099900 | 1.68879500  |
| H | -2.41993800 | -1.42255900 | 1.89781700  |
| H | -2.98444700 | -2.96306200 | 2.56562400  |

|   |             |             |             |
|---|-------------|-------------|-------------|
| H | -1.52319900 | -2.90438300 | 1.56487700  |
| C | 2.21495400  | -0.57310500 | -0.89214900 |
| C | 2.56837600  | -1.78105700 | -0.01455300 |
| C | 4.07551500  | -2.00447700 | 0.07677400  |
| C | 4.78051200  | -0.75562300 | 0.59961100  |
| C | 4.47607000  | 0.46726600  | -0.27458000 |
| C | 2.98972000  | 0.66072300  | -0.49409500 |
| H | 4.29379800  | -2.85981300 | 0.72729700  |
| H | 2.16238400  | -1.61957500 | 0.99347600  |
| H | 2.06625000  | -2.67202600 | -0.40836200 |
| H | 2.49614700  | -0.79668600 | -1.93358800 |
| H | 1.13993400  | -0.35997000 | -0.87326800 |
| H | 4.44751700  | -0.55514300 | 1.62723700  |
| H | 5.86449400  | -0.91092400 | 0.64896200  |
| H | 4.88994600  | 1.39020300  | 0.14126800  |
| H | 4.92790000  | 0.31740500  | -1.26701100 |
| H | 4.47067700  | -2.25745400 | -0.91809100 |
| O | 2.46577400  | 1.75437400  | -0.37315600 |

**TS1a:**

Zero-point correction=0.393428 (Hartree/Particle)

Thermal correction to Energy=0.412664

Thermal correction to Enthalpy=0.413639

Thermal correction to Gibbs Free Energy=0.345612

Sum of electronic and zero-point Energies=-770.919123

Sum of electronic and thermal Energies=-770.899888

Sum of electronic and thermal Enthalpies=-770.898912

Sum of electronic and thermal Free Energies=-770.966940

|   |             |             |             |
|---|-------------|-------------|-------------|
| C | 0.63038900  | 0.01818400  | -0.48606200 |
| C | 2.41605300  | 1.22937800  | -1.18518100 |
| H | 2.97054900  | 2.11522800  | -1.45491700 |
| C | 2.77554100  | -0.07639400 | -1.19452800 |
| H | 3.70380600  | -0.55166600 | -1.47383900 |
| N | 1.10540900  | 1.26615000  | -0.74747100 |
| N | 1.67589100  | -0.79442100 | -0.77014600 |
| C | 1.70532600  | -2.25106300 | -0.61630300 |
| H | 2.18215700  | -2.65790300 | -1.51492600 |
| H | 0.66223900  | -2.57820800 | -0.57787500 |
| C | 0.37391400  | 2.51456900  | -0.57599900 |
| H | -0.64005600 | 2.25187400  | -0.27371300 |
| H | 0.31036300  | 3.01370100  | -1.55018300 |
| C | 2.46071100  | -2.68899100 | 0.63534300  |
| H | 2.49889900  | -3.78534200 | 0.61328900  |
| H | 3.50336700  | -2.34398400 | 0.58811100  |

|   |             |             |             |
|---|-------------|-------------|-------------|
| C | 1.80818100  | -2.22243600 | 1.93036800  |
| H | 2.33672300  | -2.62224500 | 2.80169300  |
| H | 1.81720200  | -1.12984500 | 2.00923400  |
| H | 0.76345100  | -2.54607300 | 1.97197200  |
| C | 1.01237500  | 3.44272000  | 0.45490100  |
| H | 2.01624800  | 3.73114900  | 0.11774100  |
| H | 0.42166700  | 4.36709600  | 0.46616500  |
| C | 1.08548000  | 2.84992500  | 1.85587600  |
| H | 1.67201600  | 1.92565800  | 1.86768200  |
| H | 1.55479800  | 3.55238600  | 2.55116800  |
| H | 0.08815000  | 2.61269400  | 2.24042500  |
| C | -1.66541800 | -0.06687300 | 1.12571700  |
| C | -3.17141500 | -0.29615200 | 1.30338600  |
| C | -3.95355400 | 0.22185600  | 0.09478600  |
| C | -3.45618600 | -0.40123400 | -1.21081000 |
| C | -1.95072900 | -0.17201200 | -1.39683500 |
| C | -1.23869300 | -0.76157600 | -0.17088300 |
| H | -5.02499200 | 0.02390300  | 0.22380700  |
| H | -3.34840600 | -1.37246000 | 1.42100000  |
| H | -3.52216000 | 0.19090500  | 2.22213500  |
| H | -1.46465400 | 1.01156500  | 1.09987200  |
| H | -1.09946100 | -0.49747100 | 1.95751100  |
| H | -3.64248800 | -1.48223700 | -1.19548900 |
| H | -4.00863900 | 0.01031600  | -2.06506600 |
| H | -1.58600400 | -0.68128400 | -2.29464100 |
| H | -1.75942000 | 0.90328300  | -1.51015800 |
| H | -3.84541300 | 1.31642800  | 0.03685800  |
| O | -1.12761300 | -2.01487200 | -0.12964900 |

**4a:**

Zero-point correction=0.394750 (Hartree/Particle)

Thermal correction to Energy=0.414003

Thermal correction to Enthalpy=0.414979

Thermal correction to Gibbs Free Energy=0.347378

Sum of electronic and zero-point Energies=-770.931426

Sum of electronic and thermal Energies=-770.912172

Sum of electronic and thermal Enthalpies=-770.911197

Sum of electronic and thermal Free Energies=-770.978797

|   |            |            |             |
|---|------------|------------|-------------|
| C | 0.48866600 | 0.01380800 | -0.51524900 |
| C | 2.12858400 | 1.44510400 | -1.06604100 |
| H | 2.58518400 | 2.39867700 | -1.27788100 |
| C | 2.64308300 | 0.19442500 | -1.08660100 |

|   |             |             |             |
|---|-------------|-------------|-------------|
| H | 3.63604600  | -0.15827500 | -1.31742900 |
| N | 0.80292200  | 1.32442600  | -0.70652300 |
| N | 1.62888300  | -0.67163500 | -0.74976700 |
| C | 1.86371500  | -2.12505100 | -0.66091400 |
| H | 2.37594000  | -2.41034800 | -1.58638700 |
| H | 0.85317200  | -2.55617600 | -0.60754700 |
| C | -0.06142500 | 2.50125300  | -0.59992100 |
| H | -1.03783000 | 2.16673400  | -0.25985800 |
| H | -0.18665400 | 2.91646400  | -1.60627500 |
| C | 2.69681900  | -2.48841900 | 0.56262800  |
| H | 2.85955500  | -3.57223900 | 0.51165500  |
| H | 3.69419900  | -2.02745500 | 0.50852900  |
| C | 2.01879200  | -2.12927400 | 1.87909600  |
| H | 2.58354700  | -2.52119300 | 2.73100100  |
| H | 1.94669600  | -1.04262800 | 2.00464000  |
| H | 1.00011900  | -2.52829400 | 1.90460600  |
| C | 0.49536400  | 3.55970100  | 0.34906100  |
| H | 1.43556600  | 3.96318800  | -0.04752100 |
| H | -0.21449000 | 4.39572100  | 0.33355800  |
| C | 0.69911200  | 3.07320400  | 1.77814400  |
| H | 1.40858900  | 2.24028300  | 1.82133200  |
| H | 1.09313900  | 3.87756800  | 2.40623400  |
| H | -0.24053000 | 2.72986500  | 2.22164500  |
| C | -1.47814000 | -0.08338600 | 1.11945700  |
| C | -2.86652000 | -0.67658000 | 1.34653100  |
| C | -3.80516200 | -0.34658700 | 0.18638300  |
| C | -3.23206900 | -0.83077600 | -1.14499000 |
| C | -1.84538000 | -0.24554200 | -1.39623900 |
| C | -0.90248300 | -0.66044200 | -0.21450100 |
| H | -4.79157800 | -0.79545900 | 0.35896400  |
| H | -2.75690200 | -1.76354200 | 1.42862100  |
| H | -3.28183700 | -0.30766600 | 2.29336400  |
| H | -1.55448100 | 1.01371600  | 1.13581000  |
| H | -0.79901600 | -0.37806300 | 1.92835800  |
| H | -3.13361300 | -1.92183200 | -1.12396500 |
| H | -3.90559100 | -0.56916100 | -1.97139500 |
| H | -1.42031000 | -0.66003700 | -2.31870400 |
| H | -1.92834900 | 0.84414600  | -1.52881500 |
| H | -3.96378200 | 0.74352500  | 0.14210300  |
| O | -0.79214700 | -1.98196200 | -0.13895900 |

**5a:**

Zero-point correction=0.511886 (Hartree/Particle)

Thermal correction to Energy=0.540575  
 Thermal correction to Enthalpy=0.541550  
 Thermal correction to Gibbs Free Energy=0.451612  
 Sum of electronic and zero-point Energies=-1150.379404  
 Sum of electronic and thermal Energies=-1150.350715  
 Sum of electronic and thermal Enthalpies=-1150.349739  
 Sum of electronic and thermal Free Energies=-1150.439678

|   |             |             |             |
|---|-------------|-------------|-------------|
| C | 1.53071900  | -0.41775100 | -0.18524900 |
| C | 2.67812800  | -1.85810300 | -1.46137300 |
| H | 3.33561400  | -2.17995100 | -2.25195800 |
| C | 1.95008600  | -2.57312000 | -0.57598100 |
| H | 1.84412100  | -3.63836300 | -0.44810600 |
| N | 2.42951800  | -0.52786100 | -1.20077400 |
| N | 1.26451000  | -1.67949400 | 0.20981000  |
| C | 0.38814800  | -2.15424400 | 1.29370500  |
| H | -0.34135000 | -2.82312300 | 0.82731500  |
| H | -0.11355000 | -1.25560300 | 1.66325800  |
| C | 3.08750200  | 0.53298000  | -1.96815300 |
| H | 2.90148600  | 1.47564800  | -1.45992200 |
| H | 2.61221500  | 0.58549100  | -2.95390900 |
| C | 1.17600000  | -2.85988200 | 2.39078300  |
| H | 0.43435100  | -3.24931200 | 3.09912000  |
| H | 1.70302300  | -3.73891200 | 1.99358700  |
| C | 2.15570600  | -1.94891300 | 3.12027200  |
| H | 2.64854100  | -2.47812000 | 3.94196500  |
| H | 2.93958400  | -1.58328800 | 2.44727600  |
| H | 1.64004100  | -1.07503200 | 3.53078600  |
| C | 4.59280300  | 0.32334000  | -2.10606200 |
| H | 4.80337600  | -0.58374200 | -2.68524100 |
| H | 4.96189400  | 1.15442700  | -2.71924200 |
| C | 5.33871400  | 0.28592000  | -0.77817600 |
| H | 5.00099600  | -0.54441000 | -0.14951000 |
| H | 6.41345200  | 0.16310000  | -0.94106800 |
| H | 5.18950400  | 1.21176700  | -0.21295200 |
| C | 1.97926600  | 1.69666600  | 1.11560300  |
| C | 1.39326600  | 3.00818400  | 1.63072100  |
| C | 0.78150600  | 3.82692200  | 0.49531200  |
| C | -0.27976700 | 3.02311100  | -0.25416700 |
| C | 0.28961400  | 1.71055700  | -0.78841200 |
| C | 0.86877700  | 0.87268200  | 0.39463300  |
| H | 0.34817000  | 4.75539400  | 0.88789600  |
| H | 0.61718300  | 2.76437400  | 2.36516800  |
| H | 2.16971000  | 3.58599200  | 2.14817300  |

|   |             |             |             |
|---|-------------|-------------|-------------|
| H | 2.83644500  | 1.91331100  | 0.46057200  |
| H | 2.35354700  | 1.09262000  | 1.95056900  |
| H | -1.11118900 | 2.79670400  | 0.42239200  |
| H | -0.68869300 | 3.61047400  | -1.08603300 |
| H | -0.49099100 | 1.11319700  | -1.27031600 |
| H | 1.03279000  | 1.94689600  | -1.55965300 |
| H | 1.57587200  | 4.12791600  | -0.20666100 |
| O | -0.11175700 | 0.56193000  | 1.26302100  |
| C | -6.16699000 | 0.25800400  | -0.10668800 |
| C | -5.99384100 | -0.49847400 | -1.27547000 |
| C | -4.71881900 | -0.92130800 | -1.60045200 |
| C | -3.61371300 | -0.60450100 | -0.78832100 |
| C | -3.77343800 | 0.17054300  | 0.39652300  |
| H | -4.54463900 | -1.51356800 | -2.49416100 |
| H | -7.16004000 | 0.60146200  | 0.17193600  |
| H | -6.83823400 | -0.74854700 | -1.90871400 |
| C | -2.33954800 | -1.10256100 | -1.17638100 |
| N | -1.31573300 | -1.53498900 | -1.52659200 |
| N | -2.75032200 | 0.48840100  | 1.21378100  |
| H | -1.71438000 | 0.42831700  | 1.01408800  |
| H | -2.97304300 | 1.07675400  | 2.00081700  |
| C | -5.09622100 | 0.58273000  | 0.70139600  |
| H | -5.25494400 | 1.17359800  | 1.60042400  |

**TS2a<sub>j</sub>:**

Zero-point correction=0.514518 (Hartree/Particle)

Thermal correction to Energy=0.541519

Thermal correction to Enthalpy=0.542495

Thermal correction to Gibbs Free Energy=0.458755

Sum of electronic and zero-point Energies=-1150.350193

Sum of electronic and thermal Energies=-1150.323192

Sum of electronic and thermal Enthalpies=-1150.322216

Sum of electronic and thermal Free Energies=-1150.405956

|   |             |             |             |
|---|-------------|-------------|-------------|
| C | -1.28549500 | 0.25175900  | -0.50130400 |
| C | -2.79833500 | 0.92787800  | -2.00725400 |
| H | -3.56834500 | 0.82123000  | -2.75405400 |
| C | -2.14027300 | 2.02116900  | -1.57618400 |
| H | -2.23673900 | 3.05353000  | -1.86815600 |
| N | -2.29821800 | -0.15935800 | -1.31279100 |
| N | -1.24482700 | 1.60855600  | -0.61144400 |
| C | -0.20962900 | 2.50622000  | -0.08364900 |
| H | 0.57442800  | 2.57565400  | -0.84643200 |
| H | 0.24200700  | 2.01279200  | 0.77395000  |

|   |             |             |             |
|---|-------------|-------------|-------------|
| C | -2.56624200 | -1.50399200 | -1.82741000 |
| H | -1.96217800 | -2.21341300 | -1.27407700 |
| H | -2.20306800 | -1.52230300 | -2.86084600 |
| C | -0.73399100 | 3.89035300  | 0.27608800  |
| H | 0.14042400  | 4.46666600  | 0.60092500  |
| H | -1.10528600 | 4.40984200  | -0.61653700 |
| C | -1.79592600 | 3.90636200  | 1.36898900  |
| H | -2.12951500 | 4.92838900  | 1.57357600  |
| H | -2.67638900 | 3.31919500  | 1.08657300  |
| H | -1.40599800 | 3.49205300  | 2.30486000  |
| C | -4.04330200 | -1.87821700 | -1.76032000 |
| H | -4.63478400 | -1.18239900 | -2.36897600 |
| H | -4.14496400 | -2.85602000 | -2.24670000 |
| C | -4.61161900 | -1.93630800 | -0.34795600 |
| H | -4.50183400 | -0.97494500 | 0.16487100  |
| H | -5.67721800 | -2.18400300 | -0.36623800 |
| H | -4.10502700 | -2.69691800 | 0.25545900  |
| C | -1.36810500 | 0.02179400  | 1.95917600  |
| C | -0.78969800 | -0.58329300 | 3.23681800  |
| C | -0.77971100 | -2.10828400 | 3.18746500  |
| C | -0.07764300 | -2.60345600 | 1.92628500  |
| C | -0.72054300 | -2.01350000 | 0.67201800  |
| C | -0.60616800 | -0.47217300 | 0.69672700  |
| H | -0.29515100 | -2.51423900 | 4.08372700  |
| H | 0.23643700  | -0.21768400 | 3.36353100  |
| H | -1.36785000 | -0.22936600 | 4.09982000  |
| H | -2.42864300 | -0.25578400 | 1.86197800  |
| H | -1.32909300 | 1.11353300  | 2.01390900  |
| H | 0.97888100  | -2.31420800 | 1.94836900  |
| H | -0.11559100 | -3.69824300 | 1.87189000  |
| H | -0.21587700 | -2.39236800 | -0.22235100 |
| H | -1.77193500 | -2.32908500 | 0.65163600  |
| H | -1.81632400 | -2.47882300 | 3.19611400  |
| O | 0.71351900  | -0.11135800 | 0.77071200  |
| C | 5.66474400  | -0.49577400 | -0.76826800 |
| C | 4.93728900  | -1.09727600 | -1.79692000 |
| C | 3.55480900  | -0.98799200 | -1.78535200 |
| C | 2.86444600  | -0.30640600 | -0.76912200 |
| C | 3.60441700  | 0.30151800  | 0.27486900  |
| H | 2.95986600  | -1.43253900 | -2.57742300 |
| H | 6.74957800  | -0.56168500 | -0.75071000 |
| H | 5.43896000  | -1.63829700 | -2.59312100 |
| C | 1.41282500  | -0.25293900 | -0.95841000 |
| N | 0.57771400  | -0.33022900 | -1.81076300 |

|   |            |            |            |
|---|------------|------------|------------|
| N | 3.01067300 | 1.04158900 | 1.27623200 |
| H | 2.05140000 | 0.75612300 | 1.47644900 |
| H | 3.59202400 | 1.18491500 | 2.08807900 |
| C | 5.00820300 | 0.18966500 | 0.24048500 |
| H | 5.58193700 | 0.66270500 | 1.03494800 |

**6a<sub>1</sub>**:

Zero-point correction=0.515857 (Hartree/Particle)

Thermal correction to Energy=0.542726

Thermal correction to Enthalpy=0.543702

Thermal correction to Gibbs Free Energy=0.459983

Sum of electronic and zero-point Energies=-1150.395220

Sum of electronic and thermal Energies=-1150.368352

Sum of electronic and thermal Enthalpies=-1150.367376

Sum of electronic and thermal Free Energies=-1150.451095

|   |             |             |             |
|---|-------------|-------------|-------------|
| C | -0.95923100 | 0.15186300  | -0.53426000 |
| C | -2.94316500 | 0.18787700  | -1.73835200 |
| H | -3.82674800 | -0.19760400 | -2.22568700 |
| C | -2.61727500 | 1.46174100  | -1.49885900 |
| H | -3.17626500 | 2.35247500  | -1.74724500 |
| N | -2.01462700 | -0.68424700 | -1.13556200 |
| N | -1.46897200 | 1.53076300  | -0.70058800 |
| C | -0.50495200 | 2.60087200  | -0.93183000 |
| H | -0.00198400 | 2.47887400  | -1.90321000 |
| H | 0.27150500  | 2.52351000  | -0.16124500 |
| C | -1.58673300 | -1.82177900 | -1.95155400 |
| H | -0.80180700 | -2.35471700 | -1.40766100 |
| H | -1.13255300 | -1.47372000 | -2.89188500 |
| C | -1.13213100 | 3.99025600  | -0.85533400 |
| H | -0.32816800 | 4.71279700  | -1.04296700 |
| H | -1.84227500 | 4.12405200  | -1.68117800 |
| C | -1.81187000 | 4.30761800  | 0.47111100  |
| H | -2.23663600 | 5.31666300  | 0.46344900  |
| H | -2.61911200 | 3.60001800  | 0.68338400  |
| H | -1.09847300 | 4.25528100  | 1.30179400  |
| C | -2.72748800 | -2.78807100 | -2.25913200 |
| H | -3.47266200 | -2.29638200 | -2.89753600 |
| H | -2.30536800 | -3.59467000 | -2.87189000 |
| C | -3.41000400 | -3.37516200 | -1.02997900 |
| H | -3.86032300 | -2.58858900 | -0.41682900 |
| H | -4.20032200 | -4.07655700 | -1.31664000 |
| H | -2.69476300 | -3.91795700 | -0.40149500 |



|   |             |             |             |
|---|-------------|-------------|-------------|
| C | -1.25701300 | 0.78333300  | 1.98117600  |
| C | -0.92569800 | 0.43830300  | 3.43222800  |
| C | -1.32391600 | -0.99381500 | 3.77644500  |
| C | -0.67509400 | -1.97574500 | 2.80575700  |
| C | -1.01348000 | -1.63747700 | 1.35441900  |
| C | -0.66293700 | -0.19841200 | 0.98373600  |
| H | -1.04423100 | -1.23327600 | 4.80943100  |
| H | 0.15253100  | 0.56890200  | 3.59972300  |
| H | -1.42893800 | 1.14945200  | 4.09810000  |
| H | -2.34431400 | 0.77154400  | 1.83021700  |
| H | -0.92683600 | 1.79568200  | 1.73867400  |
| H | 0.41513900  | -1.95770800 | 2.94228700  |
| H | -0.99580200 | -3.00173000 | 3.02228000  |
| H | -0.49228600 | -2.32518000 | 0.67994300  |
| H | -2.08571300 | -1.76876400 | 1.17257600  |
| H | -2.41764100 | -1.09158700 | 3.71547800  |
| O | 0.79229600  | -0.08669100 | 1.02938700  |
| C | 5.37578900  | -0.39084000 | -1.17799700 |
| C | 4.41374000  | -0.32695000 | -2.19228300 |
| C | 3.08143800  | -0.22211200 | -1.83774000 |
| C | 2.66868500  | -0.17895100 | -0.49464200 |
| C | 3.64530900  | -0.23103700 | 0.53238200  |
| H | 2.30409200  | -0.17409100 | -2.59396900 |
| H | 6.42989400  | -0.47606300 | -1.42841000 |
| H | 4.70471600  | -0.36105000 | -3.23707400 |
| C | 1.22422900  | -0.09187900 | -0.25890000 |
| N | 0.33580700  | -0.01738000 | -1.17882400 |
| N | 3.34576000  | -0.12950600 | 1.86733700  |
| H | 2.38406800  | -0.24251500 | 2.14731900  |
| H | 4.05104300  | -0.42414900 | 2.52176500  |
| C | 4.99868500  | -0.34242400 | 0.15108500  |
| H | 5.75476100  | -0.38006100 | 0.93199700  |

**TS2a<sub>2</sub>:**

Zero-point correction=0.514228 (Hartree/Particle)

Thermal correction to Energy=0.541383

Thermal correction to Enthalpy=0.542359

Thermal correction to Gibbs Free Energy=0.458226

Sum of electronic and zero-point Energies=-1150.354754

Sum of electronic and thermal Energies=-1150.327599

Sum of electronic and thermal Enthalpies=-1150.326623

Sum of electronic and thermal Free Energies=-1150.410756

|   |             |             |             |
|---|-------------|-------------|-------------|
| C | -1.61901200 | -0.00276100 | 0.47794700  |
| C | -3.07846900 | -1.66977400 | 0.76339300  |
| H | -3.87388300 | -2.34923100 | 0.50899900  |
| C | -2.31556000 | -1.59795000 | 1.87650500  |
| H | -2.33018200 | -2.19483600 | 2.77331900  |
| N | -2.64017200 | -0.68414100 | -0.09597700 |
| N | -1.41980600 | -0.57054500 | 1.69064600  |
| C | -0.41953900 | -0.19073200 | 2.70161900  |
| H | -0.93450300 | 0.38672000  | 3.47857300  |
| H | 0.28894500  | 0.45945600  | 2.17776200  |
| C | -3.10146500 | -0.56194400 | -1.48455700 |
| H | -2.22515900 | -0.29642500 | -2.07309700 |
| H | -3.82977800 | 0.25382400  | -1.54155700 |
| C | 0.28360500  | -1.39116600 | 3.32531100  |
| H | 0.95095200  | -0.97771400 | 4.09174400  |
| H | -0.43139600 | -2.01970600 | 3.87361800  |
| C | 1.08734100  | -2.23317800 | 2.34281700  |
| H | 1.57290300  | -3.06778900 | 2.85817900  |
| H | 0.45747100  | -2.64678900 | 1.54926600  |
| H | 1.86473700  | -1.63618600 | 1.85730800  |
| C | -3.70128000 | -1.84024800 | -2.05727500 |
| H | -4.59083600 | -2.14695200 | -1.49188500 |
| H | -4.07770100 | -1.56139400 | -3.04916800 |
| C | -2.71338100 | -2.99315900 | -2.20039000 |
| H | -2.33125000 | -3.33347600 | -1.23379100 |
| H | -3.18722300 | -3.84558300 | -2.69710700 |
| H | -1.84392700 | -2.68625000 | -2.78894500 |
| C | -1.20152000 | 1.82402500  | -1.35054600 |
| C | -0.55796600 | 3.19324400  | -1.56546400 |
| C | -1.12023200 | 4.23596200  | -0.60442600 |
| C | -0.96914200 | 3.76945800  | 0.83982500  |
| C | -1.57929300 | 2.38602600  | 1.04688500  |
| C | -0.92363000 | 1.33478400  | 0.09394400  |
| H | -0.62018900 | 5.20171800  | -0.74835500 |
| H | 0.52300800  | 3.09585000  | -1.41386100 |
| H | -0.71423200 | 3.50610400  | -2.60523800 |
| H | -2.27997100 | 1.91325000  | -1.54019400 |
| H | -0.77667000 | 1.10866700  | -2.05887600 |
| H | 0.09486600  | 3.71590100  | 1.09884400  |
| H | -1.43912700 | 4.48292400  | 1.52864500  |
| H | -1.44644600 | 2.08300600  | 2.08976400  |
| H | -2.66333600 | 2.42276000  | 0.85531400  |
| H | -2.18664400 | 4.39875700  | -0.82532600 |
| O | 0.41369600  | 1.24129200  | 0.32848500  |

|   |            |             |             |
|---|------------|-------------|-------------|
| C | 5.29862900 | 0.06528800  | -0.39603000 |
| C | 4.49809000 | 1.12899300  | 0.02781200  |
| C | 3.11670500 | 1.01211300  | -0.05185800 |
| C | 2.51670400 | -0.15056300 | -0.54844500 |
| C | 3.32989900 | -1.23434700 | -0.98019500 |
| H | 2.45553300 | 1.81111700  | 0.26129900  |
| H | 6.38167800 | 0.14181600  | -0.34143800 |
| H | 4.94801500 | 2.03914000  | 0.41221500  |
| C | 1.08477100 | -0.32856900 | -0.69462100 |
| N | 0.23610500 | -1.03665800 | -1.13734500 |
| N | 2.76748300 | -2.40248300 | -1.42927700 |
| H | 1.78025900 | -2.35400500 | -1.66230400 |
| H | 3.34198300 | -3.00290500 | -1.99738300 |
| C | 4.72644400 | -1.09742100 | -0.88911000 |
| H | 5.35706100 | -1.92380300 | -1.20937600 |

**6a<sub>2</sub>:**

Zero-point correction=0.515046 (Hartree/Particle)

Thermal correction to Energy=0.542105

Thermal correction to Enthalpy=0.543081

Thermal correction to Gibbs Free Energy=0.459329

Sum of electronic and zero-point Energies=-1150.398411

Sum of electronic and thermal Energies=-1150.371353

Sum of electronic and thermal Enthalpies=-1150.370377

Sum of electronic and thermal Free Energies=-1150.454128

|   |             |             |             |
|---|-------------|-------------|-------------|
| C | -1.12019700 | -0.18008500 | 0.05440000  |
| C | -3.14159600 | -1.33147700 | -0.15608400 |
| H | -4.04271800 | -1.67620000 | -0.64036800 |
| C | -2.81999500 | -1.35292700 | 1.14630200  |
| H | -3.39432200 | -1.71662300 | 1.98581000  |
| N | -2.13482100 | -0.66897500 | -0.87243000 |
| N | -1.59400900 | -0.71562100 | 1.32585300  |
| C | -0.80877400 | -0.80173600 | 2.53401500  |
| H | -1.26931400 | -0.18526000 | 3.32444200  |
| H | 0.17137700  | -0.35961000 | 2.32700300  |
| C | -1.84295300 | -0.96779900 | -2.26410900 |
| H | -0.79528900 | -0.70120800 | -2.43700800 |
| H | -2.45182200 | -0.32406000 | -2.91829200 |
| C | -0.61327000 | -2.21805100 | 3.08153200  |
| H | -0.09959700 | -2.12588700 | 4.04767500  |
| H | -1.59441600 | -2.65736100 | 3.30404000  |
| C | 0.16678700  | -3.14302100 | 2.15950500  |

|   |             |             |             |
|---|-------------|-------------|-------------|
| H | 0.26369200  | -4.14253900 | 2.59619200  |
| H | -0.33571600 | -3.24097400 | 1.19292800  |
| H | 1.17350600  | -2.75486800 | 1.97034600  |
| C | -2.05176000 | -2.42453800 | -2.67998800 |
| H | -3.10063800 | -2.70703600 | -2.52448200 |
| H | -1.88711300 | -2.47555100 | -3.76447900 |
| C | -1.14059600 | -3.41397500 | -1.96760200 |
| H | -1.30348700 | -3.38275200 | -0.88619700 |
| H | -1.32912600 | -4.43756200 | -2.30817000 |
| H | -0.08707700 | -3.18191600 | -2.15765300 |
| C | -1.31731100 | 2.02737600  | -1.29985300 |
| C | -1.11628100 | 3.54170800  | -1.31761400 |
| C | -1.89611600 | 4.21862200  | -0.19456100 |
| C | -1.50770700 | 3.62590400  | 1.15669600  |
| C | -1.68784400 | 2.10797600  | 1.18422700  |
| C | -0.96088400 | 1.40339000  | 0.04930700  |
| H | -1.71794600 | 5.30060200  | -0.20252200 |
| H | -0.04754400 | 3.76820400  | -1.20760300 |
| H | -1.42235700 | 3.93757000  | -2.29338800 |
| H | -2.36648200 | 1.78360600  | -1.50711600 |
| H | -0.71826600 | 1.55810100  | -2.08812600 |
| H | -0.45726700 | 3.86553100  | 1.36934000  |
| H | -2.10094600 | 4.07708400  | 1.96105900  |
| H | -1.35029000 | 1.70631900  | 2.14304100  |
| H | -2.75125600 | 1.84969400  | 1.09164700  |
| H | -2.97408500 | 4.07551000  | -0.36077000 |
| O | 0.47268500  | 1.56591300  | 0.23446500  |
| C | 5.28097700  | 0.34942500  | -0.21931500 |
| C | 4.59750600  | 1.53773800  | 0.06618700  |
| C | 3.21404200  | 1.51894300  | 0.09664600  |
| C | 2.48681700  | 0.34304200  | -0.15090500 |
| C | 3.18133400  | -0.86089900 | -0.45289500 |
| H | 2.65747900  | 2.42318500  | 0.32031000  |
| H | 6.36751600  | 0.34062300  | -0.24575200 |
| H | 5.14084700  | 2.45624200  | 0.26207000  |
| C | 1.03204400  | 0.37552900  | -0.07488100 |
| N | 0.23849000  | -0.62598000 | -0.25486000 |
| N | 2.51972900  | -2.01288100 | -0.74583900 |
| H | 1.51349700  | -2.02357000 | -0.59287200 |
| H | 3.03399700  | -2.87685800 | -0.76459700 |
| C | 4.59141300  | -0.82178800 | -0.47394800 |
| H | 5.13413300  | -1.73568200 | -0.70366300 |

**TS3a**

|                                              |                             |
|----------------------------------------------|-----------------------------|
| Zero-point correction=                       | 0.511777 (Hartree/Particle) |
| Thermal correction to Energy=                | 0.538284                    |
| Thermal correction to Enthalpy=              | 0.539260                    |
| Thermal correction to Gibbs Free Energy=     | 0.456126                    |
| Sum of electronic and zero-point Energies=   | -1150.363147                |
| Sum of electronic and thermal Energies=      | -1150.336640                |
| Sum of electronic and thermal Enthalpies=    | -1150.335664                |
| Sum of electronic and thermal Free Energies= | -1150.418798                |

|   |             |             |             |
|---|-------------|-------------|-------------|
| C | -1.54980900 | 0.05973000  | 0.44800100  |
| C | -3.21173600 | -1.39895100 | 0.76953200  |
| H | -4.08811500 | -1.97614800 | 0.52884200  |
| C | -2.44921600 | -1.40089700 | 1.88267100  |
| H | -2.54086100 | -1.97199600 | 2.79167900  |
| N | -2.66329900 | -0.48816200 | -0.11268900 |
| N | -1.43292200 | -0.48851400 | 1.68695500  |
| C | -0.35557800 | -0.29068300 | 2.66737000  |
| H | -0.76068400 | 0.29310600  | 3.50290600  |
| H | 0.42057100  | 0.29699500  | 2.17744100  |
| C | -2.98340600 | -0.45575100 | -1.54616200 |
| H | -2.01534500 | -0.38151000 | -2.04775900 |
| H | -3.57953900 | 0.43566900  | -1.76219900 |
| C | 0.22900700  | -1.60363500 | 3.18409100  |
| H | 0.98657100  | -1.32013900 | 3.92531600  |
| H | -0.53298100 | -2.16152600 | 3.74419900  |
| C | 0.85392000  | -2.48282000 | 2.10939200  |
| H | 1.24883900  | -3.40255000 | 2.55166400  |
| H | 0.12869300  | -2.76031100 | 1.33911500  |
| H | 1.67608800  | -1.97069200 | 1.60074200  |
| C | -3.70055800 | -1.69925300 | -2.05742000 |
| H | -4.65621000 | -1.84876200 | -1.53794400 |
| H | -3.97445400 | -1.46623600 | -3.09369100 |
| C | -2.85416800 | -2.96806000 | -2.03845600 |
| H | -2.56657800 | -3.26058400 | -1.02447700 |
| H | -3.40133900 | -3.80277500 | -2.48734400 |
| H | -1.92736000 | -2.82150700 | -2.60103400 |
| C | -1.15531400 | 1.94150100  | -1.30896200 |
| C | -0.43189600 | 3.26890600  | -1.53864200 |
| C | -0.80316900 | 4.31127300  | -0.49037600 |
| C | -0.53379400 | 3.77149700  | 0.90947300  |
| C | -1.22691800 | 2.42939000  | 1.13607600  |
| C | -0.83418000 | 1.36939400  | 0.08391800  |
| H | -0.24403700 | 5.23944300  | -0.65616500 |

|   |             |             |             |
|---|-------------|-------------|-------------|
| H | 0.65011100  | 3.09359600  | -1.52048700 |
| H | -0.67618100 | 3.62966100  | -2.54451000 |
| H | -2.23672800 | 2.10604000  | -1.39471200 |
| H | -0.84854700 | 1.22489800  | -2.07202800 |
| H | 0.54560500  | 3.64187000  | 1.05236900  |
| H | -0.87491600 | 4.48167200  | 1.67238100  |
| H | -1.00409100 | 2.06903200  | 2.14304900  |
| H | -2.31684200 | 2.56043400  | 1.07845400  |
| H | -1.86988200 | 4.56429000  | -0.58634500 |
| O | 0.56179600  | 1.16834300  | 0.19646800  |
| C | 5.23932100  | -0.48353300 | -0.47223000 |
| C | 4.70146200  | 0.67692800  | 0.11091800  |
| C | 3.32505300  | 0.84675700  | 0.10278300  |
| C | 2.47283200  | -0.10676100 | -0.47002000 |
| C | 3.01166500  | -1.29566500 | -1.07832300 |
| H | 2.88323900  | 1.73566700  | 0.54469400  |
| H | 6.31712300  | -0.63313700 | -0.47433000 |
| H | 5.35024100  | 1.42503200  | 0.55600600  |
| C | 1.02063000  | 0.01490100  | -0.48579000 |
| N | 0.20122500  | -0.80843900 | -0.99081200 |
| N | 2.15763900  | -2.17403800 | -1.61948200 |
| H | 0.97863700  | -1.69550900 | -1.42790200 |
| H | 2.57605400  | -3.00143600 | -2.02469300 |
| C | 4.42823900  | -1.44157400 | -1.04735400 |
| H | 4.86572200  | -2.33142400 | -1.49572700 |

## 7a

|                                              |                             |
|----------------------------------------------|-----------------------------|
| Zero-point correction=                       | 0.516833 (Hartree/Particle) |
| Thermal correction to Energy=                | 0.543473                    |
| Thermal correction to Enthalpy=              | 0.544449                    |
| Thermal correction to Gibbs Free Energy=     | 0.459264                    |
| Sum of electronic and zero-point Energies=   | -1150.368718                |
| Sum of electronic and thermal Energies=      | -1150.342079                |
| Sum of electronic and thermal Enthalpies=    | -1150.341103                |
| Sum of electronic and thermal Free Energies= | -1150.426288                |

|   |             |             |             |
|---|-------------|-------------|-------------|
| C | -1.53926300 | 0.02872000  | 0.46984600  |
| C | -3.15271600 | -1.47150900 | 0.82742300  |
| H | -4.02505400 | -2.06349500 | 0.60945100  |
| C | -2.34154200 | -1.48204500 | 1.90567400  |
| H | -2.37621600 | -2.07961100 | 2.80146600  |
| N | -2.66267300 | -0.52787700 | -0.05402200 |

|   |             |             |             |
|---|-------------|-------------|-------------|
| N | -1.35617900 | -0.54221700 | 1.68782200  |
| C | -0.24365300 | -0.34212100 | 2.63108700  |
| H | -0.62686100 | 0.22559200  | 3.48752800  |
| H | 0.50721600  | 0.26179100  | 2.12304400  |
| C | -3.08110800 | -0.44261600 | -1.46019900 |
| H | -2.16045900 | -0.29131700 | -2.02619800 |
| H | -3.73470800 | 0.42580900  | -1.58720400 |
| C | 0.37595400  | -1.65365000 | 3.10903200  |
| H | 1.17287400  | -1.36533500 | 3.80572900  |
| H | -0.34899500 | -2.21617100 | 3.71227800  |
| C | 0.94450400  | -2.52756600 | 1.99943400  |
| H | 1.38367700  | -3.43729900 | 2.41971100  |
| H | 0.17539500  | -2.82619100 | 1.28128600  |
| H | 1.72220000  | -2.00674900 | 1.43329300  |
| C | -3.76905100 | -1.69750200 | -1.98403100 |
| H | -4.68647300 | -1.91104700 | -1.42031100 |
| H | -4.11073300 | -1.43695600 | -2.99321200 |
| C | -2.86801900 | -2.92552300 | -2.06126900 |
| H | -2.50453300 | -3.23728800 | -1.07778400 |
| H | -3.40598300 | -3.76964700 | -2.50321700 |
| H | -1.98633500 | -2.72268300 | -2.67656500 |
| C | -1.23022100 | 1.94789000  | -1.27535200 |
| C | -0.53045300 | 3.28885100  | -1.50228300 |
| C | -0.87788500 | 4.30707300  | -0.42281800 |
| C | -0.55472600 | 3.74415100  | 0.95620200  |
| C | -1.22626800 | 2.39081100  | 1.18040400  |
| C | -0.85858100 | 1.35512300  | 0.09613200  |
| H | -0.33448400 | 5.24410800  | -0.58994000 |
| H | 0.55347600  | 3.12690300  | -1.52475300 |
| H | -0.81319000 | 3.66420000  | -2.49244700 |
| H | -2.31555900 | 2.09965400  | -1.32417300 |
| H | -0.93749200 | 1.25014700  | -2.06095800 |
| H | 0.53022000  | 3.62465300  | 1.06049900  |
| H | -0.87715500 | 4.43485700  | 1.74438600  |
| H | -0.96684300 | 2.01344600  | 2.17223400  |
| H | -2.31857600 | 2.51041900  | 1.16043800  |
| H | -1.94978000 | 4.54999200  | -0.47782700 |
| O | 0.54625700  | 1.17305100  | 0.15879800  |
| C | 5.22879900  | -0.38433700 | -0.48630500 |
| C | 4.64736800  | 0.77099400  | 0.08679100  |
| C | 3.27375400  | 0.89338100  | 0.05974400  |
| C | 2.44514700  | -0.09131000 | -0.51788400 |
| C | 3.01840600  | -1.28374100 | -1.12263800 |
| H | 2.80273600  | 1.77326200  | 0.48987400  |

|   |            |             |             |
|---|------------|-------------|-------------|
| H | 6.31109100 | -0.50057600 | -0.47521900 |
| H | 5.26740000 | 1.54219600  | 0.53303400  |
| C | 1.01316500 | 0.04765100  | -0.52074900 |
| N | 0.13290400 | -0.74408000 | -1.01465300 |
| N | 2.24357300 | -2.20758800 | -1.67182300 |
| H | 0.65691900 | -1.55720000 | -1.42385700 |
| H | 2.80728600 | -2.97319800 | -2.03471800 |
| C | 4.45748600 | -1.36315000 | -1.05992700 |
| H | 4.92893000 | -2.24178400 | -1.49739600 |

#### TS4<sub>r</sub>

|                                              |                             |
|----------------------------------------------|-----------------------------|
| Zero-point correction=                       | 0.510589 (Hartree/Particle) |
| Thermal correction to Energy=                | 0.538571                    |
| Thermal correction to Enthalpy=              | 0.539546                    |
| Thermal correction to Gibbs Free Energy=     | 0.450705                    |
| Sum of electronic and zero-point Energies=   | -1150.289992                |
| Sum of electronic and thermal Energies=      | -1150.262011                |
| Sum of electronic and thermal Enthalpies=    | -1150.261035                |
| Sum of electronic and thermal Free Energies= | -1150.349876                |

|   |            |             |             |
|---|------------|-------------|-------------|
| C | 2.24535800 | -0.58908000 | 0.37367100  |
| C | 3.05907700 | -2.53649500 | 1.24591700  |
| H | 3.09228600 | -3.38680300 | 1.91022000  |
| C | 3.89398000 | -2.17063300 | 0.24272000  |
| H | 4.79144200 | -2.63968700 | -0.13295300 |
| N | 2.07251400 | -1.57118400 | 1.30268100  |
| N | 3.38251500 | -0.99183200 | -0.26807800 |
| C | 3.96329700 | -0.30372300 | -1.40638300 |
| H | 5.03474700 | -0.16192200 | -1.21982400 |
| H | 3.49778800 | 0.68455100  | -1.44198900 |
| C | 0.96120400 | -1.62334000 | 2.24562600  |
| H | 0.33279600 | -0.75150700 | 2.05003400  |
| H | 1.36219200 | -1.53166700 | 3.26301300  |
| C | 3.74940200 | -1.03706500 | -2.72922600 |
| H | 4.30691400 | -0.49358200 | -3.50286700 |
| H | 4.20714200 | -2.03283500 | -2.66608500 |
| C | 2.28496900 | -1.16181800 | -3.12761200 |
| H | 2.18067300 | -1.70433400 | -4.07208000 |
| H | 1.70687900 | -1.69388400 | -2.36630300 |
| H | 1.82505700 | -0.17547300 | -3.25576800 |
| C | 0.12997600 | -2.89787700 | 2.12150400  |
| H | 0.74131900 | -3.76961200 | 2.39289300  |



|   |             |             |             |
|---|-------------|-------------|-------------|
| H | -0.66309400 | -2.83393700 | 2.87599000  |
| C | -0.48722500 | -3.09852800 | 0.74364600  |
| H | 0.28148600  | -3.15174100 | -0.03505000 |
| H | -1.06261200 | -4.02873400 | 0.70914000  |
| H | -1.16852500 | -2.27981600 | 0.49402100  |
| C | 0.49044800  | 2.27241900  | 1.60765100  |
| C | 0.48555300  | 3.81066900  | 1.76241700  |
| C | 1.35740100  | 4.50333200  | 0.72058600  |
| C | 0.94738800  | 4.09977400  | -0.69226100 |
| C | 0.98046800  | 2.56736300  | -0.85904400 |
| C | 0.15266300  | 1.93217600  | 0.20264100  |
| H | 1.28528900  | 5.59104200  | 0.83440100  |
| H | -0.54757900 | 4.17337800  | 1.68740300  |
| H | 0.82472800  | 4.04459500  | 2.77667600  |
| H | 1.50874400  | 1.88950000  | 1.75931600  |
| H | -0.19158900 | 1.78167400  | 2.29891900  |
| H | -0.06469800 | 4.46664300  | -0.90708100 |
| H | 1.61001900  | 4.54679500  | -1.44093400 |
| H | 0.63165700  | 2.24939400  | -1.84402700 |
| H | 2.00448400  | 2.20510300  | -0.71284700 |
| H | 2.41037400  | 4.23685000  | 0.88624200  |
| O | -0.84378500 | 1.27847100  | -0.21763200 |
| C | -4.88956900 | -0.96391300 | -2.01938200 |
| C | -3.81863500 | -0.22498900 | -2.58067700 |
| C | -2.84239900 | 0.26833600  | -1.74602700 |
| C | -2.88126100 | 0.05837000  | -0.34860600 |
| C | -3.97221400 | -0.70228300 | 0.25240900  |
| H | -2.01734300 | 0.83264500  | -2.16788400 |
| H | -5.66661300 | -1.35765100 | -2.67126700 |
| H | -3.76869700 | -0.05285700 | -3.65107000 |
| C | -1.89577100 | 0.55459200  | 0.56092100  |
| N | -1.76324300 | 0.47211300  | 1.81177200  |
| N | -4.00622700 | -0.90593600 | 1.55708800  |
| H | -2.60719500 | -0.07897000 | 2.12152500  |
| H | -4.82722000 | -1.44939100 | 1.81384300  |
| C | -4.96494600 | -1.19306300 | -0.67224700 |
| H | -5.79447600 | -1.76299900 | -0.25825900 |

### 8a

|                                          |                             |
|------------------------------------------|-----------------------------|
| Zero-point correction=                   | 0.514995 (Hartree/Particle) |
| Thermal correction to Energy=            | 0.542662                    |
| Thermal correction to Enthalpy=          | 0.543637                    |
| Thermal correction to Gibbs Free Energy= | 0.454498                    |

|                                              |              |
|----------------------------------------------|--------------|
| Sum of electronic and zero-point Energies=   | -1150.392308 |
| Sum of electronic and thermal Energies=      | -1150.364641 |
| Sum of electronic and thermal Enthalpies=    | -1150.363665 |
| Sum of electronic and thermal Free Energies= | -1150.452805 |

|   |             |             |             |
|---|-------------|-------------|-------------|
| C | 2.13673600  | 0.61838200  | -0.06103400 |
| C | 4.23904000  | 1.26781700  | 0.53414000  |
| H | 5.03592200  | 1.55750100  | 1.20289400  |
| C | 4.21552000  | 1.16541300  | -0.81874300 |
| H | 4.98840000  | 1.34982000  | -1.55004400 |
| N | 2.97034600  | 0.93151100  | 0.96762600  |
| N | 2.93389600  | 0.77149600  | -1.15302600 |
| C | 2.48252000  | 0.52677600  | -2.51526900 |
| H | 2.66838100  | 1.42836500  | -3.11086100 |
| H | 1.40053500  | 0.38128400  | -2.45492300 |
| C | 2.56827600  | 0.89929400  | 2.36502900  |
| H | 1.48504200  | 0.75094400  | 2.36325800  |
| H | 2.77303000  | 1.88011400  | 2.81043900  |
| C | 3.15061800  | -0.68374200 | -3.16187300 |
| H | 2.78821600  | -0.74151900 | -4.19566300 |
| H | 4.23341600  | -0.51358300 | -3.22801400 |
| C | 2.87122600  | -1.99379800 | -2.43725100 |
| H | 3.35441300  | -2.83294500 | -2.94695000 |
| H | 3.24664600  | -1.96637400 | -1.40900900 |
| H | 1.79644300  | -2.20000000 | -2.39267900 |
| C | 3.25698600  | -0.20166800 | 3.16728100  |
| H | 4.34169200  | -0.03158300 | 3.16589400  |
| H | 2.93429000  | -0.09514100 | 4.21044600  |
| C | 2.94788000  | -1.60583500 | 2.66568600  |
| H | 3.28627200  | -1.74198600 | 1.63334700  |
| H | 3.44568800  | -2.35975600 | 3.28308400  |
| H | 1.87129700  | -1.80640700 | 2.69004400  |
| C | -2.02504600 | 1.30588100  | 1.22764400  |
| C | -2.98010500 | 2.48358500  | 1.40784600  |
| C | -2.48628300 | 3.71024700  | 0.64338200  |
| C | -2.27340800 | 3.38487700  | -0.83398700 |
| C | -1.33003100 | 2.19799300  | -1.02006100 |
| C | -1.79660400 | 0.96459200  | -0.25510700 |
| H | -3.19945200 | 4.53652300  | 0.74885200  |
| H | -3.97438500 | 2.19856300  | 1.04224500  |
| H | -3.08639700 | 2.71257600  | 2.47512400  |
| H | -1.04299100 | 1.55059500  | 1.65599500  |
| H | -2.39096600 | 0.41661900  | 1.75411200  |
| H | -3.23855400 | 3.14539900  | -1.29614200 |

|   |             |             |             |
|---|-------------|-------------|-------------|
| H | -1.87203000 | 4.25609300  | -1.36532100 |
| H | -1.24340200 | 1.92410700  | -2.07709200 |
| H | -0.32324500 | 2.44864000  | -0.65928900 |
| H | -1.53788600 | 4.05552900  | 1.08270600  |
| O | -3.04037700 | 0.58870800  | -0.85433200 |
| C | -0.80538200 | -3.65713300 | 0.55311900  |
| C | -2.17611400 | -3.93782300 | 0.60754800  |
| C | -3.08063400 | -2.93575800 | 0.28998200  |
| C | -2.65306100 | -1.65484500 | -0.07702700 |
| C | -1.26893500 | -1.36886400 | -0.09455700 |
| H | -4.14524800 | -3.15356700 | 0.32479200  |
| H | -0.08409800 | -4.43467700 | 0.79178000  |
| H | -2.52741500 | -4.92531500 | 0.88894200  |
| C | -3.59760200 | -0.60659800 | -0.52064300 |
| N | -4.85517200 | -0.69425300 | -0.70564600 |
| N | -0.84877900 | -0.11098900 | -0.43309400 |
| H | -5.17391400 | -1.64260000 | -0.52437900 |
| H | 0.14245800  | 0.12221000  | -0.25211800 |
| C | -0.35247000 | -2.39428900 | 0.21048200  |
| H | 0.71006600  | -2.17047500 | 0.18263400  |

### 3a-w

|                                              |                             |
|----------------------------------------------|-----------------------------|
| Zero-point correction=                       | 0.416570 (Hartree/Particle) |
| Thermal correction to Energy=                | 0.440368                    |
| Thermal correction to Enthalpy=              | 0.441343                    |
| Thermal correction to Gibbs Free Energy=     | 0.359924                    |
| Sum of electronic and zero-point Energies=   | -847.303514                 |
| Sum of electronic and thermal Energies=      | -847.279716                 |
| Sum of electronic and thermal Enthalpies=    | -847.278740                 |
| Sum of electronic and thermal Free Energies= | -847.360159                 |

|   |             |             |             |
|---|-------------|-------------|-------------|
| C | -1.62941600 | 0.25880300  | -0.73335600 |
| C | -3.70457200 | 1.14243000  | -0.33968300 |
| H | -4.78216700 | 1.15062200  | -0.26578600 |
| C | -2.79956600 | 2.13620400  | -0.15558700 |
| H | -2.94027800 | 3.17330900  | 0.11153800  |
| N | -2.97289000 | 0.02065900  | -0.68708300 |
| N | -1.55859700 | 1.57861500  | -0.39947400 |
| C | -0.30765600 | 2.31738500  | -0.30977700 |
| H | -0.38570700 | 3.20887100  | -0.94393700 |
| H | 0.45992400  | 1.67200700  | -0.74180600 |
| C | -3.56284400 | -1.27390800 | -0.97355800 |

|   |             |             |             |
|---|-------------|-------------|-------------|
| H | -2.74974700 | -1.89129400 | -1.36501800 |
| H | -4.30804300 | -1.15400400 | -1.76986600 |
| C | 0.06224500  | 2.72141600  | 1.11491500  |
| H | 1.00411000  | 3.27998400  | 1.05649400  |
| H | -0.69426100 | 3.41290600  | 1.51080900  |
| C | 0.22548000  | 1.53928300  | 2.06096700  |
| H | 0.49502000  | 1.87781000  | 3.06638700  |
| H | -0.69678800 | 0.95347500  | 2.13491900  |
| H | 1.01776600  | 0.86849800  | 1.71149600  |
| C | -4.19948200 | -1.93349200 | 0.24750700  |
| H | -5.00612000 | -1.29339600 | 0.62858500  |
| H | -4.68065700 | -2.86029500 | -0.09024900 |
| C | -3.20598800 | -2.23503100 | 1.36166400  |
| H | -2.71761900 | -1.32104100 | 1.71339000  |
| H | -3.70358700 | -2.70428800 | 2.21619400  |
| H | -2.41896300 | -2.91323200 | 1.01394000  |
| C | 1.69030900  | -1.50758400 | -1.29302300 |
| C | 1.38120000  | -2.40661500 | -0.08914300 |
| C | 2.64741400  | -2.90953600 | 0.59852700  |
| C | 3.53168200  | -1.74305900 | 1.03017600  |
| C | 3.90363400  | -0.85064500 | -0.15998800 |
| C | 2.69778800  | -0.43570400 | -0.96825000 |
| H | 2.38523400  | -3.52372800 | 1.46796900  |
| H | 0.77182400  | -1.83472100 | 0.62238000  |
| H | 0.75815000  | -3.24487100 | -0.42040900 |
| H | 2.13178200  | -2.11474000 | -2.09905700 |
| H | 0.78094200  | -1.03132300 | -1.67208300 |
| H | 3.00053400  | -1.14056700 | 1.77904300  |
| H | 4.44699000  | -2.10262500 | 1.51350400  |
| H | 4.45042300  | 0.04521600  | 0.14809500  |
| H | 4.55345600  | -1.41978000 | -0.84279100 |
| H | 3.20943100  | -3.56044100 | -0.08747200 |
| O | 2.55662900  | 0.71451200  | -1.36173800 |
| O | 3.63714900  | 2.86983500  | 0.09126900  |
| H | 3.32627900  | 2.16673300  | -0.50656000 |
| H | 4.08089200  | 3.51153800  | -0.46841100 |

### TS1a-w

|                                            |                             |
|--------------------------------------------|-----------------------------|
| Zero-point correction=                     | 0.416813 (Hartree/Particle) |
| Thermal correction to Energy=              | 0.437480                    |
| Thermal correction to Enthalpy=            | 0.438456                    |
| Thermal correction to Gibbs Free Energy=   | 0.367657                    |
| Sum of electronic and zero-point Energies= | -847.274565                 |
| Sum of electronic and thermal Energies=    | -847.253897                 |

Sum of electronic and thermal Enthalpies= -847.252921  
Sum of electronic and thermal Free Energies= -847.323721

|   |             |             |             |
|---|-------------|-------------|-------------|
| C | 0.63038900  | 0.01818400  | -0.48606200 |
| C | 2.41605300  | 1.22937800  | -1.18518100 |
| H | 2.97054900  | 2.11522800  | -1.45491700 |
| C | 2.77554100  | -0.07639400 | -1.19452800 |
| H | 3.70380600  | -0.55166600 | -1.47383900 |
| N | 1.10540900  | 1.26615000  | -0.74747100 |
| N | 1.67589100  | -0.79442100 | -0.77014600 |
| C | 1.70532600  | -2.25106300 | -0.61630300 |
| H | 2.18215700  | -2.65790300 | -1.51492600 |
| H | 0.66223900  | -2.57820800 | -0.57787500 |
| C | 0.37391400  | 2.51456900  | -0.57599900 |
| H | -0.64005600 | 2.25187400  | -0.27371300 |
| H | 0.31036300  | 3.01370100  | -1.55018300 |
| C | 2.46071100  | -2.68899100 | 0.63534300  |
| H | 2.49889900  | -3.78534200 | 0.61328900  |
| H | 3.50336700  | -2.34398400 | 0.58811100  |
| C | 1.80818100  | -2.22243600 | 1.93036800  |
| H | 2.33672300  | -2.62224500 | 2.80169300  |
| H | 1.81720200  | -1.12984500 | 2.00923400  |
| H | 0.76345100  | -2.54607300 | 1.97197200  |
| C | 1.01237500  | 3.44272000  | 0.45490100  |
| H | 2.01624800  | 3.73114900  | 0.11774100  |
| H | 0.42166700  | 4.36709600  | 0.46616500  |
| C | 1.08548000  | 2.84992500  | 1.85587600  |
| H | 1.67201600  | 1.92565800  | 1.86768200  |
| H | 1.55479800  | 3.55238600  | 2.55116800  |
| H | 0.08815000  | 2.61269400  | 2.24042500  |
| C | -1.66541800 | -0.06687300 | 1.12571700  |
| C | -3.17141500 | -0.29615200 | 1.30338600  |
| C | -3.95355400 | 0.22185600  | 0.09478600  |
| C | -3.45618600 | -0.40123400 | -1.21081000 |
| C | -1.95072900 | -0.17201200 | -1.39683500 |
| C | -1.23869300 | -0.76157600 | -0.17088300 |
| H | -5.02499200 | 0.02390300  | 0.22380700  |
| H | -3.34840600 | -1.37246000 | 1.42100000  |
| H | -3.52216000 | 0.19090500  | 2.22213500  |
| H | -1.46465400 | 1.01156500  | 1.09987200  |
| H | -1.09946100 | -0.49747100 | 1.95751100  |
| H | -3.64248800 | -1.48223700 | -1.19548900 |
| H | -4.00863900 | 0.01031600  | -2.06506600 |
| H | -1.58600400 | -0.68128400 | -2.29464100 |

|   |             |             |             |
|---|-------------|-------------|-------------|
| H | -1.75942000 | 0.90328300  | -1.51015800 |
| H | -3.84541300 | 1.31642800  | 0.03685800  |
| O | -1.12761300 | -2.01487200 | -0.12964900 |
| O | -0.00541524 | -4.34856762 | -0.50615965 |
| H | -0.07985570 | -5.30543709 | -0.52759384 |
| H | -0.88181404 | -3.96001627 | -0.45563247 |

#### 4a-w

|                                              |                             |
|----------------------------------------------|-----------------------------|
| Zero-point correction=                       | 0.420543 (Hartree/Particle) |
| Thermal correction to Energy=                | 0.442480                    |
| Thermal correction to Enthalpy=              | 0.443455                    |
| Thermal correction to Gibbs Free Energy=     | 0.368776                    |
| Sum of electronic and zero-point Energies=   | -847.310227                 |
| Sum of electronic and thermal Energies=      | -847.288290                 |
| Sum of electronic and thermal Enthalpies=    | -847.287314                 |
| Sum of electronic and thermal Free Energies= | -847.361993                 |

|   |             |             |             |
|---|-------------|-------------|-------------|
| C | 0.50434200  | 0.26863100  | -0.58278600 |
| C | 2.20044600  | 1.69795200  | -0.91633500 |
| H | 2.69589700  | 2.65303100  | -0.98481300 |
| C | 2.66526500  | 0.44539400  | -1.12088000 |
| H | 3.64631800  | 0.09309400  | -1.39673800 |
| N | 0.87023400  | 1.58018200  | -0.57650100 |
| N | 1.61838200  | -0.42161800 | -0.90994300 |
| C | 1.81747600  | -1.88093700 | -1.02693000 |
| H | 2.16556000  | -2.06214900 | -2.05003000 |
| H | 0.81994200  | -2.31003300 | -0.89684600 |
| C | 0.06231700  | 2.76960900  | -0.29317600 |
| H | -0.93049700 | 2.44010300  | 0.00059600  |
| H | -0.03929800 | 3.33321700  | -1.22740000 |
| C | 2.82857900  | -2.39754100 | -0.00907700 |
| H | 2.92404900  | -3.47352700 | -0.19986500 |
| H | 3.82302700  | -1.96873800 | -0.20172200 |
| C | 2.42388100  | -2.16898600 | 1.44193700  |
| H | 3.17443100  | -2.59021200 | 2.11877800  |
| H | 2.34656700  | -1.09902800 | 1.67064000  |
| H | 1.45779900  | -2.63803100 | 1.65773300  |
| C | 0.66928100  | 3.64905300  | 0.79778600  |
| H | 1.62812600  | 4.06061300  | 0.45872100  |
| H | 0.00059300  | 4.51144400  | 0.90749200  |
| C | 0.84662500  | 2.95001700  | 2.13959200  |
| H | 1.50926000  | 2.08235400  | 2.05728900  |

|   |             |             |             |
|---|-------------|-------------|-------------|
| H | 1.28421300  | 3.63272500  | 2.87371900  |
| H | -0.10997200 | 2.59808500  | 2.53775200  |
| C | -1.48878500 | 0.02950700  | 0.99516900  |
| C | -2.93745400 | -0.43986100 | 1.11277200  |
| C | -3.81018100 | 0.13721900  | -0.00031600 |
| C | -3.24421100 | -0.20365800 | -1.37770900 |
| C | -1.81006700 | 0.29489200  | -1.52392300 |
| C | -0.92356600 | -0.34624300 | -0.40804100 |
| H | -4.83658300 | -0.23929900 | 0.09168600  |
| H | -2.95172900 | -1.53349400 | 1.06379500  |
| H | -3.33265900 | -0.15812000 | 2.09681800  |
| H | -1.44983600 | 1.10795500  | 1.19926100  |
| H | -0.87060800 | -0.46778000 | 1.75145100  |
| H | -3.23889100 | -1.29099600 | -1.51272700 |
| H | -3.86985600 | 0.22774600  | -2.16947400 |
| H | -1.39559400 | -0.01811100 | -2.48981400 |
| H | -1.80625900 | 1.39419800  | -1.50224200 |
| H | -3.87138800 | 1.23232900  | 0.10965300  |
| O | -0.89982800 | -1.67952900 | -0.57010400 |
| O | -0.71138800 | -3.29029900 | 1.45778000  |
| H | -1.29058200 | -4.03735300 | 1.29203800  |
| H | -0.83629800 | -2.66164200 | 0.67944900  |

### 5a-w

|                                              |                             |
|----------------------------------------------|-----------------------------|
| Zero-point correction=                       | 0.536597 (Hartree/Particle) |
| Thermal correction to Energy=                | 0.568498                    |
| Thermal correction to Enthalpy=              | 0.569473                    |
| Thermal correction to Gibbs Free Energy=     | 0.473116                    |
| Sum of electronic and zero-point Energies=   | -1226.742212                |
| Sum of electronic and thermal Energies=      | -1226.710312                |
| Sum of electronic and thermal Enthalpies=    | -1226.709336                |
| Sum of electronic and thermal Free Energies= | -1226.805693                |

|   |            |             |             |
|---|------------|-------------|-------------|
| C | 1.77052300 | 0.39807700  | 0.16080600  |
| C | 2.96636600 | -1.02086300 | 1.39705600  |
| H | 3.34600500 | -1.47706900 | 2.29595100  |
| C | 3.12519000 | -1.37817300 | 0.10356700  |
| H | 3.65176700 | -2.21538900 | -0.31850800 |
| N | 2.13456800 | 0.07121000  | 1.42001300  |
| N | 2.38731200 | -0.49402000 | -0.65407500 |
| C | 2.33653300 | -0.52919200 | -2.12402800 |
| H | 2.76441400 | 0.40997700  | -2.48658400 |
| H | 1.28688900 | -0.56289200 | -2.41847800 |

|   |             |             |             |
|---|-------------|-------------|-------------|
| C | 1.80005300  | 0.78592200  | 2.66390900  |
| H | 1.00879900  | 1.48875400  | 2.38070500  |
| H | 2.70115900  | 1.32707300  | 2.97594600  |
| C | 3.07254500  | -1.69997900 | -2.76379500 |
| H | 3.16666600  | -1.43407200 | -3.82373800 |
| H | 4.10292600  | -1.75444100 | -2.39078000 |
| C | 2.36779400  | -3.04937500 | -2.65526500 |
| H | 2.93552500  | -3.81765000 | -3.18993100 |
| H | 2.23154600  | -3.38933600 | -1.62424500 |
| H | 1.37283800  | -2.99605700 | -3.11067600 |
| C | 1.32377700  | -0.14714000 | 3.77110300  |
| H | 2.11702400  | -0.84794500 | 4.06501600  |
| H | 1.15698200  | 0.49107200  | 4.64798700  |
| C | 0.04820600  | -0.90670400 | 3.42965200  |
| H | 0.19881400  | -1.58059900 | 2.58109100  |
| H | -0.28150600 | -1.50954900 | 4.28185800  |
| H | -0.75753800 | -0.21861800 | 3.15704800  |
| C | 1.82341200  | 2.86700000  | -0.07183000 |
| C | 1.03256500  | 4.15411400  | -0.28998800 |
| C | 0.29082700  | 4.13669800  | -1.62444900 |
| C | -0.58753600 | 2.89319900  | -1.74750100 |
| C | 0.23778600  | 1.62221500  | -1.55180600 |
| C | 0.86779300  | 1.63198900  | -0.13346100 |
| H | -0.31435500 | 5.04518500  | -1.73490700 |
| H | 0.30851600  | 4.24622000  | 0.52813300  |
| H | 1.70533700  | 5.01933000  | -0.23456100 |
| H | 2.61539800  | 2.77472400  | -0.83271200 |
| H | 2.31631800  | 2.89500300  | 0.90731200  |
| H | -1.37747500 | 2.92164200  | -0.98943100 |
| H | -1.07465000 | 2.86489400  | -2.73027400 |
| H | -0.39876000 | 0.73594400  | -1.65972400 |
| H | 0.99822400  | 1.59799600  | -2.34175200 |
| H | 1.02184700  | 4.14653700  | -2.44812100 |
| O | -0.09588200 | 1.69575700  | 0.81515700  |
| C | -5.70904300 | -0.43350300 | -0.30328400 |
| C | -5.27195500 | -1.62233800 | -0.91047100 |
| C | -3.92682900 | -1.92782100 | -0.85998800 |
| C | -3.00632300 | -1.07081500 | -0.22298700 |
| C | -3.43121100 | 0.15070900  | 0.37838200  |
| H | -3.55194000 | -2.84456900 | -1.30612100 |
| H | -6.76452700 | -0.17431800 | -0.32491000 |
| H | -5.97305900 | -2.28831700 | -1.40163400 |
| C | -1.65501300 | -1.49729900 | -0.15832300 |
| N | -0.56571100 | -1.90968800 | -0.12415100 |



|   |             |             |            |
|---|-------------|-------------|------------|
| N | -2.58635500 | 0.99484100  | 0.99842200 |
| H | -1.53503700 | 1.09167300  | 0.82206100 |
| H | -3.00123300 | 1.85097100  | 1.33415700 |
| C | -4.82384700 | 0.42226800  | 0.31761100 |
| H | -5.18610200 | 1.34080100  | 0.77295300 |
| O | 1.36472300  | -3.99322000 | 0.58433000 |
| H | 0.72541400  | -3.28454500 | 0.39155400 |
| H | 0.83466300  | -4.78307400 | 0.71850100 |

### TS2a<sub>7</sub>-w

|                                              |                             |
|----------------------------------------------|-----------------------------|
| Zero-point correction=                       | 0.538483 (Hartree/Particle) |
| Thermal correction to Energy=                | 0.568119                    |
| Thermal correction to Enthalpy=              | 0.569095                    |
| Thermal correction to Gibbs Free Energy=     | 0.479092                    |
| Sum of electronic and zero-point Energies=   | -1226.722056                |
| Sum of electronic and thermal Energies=      | -1226.692420                |
| Sum of electronic and thermal Enthalpies=    | -1226.691444                |
| Sum of electronic and thermal Free Energies= | -1226.781448                |

|   |             |             |             |
|---|-------------|-------------|-------------|
| C | 1.51154400  | 0.35923900  | 0.50315000  |
| C | 2.60905700  | -1.08904400 | 1.79876800  |
| H | 2.76800100  | -1.75257800 | 2.63161700  |
| C | 3.37024900  | -0.86113800 | 0.70799200  |
| H | 4.30733700  | -1.30066700 | 0.41581300  |
| N | 1.47198600  | -0.32657000 | 1.67051100  |
| N | 2.69338500  | 0.04304500  | -0.08286300 |
| C | 3.17153900  | 0.47481700  | -1.40458000 |
| H | 3.47552100  | 1.52294800  | -1.32774500 |
| H | 2.32382600  | 0.40617200  | -2.08678600 |
| C | 0.41834400  | -0.30053800 | 2.69639700  |
| H | -0.46637300 | 0.10950100  | 2.20907800  |
| H | 0.74074400  | 0.38992500  | 3.48517000  |
| C | 4.32654100  | -0.34611100 | -1.96532700 |
| H | 4.70081800  | 0.23153400  | -2.81955800 |
| H | 5.16307800  | -0.37075400 | -1.25552200 |
| C | 3.94676200  | -1.74696300 | -2.43420500 |
| H | 4.82920200  | -2.27951600 | -2.80323900 |
| H | 3.47512900  | -2.35385100 | -1.65512500 |
| H | 3.22647800  | -1.68732400 | -3.25716400 |
| C | 0.11611100  | -1.66791000 | 3.29955000  |
| H | 0.99161600  | -2.05709700 | 3.83606700  |
| H | -0.63835300 | -1.48175800 | 4.07411200  |

|   |             |             |             |
|---|-------------|-------------|-------------|
| C | -0.40482200 | -2.70014600 | 2.30774000  |
| H | 0.32208400  | -2.91863900 | 1.51908300  |
| H | -0.63498400 | -3.63806000 | 2.82359000  |
| H | -1.32106300 | -2.34609200 | 1.82546800  |
| C | 0.78828300  | 2.62033700  | 1.17784600  |
| C | -0.17033800 | 3.79653500  | 1.00242700  |
| C | -0.15276900 | 4.33156900  | -0.42601300 |
| C | -0.40253600 | 3.20765000  | -1.42709500 |
| C | 0.60798700  | 2.07506600  | -1.25146800 |
| C | 0.48564400  | 1.47523500  | 0.16942300  |
| H | -0.89977400 | 5.12598900  | -0.54316300 |
| H | -1.18424300 | 3.46192500  | 1.25268200  |
| H | 0.09310900  | 4.58779800  | 1.71540000  |
| H | 1.82460100  | 2.95906800  | 1.02607600  |
| H | 0.72229700  | 2.24331500  | 2.20305700  |
| H | -1.41232800 | 2.80407800  | -1.29282700 |
| H | -0.33884300 | 3.58917100  | -2.45335900 |
| H | 0.41865800  | 1.29023800  | -1.98833800 |
| H | 1.60994300  | 2.48505200  | -1.42427100 |
| H | 0.82691800  | 4.79010500  | -0.63075600 |
| O | -0.79364100 | 1.01040100  | 0.36111200  |
| C | -5.23046700 | -1.16368800 | -1.23114200 |
| C | -4.27623800 | -1.61836000 | -2.14336500 |
| C | -2.93768800 | -1.36623700 | -1.88499600 |
| C | -2.51094500 | -0.65813300 | -0.74816200 |
| C | -3.48232200 | -0.18964900 | 0.17144300  |
| H | -2.16999400 | -1.71732100 | -2.56790300 |
| H | -6.28759900 | -1.34906100 | -1.40284900 |
| H | -4.57099500 | -2.16068100 | -3.03621600 |
| C | -1.05321700 | -0.55567700 | -0.62338800 |
| N | -0.05153700 | -1.09613400 | -0.98101600 |
| N | -3.15164300 | 0.46638500  | 1.33819500  |
| H | -2.27502800 | 0.98602800  | 1.27588200  |
| H | -3.91673700 | 0.96299500  | 1.76900400  |
| C | -4.83645700 | -0.46851600 | -0.10029200 |
| H | -5.58522400 | -0.12142800 | 0.60878800  |
| O | 1.51820700  | -3.37968100 | -0.72570900 |
| H | 0.94854800  | -2.59327600 | -0.89004200 |
| H | 1.03619600  | -4.12061300 | -1.10126700 |

### 6a<sub>1</sub>-w

Zero-point correction= 0.540076 (Hartree/Particle)  
Thermal correction to Energy= 0.570401

|                                              |              |
|----------------------------------------------|--------------|
| Thermal correction to Enthalpy=              | 0.571377     |
| Thermal correction to Gibbs Free Energy=     | 0.480208     |
| Sum of electronic and zero-point Energies=   | -1226.757079 |
| Sum of electronic and thermal Energies=      | -1226.726754 |
| Sum of electronic and thermal Enthalpies=    | -1226.725779 |
| Sum of electronic and thermal Free Energies= | -1226.816947 |

|   |             |             |             |
|---|-------------|-------------|-------------|
| C | 1.06664300  | 0.24932300  | 0.11990600  |
| C | 2.98260700  | 0.02490100  | 1.42929000  |
| H | 3.56952000  | 0.01366200  | 2.33555900  |
| C | 3.39101900  | 0.11513100  | 0.15416100  |
| H | 4.39566700  | 0.18477700  | -0.23216000 |
| N | 1.58794800  | 0.00207700  | 1.45790500  |
| N | 2.27515300  | 0.16804600  | -0.69008900 |
| C | 2.26783800  | -0.27628700 | -2.07544500 |
| H | 2.21168200  | 0.58887500  | -2.75383600 |
| H | 1.35426000  | -0.86347900 | -2.23177200 |
| C | 0.79956100  | -0.32965800 | 2.61777100  |
| H | -0.22969300 | -0.49579500 | 2.28377100  |
| H | 0.76931100  | 0.51550300  | 3.32758100  |
| C | 3.47616700  | -1.11331400 | -2.49171400 |
| H | 3.37742500  | -1.26802400 | -3.57394300 |
| H | 4.39601500  | -0.52656100 | -2.36645200 |
| C | 3.60455500  | -2.46406400 | -1.79738900 |
| H | 4.45441700  | -3.02471600 | -2.20165100 |
| H | 3.76311000  | -2.34718200 | -0.72016300 |
| H | 2.69637700  | -3.05938600 | -1.93305400 |
| C | 1.27913100  | -1.57430900 | 3.36853300  |
| H | 2.28747400  | -1.39798900 | 3.76454900  |
| H | 0.62979700  | -1.69697800 | 4.24493100  |
| C | 1.27166100  | -2.84090300 | 2.52490700  |
| H | 1.94174500  | -2.73462400 | 1.66567400  |
| H | 1.60288300  | -3.70521100 | 3.10966100  |
| H | 0.26418800  | -3.05123100 | 2.14821400  |
| C | 0.65005400  | 2.64829600  | 1.06680300  |
| C | -0.09927600 | 3.97233100  | 0.91125500  |
| C | 0.07440000  | 4.56587300  | -0.48363800 |
| C | -0.34017400 | 3.55711300  | -1.55055200 |
| C | 0.43848800  | 2.25039400  | -1.40743600 |
| C | 0.30793500  | 1.63663400  | -0.01491700 |
| H | -0.50773800 | 5.48993700  | -0.58074900 |
| H | -1.16874100 | 3.80900900  | 1.10527900  |
| H | 0.24657100  | 4.67713400  | 1.67656500  |
| H | 1.73323400  | 2.81845800  | 1.00839300  |

|   |             |             |             |
|---|-------------|-------------|-------------|
| H | 0.45383000  | 2.21554200  | 2.05082000  |
| H | -1.41644900 | 3.35394300  | -1.46640700 |
| H | -0.17951800 | 3.96816800  | -2.55413200 |
| H | 0.10891100  | 1.52227000  | -2.15715300 |
| H | 1.50536300  | 2.43324800  | -1.58302900 |
| H | 1.12871500  | 4.84041200  | -0.63361200 |
| O | -1.07863800 | 1.22102400  | 0.14167400  |
| C | -4.90818700 | -2.00481700 | -0.63775700 |
| C | -3.72370100 | -2.66731900 | -0.97390800 |
| C | -2.51621300 | -2.02022800 | -0.78395300 |
| C | -2.44651700 | -0.71319100 | -0.26637400 |
| C | -3.65136300 | -0.04338000 | 0.08123000  |
| H | -1.59436600 | -2.53035100 | -1.04433300 |
| H | -5.86905400 | -2.49215900 | -0.78056300 |
| H | -3.74332700 | -3.67230600 | -1.38224800 |
| C | -1.11883400 | -0.10795600 | -0.12613500 |
| N | 0.01588200  | -0.71016200 | -0.23606000 |
| N | -3.69284300 | 1.20157300  | 0.65962000  |
| H | -2.87410200 | 1.78368100  | 0.58191200  |
| H | -4.58231000 | 1.67294500  | 0.65402900  |
| C | -4.86930500 | -0.72395700 | -0.12004800 |
| H | -5.79370700 | -0.21838200 | 0.14983900  |
| O | 0.45597700  | -3.44210600 | -0.97423200 |
| H | 0.40770500  | -2.52454000 | -0.63150100 |
| H | 0.72017000  | -3.98442000 | -0.22672500 |

### TS2a<sub>2</sub>-w

|                                              |             |             |                             |
|----------------------------------------------|-------------|-------------|-----------------------------|
| Zero-point correction=                       |             |             | 0.538335 (Hartree/Particle) |
| Thermal correction to Energy=                |             |             | 0.568976                    |
| Thermal correction to Enthalpy=              |             |             | 0.569952                    |
| Thermal correction to Gibbs Free Energy=     |             |             | 0.477859                    |
| Sum of electronic and zero-point Energies=   |             |             | -1226.722705                |
| Sum of electronic and thermal Energies=      |             |             | -1226.692063                |
| Sum of electronic and thermal Enthalpies=    |             |             | -1226.691087                |
| Sum of electronic and thermal Free Energies= |             |             | -1226.783180                |
| C                                            | -1.60731300 | 0.37793200  | 0.51901400                  |
| C                                            | -3.26782100 | -1.09579600 | 0.76306600                  |
| H                                            | -4.11387400 | -1.69636400 | 0.47945900                  |
| C                                            | -2.53131200 | -1.11534900 | 1.89527300                  |
| H                                            | -2.62851500 | -1.72501300 | 2.77757600                  |
| N                                            | -2.69097300 | -0.17163300 | -0.08193200                 |
| N                                            | -1.51286700 | -0.20747400 | 1.73489600                  |
| C                                            | -0.52464100 | 0.08603800  | 2.78610500                  |

|   |             |             |             |
|---|-------------|-------------|-------------|
| H | -0.99482700 | 0.77761600  | 3.49530800  |
| H | 0.29254500  | 0.59888900  | 2.26642400  |
| C | -3.20127600 | 0.12386100  | -1.42937200 |
| H | -2.34372600 | 0.13985500  | -2.10141900 |
| H | -3.64195900 | 1.12545800  | -1.40769500 |
| C | -0.03396200 | -1.15646800 | 3.51928700  |
| H | 0.65338600  | -0.78745100 | 4.29084100  |
| H | -0.85437400 | -1.63667200 | 4.06973300  |
| C | 0.67787800  | -2.17404800 | 2.63669200  |
| H | 1.05330400  | -3.00668800 | 3.24039000  |
| H | 0.01190200  | -2.58708900 | 1.87223200  |
| H | 1.52959600  | -1.71746800 | 2.12317700  |
| C | -4.22509500 | -0.87481300 | -1.95336300 |
| H | -5.06870700 | -0.96472500 | -1.25738900 |
| H | -4.64886000 | -0.40827500 | -2.85116300 |
| C | -3.65633700 | -2.24207200 | -2.32014300 |
| H | -3.15811100 | -2.74423000 | -1.48546700 |
| H | -4.44979600 | -2.89921800 | -2.69023800 |
| H | -2.91014800 | -2.14269800 | -3.11575700 |
| C | -0.77170400 | 1.96648700  | -1.38238100 |
| C | 0.14387000  | 3.16203400  | -1.63974200 |
| C | -0.26698500 | 4.36385700  | -0.79330200 |
| C | -0.30645000 | 3.99746000  | 0.68755400  |
| C | -1.18041300 | 2.77187000  | 0.94147800  |
| C | -0.66962300 | 1.55006300  | 0.10899300  |
| H | 0.41920600  | 5.20367000  | -0.95889200 |
| H | 1.17258900  | 2.87125800  | -1.39978000 |
| H | 0.11516100  | 3.41851700  | -2.70614400 |
| H | -1.79478300 | 2.26020400  | -1.65097000 |
| H | -0.47115800 | 1.12600500  | -2.01408500 |
| H | 0.70792200  | 3.76723000  | 1.03388700  |
| H | -0.67375900 | 4.84182200  | 1.28464800  |
| H | -1.16567600 | 2.52697200  | 2.00873900  |
| H | -2.22631400 | 2.99109500  | 0.67344100  |
| H | -1.26413200 | 4.70736000  | -1.11021600 |
| O | 0.61245000  | 1.24289400  | 0.43487300  |
| C | 5.43237800  | -0.24850900 | -0.34788200 |
| C | 4.66338000  | 0.76185600  | 0.23583000  |
| C | 3.27990600  | 0.69141800  | 0.16311300  |
| C | 2.64795500  | -0.37966200 | -0.48106400 |
| C | 3.42722700  | -1.41147700 | -1.07293300 |
| H | 2.63689500  | 1.45462600  | 0.58522700  |
| H | 6.51746700  | -0.20336700 | -0.30207300 |
| H | 5.14089200  | 1.59827700  | 0.73641300  |

|   |             |             |             |
|---|-------------|-------------|-------------|
| C | 1.21726300  | -0.52209800 | -0.61128800 |
| N | 0.30411700  | -1.15635400 | -1.01438100 |
| N | 2.83784300  | -2.49732400 | -1.67429300 |
| H | 1.85643300  | -2.39966900 | -1.90495300 |
| H | 3.39806500  | -3.00962300 | -2.33609100 |
| C | 4.82725900  | -1.31666600 | -0.99100500 |
| H | 5.43363700  | -2.10177400 | -1.43668100 |
| O | -1.15701600 | -3.50855600 | -0.35147600 |
| H | -0.67417600 | -2.70146900 | -0.62244800 |
| H | -0.51152300 | -4.21779100 | -0.40682700 |

**6a<sub>2</sub>-w**

|                                              |                             |
|----------------------------------------------|-----------------------------|
| Zero-point correction=                       | 0.539245 (Hartree/Particle) |
| Thermal correction to Energy=                | 0.569977                    |
| Thermal correction to Enthalpy=              | 0.570953                    |
| Thermal correction to Gibbs Free Energy=     | 0.478843                    |
| Sum of electronic and zero-point Energies=   | -1226.763164                |
| Sum of electronic and thermal Energies=      | -1226.732432                |
| Sum of electronic and thermal Enthalpies=    | -1226.731456                |
| Sum of electronic and thermal Free Energies= | -1226.823567                |

|   |             |             |             |
|---|-------------|-------------|-------------|
| C | 1.17908000  | -0.16600100 | 0.10047800  |
| C | 2.87668100  | -1.34064400 | 1.19433200  |
| H | 3.44348800  | -1.71525000 | 2.03328300  |
| C | 3.20993300  | -1.29308800 | -0.10369500 |
| H | 4.11453600  | -1.62513600 | -0.59017700 |
| N | 1.63071800  | -0.73824500 | 1.36397600  |
| N | 2.19660500  | -0.64354800 | -0.82007700 |
| C | 1.97998500  | -0.90052200 | -2.23335100 |
| H | 2.71326000  | -0.32557800 | -2.82026800 |
| H | 0.99814100  | -0.50838500 | -2.50585400 |
| C | 0.85865600  | -0.79858000 | 2.58143600  |
| H | -0.16345600 | -0.48431900 | 2.34716100  |
| H | 1.24452000  | -0.07944300 | 3.32459000  |
| C | 2.07202500  | -2.37119500 | -2.64731300 |
| H | 1.98918900  | -2.40352700 | -3.74130300 |
| H | 3.07266000  | -2.75228700 | -2.40688600 |
| C | 1.01712500  | -3.27206100 | -2.02049400 |
| H | 1.17231300  | -4.31581800 | -2.31334800 |
| H | 1.05727400  | -3.21889900 | -0.92805400 |
| H | 0.01178900  | -2.98023900 | -2.34184000 |
| C | 0.81171400  | -2.18385400 | 3.23082400  |
| H | 1.82534000  | -2.48415800 | 3.52600100  |

|   |             |             |             |
|---|-------------|-------------|-------------|
| H | 0.24724600  | -2.08333800 | 4.16695800  |
| C | 0.18897800  | -3.26108700 | 2.35447300  |
| H | 0.74715300  | -3.37203400 | 1.41960600  |
| H | 0.18934200  | -4.22997600 | 2.86447900  |
| H | -0.84681300 | -3.01232400 | 2.09981700  |
| C | 1.87421800  | 2.09521100  | 1.20181900  |
| C | 1.71430400  | 3.61573600  | 1.20937600  |
| C | 1.97726500  | 4.22107700  | -0.16629500 |
| C | 1.08209700  | 3.56967200  | -1.21600800 |
| C | 1.26331700  | 2.05257900  | -1.23859800 |
| C | 1.03744600  | 1.41445500  | 0.13168900  |
| H | 1.81474200  | 5.30525900  | -0.14332900 |
| H | 0.69339000  | 3.86666900  | 1.52720100  |
| H | 2.38970600  | 4.04807200  | 1.95719800  |
| H | 2.92023300  | 1.82425100  | 1.00526500  |
| H | 1.62257700  | 1.68435000  | 2.18249500  |
| H | 0.03241500  | 3.80803600  | -0.99865100 |
| H | 1.29532800  | 3.97474600  | -2.21220000 |
| H | 0.58403600  | 1.60124400  | -1.97070900 |
| H | 2.28450400  | 1.80334400  | -1.55153700 |
| H | 3.03158900  | 4.06631800  | -0.43891600 |
| O | -0.37448200 | 1.57605300  | 0.45616800  |
| C | -5.21934800 | 0.46731300  | 0.15123800  |
| C | -4.50320400 | 1.66548900  | 0.26292300  |
| C | -3.12048600 | 1.61696000  | 0.25560200  |
| C | -2.42604800 | 0.40127600  | 0.13521400  |
| C | -3.15405000 | -0.81732100 | 0.03474300  |
| H | -2.53735400 | 2.52843600  | 0.33682400  |
| H | -6.30603800 | 0.48220000  | 0.15156300  |
| H | -5.02124800 | 2.61464400  | 0.35092600  |
| C | -0.96817000 | 0.41680300  | 0.11366100  |
| N | -0.20305500 | -0.57733200 | -0.20409100 |
| N | -2.52945400 | -2.02464400 | -0.03221700 |
| H | -1.52345700 | -2.03096800 | -0.17289900 |
| H | -3.06647400 | -2.83716800 | -0.28300600 |
| C | -4.56299900 | -0.74514900 | 0.04255200  |
| H | -5.13203000 | -1.66856100 | -0.03291200 |
| O | -1.41751100 | -0.67980500 | -3.09130500 |
| H | -1.07494400 | -0.80946300 | -2.19438100 |
| H | -2.28181700 | -0.27671900 | -2.96678100 |

**TS3a-w**

Zero-point correction=

0.540332 (Hartree/Particle)

|                                              |              |
|----------------------------------------------|--------------|
| Thermal correction to Energy=                | 0.569443     |
| Thermal correction to Enthalpy=              | 0.570419     |
| Thermal correction to Gibbs Free Energy=     | 0.482234     |
| Sum of electronic and zero-point Energies=   | -1226.731985 |
| Sum of electronic and thermal Energies=      | -1226.702875 |
| Sum of electronic and thermal Enthalpies=    | -1226.701899 |
| Sum of electronic and thermal Free Energies= | -1226.790083 |

|   |             |             |             |
|---|-------------|-------------|-------------|
| C | -1.54714900 | 0.20488300  | -0.38249400 |
| C | -2.89659700 | -0.75323800 | -1.90818600 |
| H | -3.24310900 | -1.03572100 | -2.88864500 |
| C | -3.38693200 | -1.04734200 | -0.69019600 |
| H | -4.23984500 | -1.64277000 | -0.41271200 |
| N | -1.78827000 | 0.05848100  | -1.72386000 |
| N | -2.58560900 | -0.42592900 | 0.25781600  |
| C | -2.59584700 | -0.80353200 | 1.68045700  |
| H | -3.13301100 | -0.03842800 | 2.25069100  |
| H | -1.55461500 | -0.83066300 | 2.01086400  |
| C | -0.92164600 | 0.47511800  | -2.82824200 |
| H | -0.01532000 | 0.89633500  | -2.39233500 |
| H | -1.42988100 | 1.27343700  | -3.38427700 |
| C | -3.20192300 | -2.17411100 | 1.96187600  |
| H | -3.23202900 | -2.25266000 | 3.05531000  |
| H | -4.25053900 | -2.22051600 | 1.63921400  |
| C | -2.39205800 | -3.33892700 | 1.40359900  |
| H | -2.85249300 | -4.29428700 | 1.67523500  |
| H | -2.31954700 | -3.30287600 | 0.31166500  |
| H | -1.37645000 | -3.31579000 | 1.81126500  |
| C | -0.55966700 | -0.65756700 | -3.78742100 |
| H | -1.46533200 | -1.03235400 | -4.28132000 |
| H | 0.03800300  | -0.19682500 | -4.58409500 |
| C | 0.21256500  | -1.80920600 | -3.15904100 |
| H | -0.36573600 | -2.30077300 | -2.37148100 |
| H | 0.45837700  | -2.56079500 | -3.91557100 |
| H | 1.14809800  | -1.46589500 | -2.70712000 |
| C | -1.35457000 | 2.71067300  | -0.53805400 |
| C | -0.63902500 | 3.98728800  | -0.09814700 |
| C | -0.65615500 | 4.14894100  | 1.41739800  |
| C | -0.08464200 | 2.90497100  | 2.08761600  |
| C | -0.82348300 | 1.63678600  | 1.65930800  |
| C | -0.78934600 | 1.45034100  | 0.13369000  |
| H | -0.08922600 | 5.03964000  | 1.71212300  |
| H | 0.39897400  | 3.95399000  | -0.45120100 |
| H | -1.11328100 | 4.84657100  | -0.58687200 |



|   |             |             |             |
|---|-------------|-------------|-------------|
| H | -2.41855500 | 2.76818100  | -0.27066600 |
| H | -1.30710300 | 2.61907300  | -1.62512900 |
| H | 0.97844000  | 2.80423100  | 1.83868300  |
| H | -0.14450100 | 2.99087900  | 3.17852500  |
| H | -0.37455700 | 0.76847400  | 2.14806700  |
| H | -1.86876200 | 1.70728100  | 1.98220300  |
| H | -1.69064900 | 4.30699600  | 1.75722400  |
| O | 0.58267900  | 1.32789300  | -0.25903500 |
| C | 5.24640700  | -0.47132600 | -0.07222000 |
| C | 4.70795700  | 0.79823300  | -0.37471600 |
| C | 3.33831100  | 0.95476500  | -0.33437400 |
| C | 2.48196800  | -0.11320600 | 0.00065200  |
| C | 3.01236900  | -1.40957400 | 0.36349000  |
| H | 2.89111500  | 1.91544400  | -0.57468900 |
| H | 6.32386000  | -0.61863200 | -0.11072600 |
| H | 5.35648200  | 1.62746100  | -0.63841000 |
| C | 1.05512800  | 0.05523800  | -0.03181900 |
| N | 0.15241900  | -0.84422100 | 0.11134800  |
| N | 2.20311200  | -2.39950500 | 0.75554200  |
| H | 0.58756300  | -1.77650700 | 0.26465300  |
| H | 2.74167700  | -3.24669200 | 0.92170700  |
| C | 4.43973500  | -1.52832100 | 0.27659800  |
| H | 4.88132600  | -2.49422300 | 0.51508500  |
| O | 0.51272900  | -1.92694400 | 2.96638200  |
| H | 1.14301800  | -2.08744200 | 2.21476200  |
| H | 1.03039200  | -2.05883000 | 3.76463500  |

### 7a-w

|                                              |                             |
|----------------------------------------------|-----------------------------|
| Zero-point correction=                       | 0.541340 (Hartree/Particle) |
| Thermal correction to Energy=                | 0.571092                    |
| Thermal correction to Enthalpy=              | 0.572068                    |
| Thermal correction to Gibbs Free Energy=     | 0.481984                    |
| Sum of electronic and zero-point Energies=   | -1226.737563                |
| Sum of electronic and thermal Energies=      | -1226.707811                |
| Sum of electronic and thermal Enthalpies=    | -1226.706835                |
| Sum of electronic and thermal Free Energies= | -1226.796919                |

|   |            |             |            |
|---|------------|-------------|------------|
| C | 1.70973200 | 0.49929900  | 0.11882000 |
| C | 3.31781600 | 0.10079200  | 1.61012000 |
| H | 3.83122100 | 0.15088000  | 2.55583800 |
| C | 3.62915100 | -0.56591100 | 0.47775200 |
| H | 4.46334900 | -1.21011000 | 0.25962500 |

|   |             |             |             |
|---|-------------|-------------|-------------|
| N | 2.13711500  | 0.77181300  | 1.37578000  |
| N | 2.63950000  | -0.30779300 | -0.44764400 |
| C | 2.49527300  | -1.07129500 | -1.70305100 |
| H | 2.82907900  | -0.44040800 | -2.53251000 |
| H | 1.43351600  | -1.29735200 | -1.81973800 |
| C | 1.43370000  | 1.52877200  | 2.42154000  |
| H | 0.42438400  | 1.71581300  | 2.05480500  |
| H | 1.94614400  | 2.48990600  | 2.54697400  |
| C | 3.24875700  | -2.39502400 | -1.71474600 |
| H | 3.14511300  | -2.76556700 | -2.74150000 |
| H | 4.32744300  | -2.24834900 | -1.56941200 |
| C | 2.68395400  | -3.43772700 | -0.75591900 |
| H | 3.22507700  | -4.38415000 | -0.85345600 |
| H | 2.74967500  | -3.12028800 | 0.28960100  |
| H | 1.62803300  | -3.61527200 | -0.98152400 |
| C | 1.36991500  | 0.79425800  | 3.75825900  |
| H | 2.38083600  | 0.63957300  | 4.15654100  |
| H | 0.88697400  | 1.49000000  | 4.45577200  |
| C | 0.60318200  | -0.52065200 | 3.72046400  |
| H | 1.04437600  | -1.22768200 | 3.01230600  |
| H | 0.59489100  | -0.98614500 | 4.71068800  |
| H | -0.43411400 | -0.36636600 | 3.40883400  |
| C | 0.99619700  | 2.80117800  | -0.50307200 |
| C | -0.06341400 | 3.72003900  | -1.10921100 |
| C | -0.39216200 | 3.32671300  | -2.54425400 |
| C | -0.78149100 | 1.85506500  | -2.61208400 |
| C | 0.29616700  | 0.94517700  | -2.02054500 |
| C | 0.59461600  | 1.31189500  | -0.55512400 |
| H | -1.19857800 | 3.95718000  | -2.93627900 |
| H | -0.97154500 | 3.66952400  | -0.49690500 |
| H | 0.29733900  | 4.75447400  | -1.06067800 |
| H | 1.93712600  | 2.90085200  | -1.06164900 |
| H | 1.20468500  | 3.11164800  | 0.52316200  |
| H | -1.72324900 | 1.69116500  | -2.07572800 |
| H | -0.95603100 | 1.54896100  | -3.64976300 |
| H | -0.03503500 | -0.09393000 | -2.09148400 |
| H | 1.21596700  | 1.05546300  | -2.60807600 |
| H | 0.48629500  | 3.50505900  | -3.18271700 |
| O | -0.60524600 | 1.17429100  | 0.20177100  |
| C | -5.22130800 | -0.67374300 | 0.61622700  |
| C | -4.67974200 | 0.62536700  | 0.69871100  |
| C | -3.31148100 | 0.77172200  | 0.57546200  |
| C | -2.45929700 | -0.33043200 | 0.37452400  |
| C | -2.99701500 | -1.66733900 | 0.24036000  |

|   |             |             |             |
|---|-------------|-------------|-------------|
| H | -2.86373400 | 1.75913400  | 0.64892600  |
| H | -6.29525800 | -0.81563100 | 0.72090400  |
| H | -5.32036400 | 1.48638500  | 0.86111200  |
| C | -1.02483500 | -0.15181900 | 0.32248000  |
| N | -0.10652700 | -1.03685500 | 0.36172000  |
| N | -2.20141500 | -2.70975500 | -0.02886000 |
| H | -0.55461600 | -1.96705900 | 0.40830700  |
| H | -2.75226400 | -3.56506500 | -0.05609000 |
| C | -4.41922000 | -1.77010100 | 0.39853000  |
| H | -4.86266600 | -2.76190100 | 0.32753800  |
| O | -0.55672400 | -2.52629600 | -2.26125700 |
| H | -1.16050500 | -2.59935600 | -1.46419500 |
| H | -1.07948000 | -2.84460300 | -3.00176500 |

#### TS4a<sub>f</sub>-w

|                                              |                             |
|----------------------------------------------|-----------------------------|
| Zero-point correction=                       | 0.536444 (Hartree/Particle) |
| Thermal correction to Energy=                | 0.568148                    |
| Thermal correction to Enthalpy=              | 0.569124                    |
| Thermal correction to Gibbs Free Energy=     | 0.471060                    |
| Sum of electronic and zero-point Energies=   | -1226.663302                |
| Sum of electronic and thermal Energies=      | -1226.631598                |
| Sum of electronic and thermal Enthalpies=    | -1226.630622                |
| Sum of electronic and thermal Free Energies= | -1226.728685                |

|   |            |             |             |
|---|------------|-------------|-------------|
| C | 2.57610800 | -0.04455900 | 0.29656000  |
| C | 4.76964100 | 0.34457700  | 0.81397700  |
| H | 5.82651600 | 0.13265300  | 0.88170700  |
| C | 4.05905500 | 1.43101600  | 1.20635300  |
| H | 4.38197300 | 2.34490400  | 1.68177900  |
| N | 3.85200300 | -0.53333900 | 0.26673100  |
| N | 2.74210300 | 1.17495000  | 0.87922600  |
| C | 1.65573500 | 2.12727800  | 1.09028000  |
| H | 1.48628000 | 2.24731600  | 2.16666900  |
| H | 0.76265400 | 1.68421000  | 0.64758900  |
| C | 4.22414400 | -1.79310500 | -0.35136500 |
| H | 3.28956700 | -2.31693400 | -0.56754600 |
| H | 4.78988700 | -2.39145300 | 0.37369800  |
| C | 1.91545500 | 3.48088100  | 0.43646800  |
| H | 1.03403500 | 4.09824300  | 0.64642400  |
| H | 2.76330000 | 3.98442900  | 0.92160700  |
| C | 2.14251900 | 3.38938400  | -1.06751400 |
| H | 2.25807700 | 4.38572900  | -1.50632000 |
| H | 3.04750100 | 2.81664300  | -1.29897400 |

|   |             |             |             |
|---|-------------|-------------|-------------|
| H | 1.29711100  | 2.89077400  | -1.55124300 |
| C | 5.03222000  | -1.61565000 | -1.63554800 |
| H | 5.96537100  | -1.08542100 | -1.40500200 |
| H | 5.32714000  | -2.61473200 | -1.98118100 |
| C | 4.27344000  | -0.88155300 | -2.73287900 |
| H | 3.96815700  | 0.11711700  | -2.40635500 |
| H | 4.89155400  | -0.77090200 | -3.62902900 |
| H | 3.36411000  | -1.42301500 | -3.01587000 |
| C | 0.30758200  | -2.58901500 | -0.02620800 |
| C | -0.61752000 | -3.61953900 | 0.66443300  |
| C | -0.93389100 | -3.19736700 | 2.09648100  |
| C | -1.54189100 | -1.79882100 | 2.13895200  |
| C | -0.63569000 | -0.75122000 | 1.44024000  |
| C | -0.34725100 | -1.26169700 | 0.08196800  |
| H | -1.62359500 | -3.91742200 | 2.55139900  |
| H | -1.54742900 | -3.71941000 | 0.09030200  |
| H | -0.12181900 | -4.59568500 | 0.63695900  |
| H | 1.25943300  | -2.53236100 | 0.50826300  |
| H | 0.49184000  | -2.83622600 | -1.07393200 |
| H | -2.52641200 | -1.79560800 | 1.65590700  |
| H | -1.69387200 | -1.46261600 | 3.16926600  |
| H | -1.09478500 | 0.24237300  | 1.45298800  |
| H | 0.32716200  | -0.70266700 | 1.96132300  |
| H | -0.01285600 | -3.21905300 | 2.69532900  |
| O | -0.82440000 | -0.78253400 | -0.98764600 |
| C | -5.81893800 | -0.32365500 | -0.84282800 |
| C | -4.93030800 | -1.39438200 | -1.08481800 |
| C | -3.57588700 | -1.13422800 | -1.08992700 |
| C | -3.06493200 | 0.15829800  | -0.84727400 |
| C | -3.95791600 | 1.27013800  | -0.58226900 |
| H | -2.88354200 | -1.93921300 | -1.32191100 |
| H | -6.89131400 | -0.50679500 | -0.84636800 |
| H | -5.30493700 | -2.39285500 | -1.28534000 |
| C | -1.66306700 | 0.45988300  | -0.93338700 |
| N | -0.98695200 | 1.51465300  | -0.99007400 |
| N | -3.46918500 | 2.48173600  | -0.32119000 |
| H | -1.67694300 | 2.28807100  | -0.93966500 |
| H | -4.23115700 | 3.14463300  | -0.19618000 |
| C | -5.35755100 | 0.94798600  | -0.60734200 |
| H | -6.06152800 | 1.75747500  | -0.42425100 |
| O | -1.91710200 | 2.22823900  | 1.97653200  |
| H | -2.45829100 | 2.39879700  | 1.15741400  |
| H | -2.50330900 | 2.42944800  | 2.71048400  |

**8a-w**

|                                              |                             |
|----------------------------------------------|-----------------------------|
| Zero-point correction=                       | 0.536445 (Hartree/Particle) |
| Thermal correction to Energy=                | 0.568149                    |
| Thermal correction to Enthalpy=              | 0.569124                    |
| Thermal correction to Gibbs Free Energy=     | 0.471049                    |
| Sum of electronic and zero-point Energies=   | -1226.663301                |
| Sum of electronic and thermal Energies=      | -1226.631597                |
| Sum of electronic and thermal Enthalpies=    | -1226.630621                |
| Sum of electronic and thermal Free Energies= | -1226.728696                |

|   |             |             |             |
|---|-------------|-------------|-------------|
| C | 2.57618200  | -0.04454300 | 0.29655900  |
| C | 4.76968900  | 0.34448600  | 0.81415000  |
| H | 5.82653500  | 0.13247200  | 0.88205700  |
| C | 4.05916800  | 1.43107600  | 1.20621400  |
| H | 4.38211800  | 2.34502400  | 1.68150100  |
| N | 3.85203400  | -0.53344900 | 0.26696100  |
| N | 2.74223600  | 1.17507400  | 0.87896600  |
| C | 1.65589800  | 2.12747500  | 1.08984300  |
| H | 1.48645400  | 2.24769100  | 2.16621600  |
| H | 0.76278800  | 1.68438800  | 0.64722000  |
| C | 4.22415100  | -1.79329600 | -0.35099500 |
| H | 3.28956800  | -2.31704600 | -0.56733900 |
| H | 4.78969000  | -2.39166200 | 0.37421300  |
| C | 1.91567300  | 3.48096000  | 0.43581200  |
| H | 1.03423000  | 4.09835700  | 0.64556600  |
| H | 2.76346700  | 3.98460800  | 0.92093500  |
| C | 2.14287900  | 3.38917600  | -1.06813000 |
| H | 2.25863500  | 4.38543000  | -1.50709300 |
| H | 3.04779900  | 2.81626100  | -1.29940200 |
| H | 1.29745100  | 2.89060500  | -1.55186400 |
| C | 5.03254000  | -1.61599900 | -1.63500300 |
| H | 5.96564400  | -1.08576800 | -1.40427500 |
| H | 5.32752800  | -2.61512300 | -1.98045500 |
| C | 4.27405300  | -0.88199700 | -2.73259600 |
| H | 3.96891300  | 0.11680100  | -2.40632800 |
| H | 4.89231100  | -0.77166100 | -3.62868400 |
| H | 3.36466100  | -1.42335200 | -3.01559700 |
| C | 0.30743300  | -2.58883700 | -0.02659200 |
| C | -0.61780400 | -3.61950400 | 0.66364500  |
| C | -0.93446100 | -3.19762900 | 2.09571600  |
| C | -1.54242000 | -1.79906700 | 2.13840400  |
| C | -0.63609700 | -0.75133600 | 1.44004500  |
| C | -0.34743200 | -1.26154100 | 0.08170200  |

|   |             |             |             |
|---|-------------|-------------|-------------|
| H | -1.62427700 | -3.91776400 | 2.55033800  |
| H | -1.54759200 | -3.71925900 | 0.08930100  |
| H | -0.12209600 | -4.59564400 | 0.63607800  |
| H | 1.25917500  | -2.53230200 | 0.50808900  |
| H | 0.49192300  | -2.83583900 | -1.07432500 |
| H | -2.52689100 | -1.79569900 | 1.65526000  |
| H | -1.69449400 | -1.46308000 | 3.16877600  |
| H | -1.09520900 | 0.24224500  | 1.45289300  |
| H | 0.32665500  | -0.70284600 | 1.96131800  |
| H | -0.01354900 | -3.21948100 | 2.69474700  |
| O | -0.82435800 | -0.78216800 | -0.98791200 |
| C | -5.81891300 | -0.32376000 | -0.84206600 |
| C | -4.93024200 | -1.39437100 | -1.08441500 |
| C | -3.57584500 | -1.13409500 | -1.08978400 |
| C | -3.06494500 | 0.15844000  | -0.84704700 |
| C | -3.95797500 | 1.27016300  | -0.58169800 |
| H | -2.88348800 | -1.93898900 | -1.32205700 |
| H | -6.89127300 | -0.50699700 | -0.84538800 |
| H | -5.30482600 | -2.39284700 | -1.28500300 |
| C | -1.66312100 | 0.46016000  | -0.93341100 |
| N | -0.98707700 | 1.51496800  | -0.99012300 |
| N | -3.46929800 | 2.48177700  | -0.32059500 |
| H | -1.67711900 | 2.28831900  | -0.93946400 |
| H | -4.23131500 | 3.14459200  | -0.19541400 |
| C | -5.35758500 | 0.94788900  | -0.60650400 |
| H | -6.06159400 | 1.75729000  | -0.42314300 |
| O | -1.91702400 | 2.22838100  | 1.97702200  |
| H | -2.45826900 | 2.39877700  | 1.15790200  |
| H | -2.50271500 | 2.43110800  | 2.71096900  |

3:

Zero-point correction=0.357497 (Hartree/Particle)

Thermal correction to Energy=0.379785

Thermal correction to Enthalpy=0.380761

Thermal correction to Gibbs Free Energy=0.302640

Sum of electronic and zero-point Energies=-840.869050

Sum of electronic and thermal Energies=-840.846762

Sum of electronic and thermal Enthalpies=-840.845786

Sum of electronic and thermal Free Energies=-840.923907

|   |             |             |             |
|---|-------------|-------------|-------------|
| C | -1.64136600 | -0.07195600 | -0.66229700 |
|---|-------------|-------------|-------------|

|   |             |             |             |
|---|-------------|-------------|-------------|
| C | -3.90264700 | -0.39469700 | -0.79361400 |
| H | -4.82334100 | -0.95711500 | -0.84546100 |
| C | -3.68230300 | 0.94322000  | -0.82590800 |
| H | -4.37567700 | 1.76687900  | -0.91113700 |
| N | -2.65519200 | -0.98448100 | -0.69522000 |
| N | -2.31225600 | 1.11093800  | -0.74483000 |
| C | -1.65822300 | 2.41075300  | -0.73846700 |
| H | -1.96814800 | 2.96025000  | -1.63563100 |
| H | -0.58623500 | 2.21824700  | -0.81627700 |
| C | -2.44319400 | -2.41805700 | -0.61207800 |
| H | -1.37001600 | -2.57215700 | -0.75399000 |
| H | -2.96471800 | -2.89905100 | -1.44859300 |
| C | -1.95968800 | 3.22999900  | 0.51354300  |
| H | -1.48004700 | 4.20783400  | 0.38351100  |
| H | -3.03947300 | 3.42224200  | 0.57700400  |
| C | -1.46550500 | 2.57869000  | 1.79830300  |
| H | -1.70367900 | 3.19925000  | 2.66812400  |
| H | -1.92531200 | 1.59643100  | 1.94925400  |
| H | -0.38022200 | 2.43900000  | 1.76739800  |
| C | -2.90060200 | -3.02286300 | 0.71345700  |
| H | -3.97839500 | -2.85319800 | 0.83721300  |
| H | -2.76973600 | -4.11031000 | 0.64241600  |
| C | -2.14700400 | -2.48234100 | 1.92138700  |
| H | -2.27354000 | -1.39954700 | 2.01578800  |
| H | -2.50388500 | -2.94683200 | 2.84594500  |
| H | -1.07238700 | -2.67821100 | 1.83753100  |
| C | 3.70563400  | -2.34641400 | -0.21542200 |
| C | 2.33667100  | -2.10090900 | -0.35821900 |
| C | 1.86941600  | -0.79555300 | -0.32441700 |
| C | 2.77530900  | 0.26197800  | -0.14988600 |
| C | 4.16440100  | 0.02498000  | -0.00938700 |
| H | 0.80461700  | -0.57614700 | -0.42956600 |
| H | 4.07822200  | -3.36707600 | -0.23940100 |
| H | 1.64193800  | -2.92349000 | -0.49474500 |
| C | 2.31270700  | 1.60870400  | -0.09484200 |
| N | 1.99386800  | 2.72700600  | -0.03161200 |
| N | 5.05087300  | 1.06550600  | 0.11055000  |
| H | 4.68715900  | 1.97795900  | 0.34127600  |
| H | 5.96618100  | 0.86291600  | 0.47680600  |
| C | 4.60739300  | -1.30662800 | -0.04475400 |
| H | 5.66964700  | -1.51410600 | 0.05591800  |

**TS1:**

Zero-point correction=0.357507 (Hartree/Particle)  
 Thermal correction to Energy=0.378359  
 Thermal correction to Enthalpy=0.379335  
 Thermal correction to Gibbs Free Energy=0.306969  
 Sum of electronic and zero-point Energies=-840.853679  
 Sum of electronic and thermal Energies=-840.832828  
 Sum of electronic and thermal Enthalpies=-840.831852  
 Sum of electronic and thermal Free Energies=-840.904217

|   |             |             |             |
|---|-------------|-------------|-------------|
| C | 1.00117300  | -0.00106700 | -0.39127700 |
| C | 3.03103800  | 0.79862700  | -0.99373500 |
| H | 3.77014800  | 1.54595500  | -1.24018900 |
| C | 3.11566500  | -0.55552500 | -0.97607500 |
| H | 3.94324100  | -1.21104000 | -1.20205800 |
| N | 1.73789600  | 1.11382000  | -0.62267800 |
| N | 1.87198300  | -1.02039800 | -0.59507800 |
| C | 1.51301600  | -2.42495500 | -0.49087400 |
| H | 1.78209500  | -2.91766700 | -1.43183700 |
| H | 0.42400900  | -2.45923900 | -0.40329400 |
| C | 1.20413200  | 2.46466800  | -0.55532000 |
| H | 0.12254600  | 2.36265700  | -0.43457200 |
| H | 1.38301700  | 2.95296400  | -1.51992200 |
| C | 2.17177800  | -3.12514400 | 0.69438800  |
| H | 1.90640800  | -4.18801300 | 0.63532800  |
| H | 3.26351700  | -3.07695300 | 0.58703000  |
| C | 1.75420800  | -2.55698400 | 2.04435500  |
| H | 2.23985900  | -3.09517900 | 2.86413100  |
| H | 2.02531000  | -1.49967400 | 2.13140600  |
| H | 0.67048300  | -2.63349800 | 2.18562900  |
| C | 1.79701800  | 3.28737500  | 0.58509600  |
| H | 2.88167000  | 3.38277900  | 0.44311600  |
| H | 1.38895600  | 4.30228100  | 0.50172200  |
| C | 1.49922000  | 2.71611200  | 1.96505500  |
| H | 1.91289500  | 1.70824000  | 2.07491700  |
| H | 1.93214000  | 3.34253200  | 2.75099200  |
| H | 0.41982500  | 2.65200200  | 2.14045500  |
| C | -3.93015300 | -0.05254100 | 1.60871000  |
| C | -2.60741400 | -0.04408300 | 2.05881600  |
| C | -1.58172500 | -0.05660900 | 1.12231000  |
| C | -1.84127600 | -0.07565100 | -0.24845000 |
| C | -3.18864500 | -0.07595200 | -0.70853400 |
| H | -0.53869900 | -0.05749000 | 1.42633500  |
| H | -4.74904200 | -0.04559300 | 2.32345600  |
| H | -2.38325500 | -0.03103200 | 3.12087700  |



|   |             |             |             |
|---|-------------|-------------|-------------|
| C | -0.80371100 | -0.12318400 | -1.27171000 |
| N | -0.65096000 | -0.20377500 | -2.45496000 |
| N | -3.46774800 | -0.05056400 | -2.04314500 |
| H | -2.68890100 | -0.20630800 | -2.67762500 |
| H | -4.39529100 | -0.28865700 | -2.34943200 |
| C | -4.21736100 | -0.06661400 | 0.25236700  |
| H | -5.25089800 | -0.06348100 | -0.08616500 |

4:

Zero-point correction=0.358954 (Hartree/Particle)

Thermal correction to Energy=0.379903

Thermal correction to Enthalpy=0.380878

Thermal correction to Gibbs Free Energy=0.308369

Sum of electronic and zero-point Energies=-840.869405

Sum of electronic and thermal Energies=-840.848456

Sum of electronic and thermal Enthalpies=-840.847481

Sum of electronic and thermal Free Energies=-840.919990

|   |            |             |             |
|---|------------|-------------|-------------|
| C | 0.94489200 | 0.01132100  | -0.60155600 |
| C | 3.03148300 | 0.79630100  | -0.45451200 |
| H | 3.81442200 | 1.53707800  | -0.41322600 |
| C | 3.09922300 | -0.55824900 | -0.44732400 |
| H | 3.95254900 | -1.21612500 | -0.39794900 |
| N | 1.69439800 | 1.13450800  | -0.52187700 |
| N | 1.80345100 | -1.02993100 | -0.51025900 |
| C | 1.41667900 | -2.42976300 | -0.62581700 |
| H | 1.80335100 | -2.81045300 | -1.57798900 |
| H | 0.32644100 | -2.44348200 | -0.69239100 |
| C | 1.16758900 | 2.48716300  | -0.65031000 |
| H | 0.08047100 | 2.39109400  | -0.69948500 |
| H | 1.50205500 | 2.89139600  | -1.61257300 |
| C | 1.89981100 | -3.27870900 | 0.54454100  |
| H | 1.59932400 | -4.31204100 | 0.33344100  |
| H | 2.99743000 | -3.28637400 | 0.57330600  |
| C | 1.34248300 | -2.83641000 | 1.89138200  |
| H | 1.68787200 | -3.49606600 | 2.69299500  |
| H | 1.66102800 | -1.81830200 | 2.13905700  |
| H | 0.24745000 | -2.84937000 | 1.89027000  |
| C | 1.57852500 | 3.39772800  | 0.50118200  |
| H | 2.66939100 | 3.52252600  | 0.50866400  |
| H | 1.16583800 | 4.39016400  | 0.28377000  |
| C | 1.09578700 | 2.91717700  | 1.86366500  |
| H | 1.53158300 | 1.94582600  | 2.12047700  |

|   |             |             |             |
|---|-------------|-------------|-------------|
| H | 1.37747900  | 3.62467000  | 2.64924400  |
| H | 0.00648600  | 2.80659400  | 1.88122500  |
| C | -3.81045700 | -0.09153000 | 1.50616600  |
| C | -2.51529500 | -0.05724600 | 2.03106700  |
| C | -1.44115100 | -0.03956000 | 1.14670800  |
| C | -1.61893100 | -0.05040400 | -0.23904600 |
| C | -2.94069700 | -0.07493800 | -0.76749100 |
| H | -0.42395600 | -0.02214200 | 1.53643000  |
| H | -4.66703200 | -0.11017700 | 2.17539200  |
| H | -2.35097400 | -0.04822100 | 3.10432500  |
| C | -0.46899700 | -0.05967700 | -1.17337700 |
| N | -0.41795400 | -0.11250100 | -2.42840000 |
| N | -3.11276200 | -0.05217100 | -2.11415300 |
| H | -2.24207300 | -0.12711500 | -2.66761300 |
| H | -4.02235500 | -0.22316800 | -2.50721100 |
| C | -4.02269800 | -0.10050400 | 0.13517100  |
| H | -5.03618800 | -0.12185100 | -0.26001300 |

## TS2:

Zero-point correction=0.355758 (Hartree/Particle)

Thermal correction to Energy=0.375842

Thermal correction to Enthalpy=0.376818

Thermal correction to Gibbs Free Energy=0.306130

Sum of electronic and zero-point Energies=-840.869462

Sum of electronic and thermal Energies=-840.849378

Sum of electronic and thermal Enthalpies=-840.848402

Sum of electronic and thermal Free Energies=-840.919090

|   |             |             |             |
|---|-------------|-------------|-------------|
| C | 0.98842900  | -0.09134500 | -0.60581500 |
| C | 2.89767600  | 1.03996300  | -0.43392200 |
| H | 3.54748800  | 1.90021700  | -0.42856800 |
| C | 3.17933100  | -0.27861000 | -0.27669100 |
| H | 4.11818600  | -0.78035000 | -0.10211700 |
| N | 1.53448100  | 1.14044600  | -0.62192500 |
| N | 1.98820600  | -0.96301600 | -0.37828700 |
| C | 1.84064400  | -2.41549400 | -0.33119000 |
| H | 2.49190800  | -2.83490500 | -1.10484100 |
| H | 0.81126300  | -2.62573900 | -0.62847100 |
| C | 0.80349900  | 2.36201800  | -0.96324600 |
| H | -0.25843300 | 2.11483000  | -0.89095000 |
| H | 1.01969500  | 2.59748700  | -2.01126400 |
| C | 2.16331300  | -3.00067800 | 1.03892100  |
| H | 2.06536400  | -4.08903400 | 0.94630100  |

|   |             |             |             |
|---|-------------|-------------|-------------|
| H | 3.21661200  | -2.81245000 | 1.28652900  |
| C | 1.26208500  | -2.48734900 | 2.15405500  |
| H | 1.49296400  | -2.98525700 | 3.10040200  |
| H | 1.38923600  | -1.41088300 | 2.30912400  |
| H | 0.20560000  | -2.66326600 | 1.92707100  |
| C | 1.14687600  | 3.53902500  | -0.05956900 |
| H | 2.20442400  | 3.80956000  | -0.17702600 |
| H | 0.58056300  | 4.39618000  | -0.44233100 |
| C | 0.81713200  | 3.31463800  | 1.41065800  |
| H | 1.39306300  | 2.48286300  | 1.83058200  |
| H | 1.04951400  | 4.20685600  | 1.99961400  |
| H | -0.24461400 | 3.08529200  | 1.54592400  |
| C | -3.81554000 | 0.19007100  | 1.37850300  |
| C | -2.54488400 | 0.44184600  | 1.92340500  |
| C | -1.42985100 | 0.22940600  | 1.12352100  |
| C | -1.54501600 | -0.22155500 | -0.19596100 |
| C | -2.84047700 | -0.49781300 | -0.75255300 |
| H | -0.43538300 | 0.41097500  | 1.53148000  |
| H | -4.70121000 | 0.35220000  | 1.98888500  |
| H | -2.43902500 | 0.78758700  | 2.94714500  |
| C | -0.39746100 | -0.45148000 | -1.07745000 |
| N | -0.41139100 | -0.90081600 | -2.27000300 |
| N | -2.87950600 | -0.95398800 | -2.01178700 |
| H | -1.72482200 | -1.03932900 | -2.42303400 |
| H | -3.79204800 | -1.14436100 | -2.40354900 |
| C | -3.96775800 | -0.26547400 | 0.08241100  |
| H | -4.96086200 | -0.45985800 | -0.31736300 |

5:

Zero-point correction=0.360748 (Hartree/Particle)

Thermal correction to Energy=0.381078

Thermal correction to Enthalpy=0.382054

Thermal correction to Gibbs Free Energy=0.310798

Sum of electronic and zero-point Energies=-840.879940

Sum of electronic and thermal Energies=-840.859609

Sum of electronic and thermal Enthalpies=-840.858633

Sum of electronic and thermal Free Energies=-840.929889

|   |            |             |             |
|---|------------|-------------|-------------|
| C | 0.96431400 | -0.00006000 | -0.69447300 |
| C | 3.01270700 | 0.68007400  | -0.19512600 |
| H | 3.80878000 | 1.38127400  | -0.00213300 |
| C | 3.01312400 | -0.67877000 | -0.19490500 |
| H | 3.80962300 | -1.37942100 | -0.00167500 |

|   |             |             |             |
|---|-------------|-------------|-------------|
| N | 1.73119700  | 1.08254400  | -0.50170700 |
| N | 1.73186400  | -1.08212600 | -0.50136000 |
| C | 1.28186900  | -2.46267700 | -0.69825400 |
| H | 1.72326100  | -2.82257300 | -1.63328500 |
| H | 0.20005400  | -2.41083700 | -0.84165800 |
| C | 1.28037000  | 2.46274700  | -0.69917500 |
| H | 0.19855900  | 2.41021500  | -0.84236900 |
| H | 1.72140600  | 2.82245600  | -1.63444700 |
| C | 1.63505700  | -3.37631400 | 0.46778800  |
| H | 1.28481300  | -4.37729500 | 0.18964400  |
| H | 2.72556000  | -3.46119800 | 0.56398100  |
| C | 1.01593900  | -2.95756800 | 1.79492400  |
| H | 1.24867500  | -3.68676700 | 2.57639800  |
| H | 1.39522600  | -1.98565000 | 2.12825700  |
| H | -0.07289600 | -2.87526800 | 1.71867500  |
| C | 1.63322700  | 3.37716200  | 0.46635400  |
| H | 2.72369800  | 3.46267500  | 0.56235600  |
| H | 1.28242500  | 4.37781400  | 0.18772700  |
| C | 1.01450600  | 2.95881300  | 1.79380000  |
| H | 1.39444300  | 1.98734000  | 2.12769200  |
| H | 1.24685100  | 3.68863600  | 2.57480800  |
| H | -0.07428400 | 2.87577500  | 1.71770500  |
| C | -3.62919900 | 0.00005600  | 1.57307400  |
| C | -2.29012100 | 0.00048900  | 2.03970600  |
| C | -1.27699800 | 0.00026800  | 1.10582900  |
| C | -1.52347300 | -0.00036500 | -0.28582300 |
| C | -2.89234100 | -0.00084600 | -0.78545700 |
| H | -0.24407300 | 0.00058700  | 1.45493900  |
| H | -4.44481200 | 0.00022200  | 2.29355800  |
| H | -2.07148200 | 0.00097100  | 3.10291800  |
| C | -0.43448900 | -0.00059700 | -1.22709100 |
| N | -0.43397000 | -0.00120000 | -2.51986500 |
| N | -3.12346400 | -0.00147900 | -2.08358800 |
| H | -1.43208900 | -0.00149900 | -2.80965100 |
| H | -4.12692800 | -0.00175600 | -2.26034900 |
| C | -3.91817200 | -0.00057400 | 0.23436100  |
| H | -4.95411300 | -0.00090300 | -0.10064200 |

6:

Zero-point correction=0.512754 (Hartree/Particle)

Thermal correction to Energy=0.541708

Thermal correction to Enthalpy=0.542684

Thermal correction to Gibbs Free Energy=0.450705

Sum of electronic and zero-point Energies=-1150.381606

Sum of electronic and thermal Energies=-1150.352652

Sum of electronic and thermal Enthalpies=-1150.351676

Sum of electronic and thermal Free Energies=-1150.443655

|   |             |             |             |
|---|-------------|-------------|-------------|
| C | 2.02705500  | 0.39927900  | -0.71797900 |
| C | 3.10295300  | 2.31560800  | -0.44743100 |
| H | 3.22892300  | 3.36105800  | -0.21683100 |
| C | 4.00648200  | 1.38434600  | -0.85090500 |
| H | 5.06678100  | 1.46436500  | -1.03139700 |
| N | 1.88180400  | 1.68593000  | -0.36401100 |
| N | 3.32098100  | 0.20213100  | -1.01474400 |
| C | 3.90418900  | -1.05827800 | -1.47719900 |
| H | 4.33209000  | -0.87332100 | -2.46747300 |
| H | 3.07026600  | -1.74998500 | -1.60938500 |
| C | 0.58757200  | 2.33311900  | -0.09615500 |
| H | -0.11412400 | 1.53985400  | 0.16234300  |
| H | 0.24012900  | 2.78137900  | -1.03144400 |
| C | 4.94977400  | -1.61257800 | -0.51678100 |
| H | 5.33870800  | -2.52887800 | -0.97682200 |
| H | 5.80225000  | -0.92340600 | -0.45238200 |
| C | 4.40985500  | -1.91343100 | 0.87508200  |
| H | 5.18058500  | -2.37786300 | 1.49702400  |
| H | 4.08158400  | -1.00204100 | 1.38520500  |
| H | 3.55149200  | -2.59163800 | 0.83473500  |
| C | 0.64223400  | 3.36820700  | 1.01506500  |
| H | 1.28756700  | 4.20941100  | 0.72791800  |
| H | -0.37352500 | 3.77344100  | 1.07433600  |
| C | 1.05806500  | 2.81295800  | 2.37157100  |
| H | 2.07720200  | 2.40959900  | 2.35596900  |
| H | 1.02746900  | 3.59635800  | 3.13478500  |
| H | 0.38626500  | 2.00786200  | 2.68602200  |
| C | -0.86871000 | -2.38505200 | 2.48330000  |
| C | 0.19312300  | -1.46528700 | 2.65242700  |
| C | 0.74694900  | -0.89616600 | 1.52479900  |
| C | 0.28873600  | -1.18379600 | 0.22067700  |
| C | -0.80767300 | -2.12140700 | 0.02700600  |
| H | 1.57714300  | -0.20131100 | 1.64701000  |
| H | -1.31429600 | -2.85491700 | 3.35791500  |
| H | 0.56877200  | -1.22411100 | 3.64168000  |
| C | 0.92882100  | -0.59588000 | -0.93434100 |
| N | 0.71480600  | -0.79151800 | -2.19317100 |
| N | -1.25220100 | -2.38796900 | -1.19097400 |
| H | -0.06886100 | -1.46917600 | -2.25659600 |

|   |             |             |             |
|---|-------------|-------------|-------------|
| H | -1.99920400 | -3.08006500 | -1.14316700 |
| C | -1.34418000 | -2.70097800 | 1.23602200  |
| H | -2.15545000 | -3.41949600 | 1.12750000  |
| C | -3.22897600 | 0.54775300  | -1.56605300 |
| C | -4.68161200 | 0.16564700  | -1.88335900 |
| C | -5.28985400 | -0.67647500 | -0.76445000 |
| C | -5.22212700 | 0.05796900  | 0.57219800  |
| C | -3.78300900 | 0.45694300  | 0.92534600  |
| C | -3.09886000 | 1.18396300  | -0.20822600 |
| H | -6.33047300 | -0.92757700 | -1.00278300 |
| H | -5.28302300 | 1.07528900  | -2.02219600 |
| H | -4.71141400 | -0.37758200 | -2.83454200 |
| H | -2.62032500 | -0.37293300 | -1.54887400 |
| H | -2.80244100 | 1.22017800  | -2.31565900 |
| H | -5.84556000 | 0.96163100  | 0.52087300  |
| H | -5.63681500 | -0.56050500 | 1.37657000  |
| H | -3.73430300 | 1.08150500  | 1.82193200  |
| H | -3.19106000 | -0.45102400 | 1.11760300  |
| H | -4.74306800 | -1.62684800 | -0.68826700 |
| O | -2.45948200 | 2.20899100  | -0.02187500 |

### TS3:

Zero-point correction=0.514229 (Hartree/Particle)

Thermal correction to Energy=0.541153

Thermal correction to Enthalpy=0.542128

Thermal correction to Gibbs Free Energy=0.457962

Sum of electronic and zero-point Energies=-1150.361171

Sum of electronic and thermal Energies=-1150.334247

Sum of electronic and thermal Enthalpies=-1150.333271

Sum of electronic and thermal Free Energies=-1150.417437

|   |             |             |             |
|---|-------------|-------------|-------------|
| C | -1.73089600 | -0.86355400 | -0.51602500 |
| C | -2.75949700 | -2.68714700 | 0.17939000  |
| H | -2.85578400 | -3.65882700 | 0.63725300  |
| C | -3.69067100 | -1.88483600 | -0.40054300 |
| H | -4.74963300 | -2.02754000 | -0.54248500 |
| N | -1.54934200 | -2.03817900 | 0.09666500  |
| N | -3.03362100 | -0.74950600 | -0.82192200 |
| C | -3.61031000 | 0.35012000  | -1.60232900 |
| H | -3.65051100 | 0.02813200  | -2.64815000 |
| H | -2.90083000 | 1.17876100  | -1.53836400 |
| C | -0.25440300 | -2.58917600 | 0.53039200  |
| H | 0.52964100  | -1.87347600 | 0.23399100  |

|   |             |             |             |
|---|-------------|-------------|-------------|
| H | -0.11469200 | -3.52078400 | -0.02793400 |
| C | -4.98549800 | 0.78098500  | -1.11105400 |
| H | -5.32371300 | 1.56174900  | -1.80226500 |
| H | -5.70340100 | -0.04117900 | -1.22697200 |
| C | -5.00727300 | 1.31070300  | 0.31720800  |
| H | -6.01322800 | 1.64291300  | 0.58955700  |
| H | -4.70735600 | 0.54390800  | 1.03949300  |
| H | -4.32732500 | 2.16070800  | 0.43307700  |
| C | -0.19653100 | -2.82925000 | 2.03309600  |
| H | -0.97252300 | -3.54316400 | 2.34525600  |
| H | 0.76456800  | -3.32297400 | 2.21824200  |
| C | -0.27651200 | -1.54564200 | 2.84883500  |
| H | -1.25029000 | -1.05557800 | 2.73535300  |
| H | -0.13792400 | -1.75319000 | 3.91448300  |
| H | 0.49563400  | -0.84269800 | 2.51988400  |
| C | -0.07450000 | 3.61721700  | 1.35652400  |
| C | -1.13784400 | 2.75481800  | 1.66228900  |
| C | -1.25354800 | 1.56832100  | 0.95693300  |
| C | -0.33586400 | 1.20290300  | -0.04342200 |
| C | 0.79890400  | 2.03645600  | -0.29622900 |
| H | -2.09020700 | 0.90826600  | 1.17741000  |
| H | 0.02417500  | 4.56302900  | 1.88379800  |
| H | -1.85855400 | 3.01308800  | 2.43213300  |
| C | -0.63949000 | 0.07727500  | -0.92851600 |
| N | -0.17144400 | -0.22368900 | -2.08225200 |
| N | 1.76270200  | 1.59816800  | -1.14475900 |
| H | 0.60755300  | 0.42399400  | -2.27602200 |
| H | 2.45943400  | 2.32716000  | -1.27789800 |
| C | 0.86843900  | 3.26414300  | 0.40961800  |
| H | 1.70935200  | 3.92431600  | 0.20700000  |
| C | 3.26834900  | -0.49941500 | -1.62639300 |
| C | 4.36324900  | -1.48382400 | -1.19881600 |
| C | 5.45377200  | -0.79223900 | -0.37844800 |
| C | 4.86895500  | -0.04960300 | 0.82381500  |
| C | 3.79474400  | 0.94655400  | 0.37709500  |
| C | 2.69985700  | 0.17077400  | -0.37237700 |
| H | 6.20077800  | -1.52518500 | -0.04717100 |
| H | 3.90175400  | -2.27435200 | -0.59188900 |
| H | 4.80117900  | -1.97069700 | -2.07986000 |
| H | 3.68812000  | 0.25177200  | -2.30921700 |
| H | 2.46015200  | -1.01953800 | -2.15009300 |
| H | 4.40970000  | -0.76876300 | 1.51447600  |
| H | 5.66367400  | 0.46806800  | 1.37660100  |
| H | 3.34063000  | 1.45322200  | 1.23556500  |

|   |            |             |             |
|---|------------|-------------|-------------|
| H | 4.26436800 | 1.70432100  | -0.26719900 |
| H | 5.98594500 | -0.07323900 | -1.02018800 |
| O | 1.91383000 | -0.51541200 | 0.35647000  |

7:

Zero-point correction=0.515222 (Hartree/Particle)

Thermal correction to Energy=0.542297

Thermal correction to Enthalpy=0.543273

Thermal correction to Gibbs Free Energy=0.459259

Sum of electronic and zero-point Energies=-1150.360888

Sum of electronic and thermal Energies=-1150.333813

Sum of electronic and thermal Enthalpies=-1150.332837

Sum of electronic and thermal Free Energies=-1150.416850

|   |             |             |             |
|---|-------------|-------------|-------------|
| C | -1.60308400 | -0.90003800 | -0.43186100 |
| C | -2.55984200 | -2.71675300 | 0.37346500  |
| H | -2.61862400 | -3.65282500 | 0.90606600  |
| C | -3.50707000 | -2.02506600 | -0.31193200 |
| H | -4.54822000 | -2.24303200 | -0.48538600 |
| N | -1.38486900 | -2.00746000 | 0.28666800  |
| N | -2.89641100 | -0.89357600 | -0.80307300 |
| C | -3.50716800 | 0.09590400  | -1.69768300 |
| H | -3.45742600 | -0.30419500 | -2.71544700 |
| H | -2.86912800 | 0.98145400  | -1.66452500 |
| C | -0.08743800 | -2.48034800 | 0.80304900  |
| H | 0.69010700  | -1.78430700 | 0.43161200  |
| H | 0.06662800  | -3.47035900 | 0.36053300  |
| C | -4.93736900 | 0.44995000  | -1.31509800 |
| H | -5.29255000 | 1.14678700  | -2.08321000 |
| H | -5.58459900 | -0.43215400 | -1.40200300 |
| C | -5.08040000 | 1.08378800  | 0.06304300  |
| H | -6.12216800 | 1.35433800  | 0.25775300  |
| H | -4.76323100 | 0.40175800  | 0.85923500  |
| H | -4.47540500 | 1.99270500  | 0.14277700  |
| C | -0.05219800 | -2.54597100 | 2.32410900  |
| H | -0.83207700 | -3.22066500 | 2.70755800  |
| H | 0.90674500  | -3.01393400 | 2.57605500  |
| C | -0.13946300 | -1.17801900 | 2.98777200  |
| H | -1.11994300 | -0.71389100 | 2.83128200  |
| H | 0.01271600  | -1.26002600 | 4.06874100  |
| H | 0.62039800  | -0.51151100 | 2.56620300  |
| C | -0.17974500 | 3.73398200  | 1.30699300  |
| C | -1.25380600 | 2.88040200  | 1.56963900  |
| C | -1.31184800 | 1.65704600  | 0.91383100  |



|   |             |             |             |
|---|-------------|-------------|-------------|
| C | -0.32248400 | 1.25750600  | 0.00392500  |
| C | 0.81687100  | 2.08582000  | -0.19173600 |
| H | -2.16317900 | 1.00455700  | 1.09665300  |
| H | -0.12213800 | 4.70358100  | 1.79474600  |
| H | -2.03502200 | 3.16876700  | 2.26640400  |
| C | -0.59541000 | 0.11593600  | -0.88557000 |
| N | -0.25148900 | -0.06751600 | -2.10450400 |
| N | 1.84827900  | 1.64172600  | -0.98384000 |
| H | 0.44743400  | 0.64172800  | -2.35421900 |
| H | 2.53352800  | 2.37871800  | -1.11688000 |
| C | 0.83958000  | 3.33559100  | 0.45376100  |
| H | 1.70024300  | 3.98254200  | 0.29815600  |
| C | 3.07869800  | -0.40380100 | -1.73310900 |
| C | 4.01072100  | -1.55663400 | -1.36489000 |
| C | 5.21131600  | -1.07062300 | -0.55376800 |
| C | 4.76544700  | -0.28912200 | 0.68214200  |
| C | 3.84655300  | 0.86783000  | 0.29615900  |
| C | 2.60323100  | 0.32532900  | -0.45714600 |
| H | 5.84403700  | -1.91882700 | -0.26098900 |
| H | 3.44107200  | -2.28059600 | -0.76728400 |
| H | 4.34834300  | -2.07903400 | -2.26967300 |
| H | 3.60129400  | 0.29832000  | -2.40098200 |
| H | 2.20291900  | -0.78258800 | -2.27040100 |
| H | 4.20937400  | -0.95353100 | 1.35564000  |
| H | 5.63796600  | 0.08263900  | 1.23553200  |
| H | 3.49369200  | 1.40330000  | 1.18594000  |
| H | 4.40970500  | 1.57836200  | -0.33201300 |
| H | 5.83463200  | -0.41983200 | -1.18678500 |
| O | 1.82297000  | -0.39084000 | 0.32394700  |

#### TS4:

Zero-point correction=0.514660 (Hartree/Particle)

Thermal correction to Energy=0.540898

Thermal correction to Enthalpy=0.541874

Thermal correction to Gibbs Free Energy=0.459369

Sum of electronic and zero-point Energies=-1150.349849

Sum of electronic and thermal Energies=-1150.323611

Sum of electronic and thermal Enthalpies=-1150.322635

Sum of electronic and thermal Free Energies=-1150.405140

|   |             |             |            |
|---|-------------|-------------|------------|
| C | -1.21512000 | -0.77222500 | 0.45438500 |
| C | -2.45306600 | -1.04667200 | 2.31719300 |
| H | -2.81642000 | -0.82550900 | 3.30902100 |

|   |             |             |             |
|---|-------------|-------------|-------------|
| C | -2.77032200 | -2.04991200 | 1.46352500  |
| H | -3.45826200 | -2.87524000 | 1.56656800  |
| N | -1.50066000 | -0.27587100 | 1.68073500  |
| N | -2.00061900 | -1.86431700 | 0.33166300  |
| C | -2.01299400 | -2.79357500 | -0.80010000 |
| H | -1.84511300 | -3.79688900 | -0.39233500 |
| H | -1.14528100 | -2.52088100 | -1.41706200 |
| C | -0.84527700 | 0.86358400  | 2.31526900  |
| H | -0.09063800 | 1.22975100  | 1.62037700  |
| H | -0.31496100 | 0.48966200  | 3.19888400  |
| C | -3.32230000 | -2.75544100 | -1.58095000 |
| H | -3.26880700 | -3.55246600 | -2.33288900 |
| H | -4.16196100 | -3.01618100 | -0.92157000 |
| C | -3.59746600 | -1.42116200 | -2.26160100 |
| H | -4.54269400 | -1.44803000 | -2.81280400 |
| H | -3.66272900 | -0.60783300 | -1.53080800 |
| H | -2.80038900 | -1.17352700 | -2.97054500 |
| C | -1.81823800 | 1.97032500  | 2.70790700  |
| H | -2.53146200 | 1.59328600  | 3.45334000  |
| H | -1.22964500 | 2.74144500  | 3.22024700  |
| C | -2.56521700 | 2.58211500  | 1.53063400  |
| H | -3.16909400 | 1.83229000  | 1.00857600  |
| H | -3.23924800 | 3.37570100  | 1.86850300  |
| H | -1.87247700 | 3.01084200  | 0.79981200  |
| C | -0.10496600 | 3.86648600  | -1.57079400 |
| C | -1.08290400 | 2.98942100  | -2.04483600 |
| C | -0.97675700 | 1.63495500  | -1.74497400 |
| C | 0.08019300  | 1.13376300  | -0.98647300 |
| C | 1.06246500  | 2.02302100  | -0.50993800 |
| H | -1.73399800 | 0.93945500  | -2.09911800 |
| H | -0.16651900 | 4.92773600  | -1.79643700 |
| H | -1.91574000 | 3.35806200  | -2.63592800 |
| C | 0.24977000  | -0.34458400 | -0.74375300 |
| N | 0.33108700  | -1.17348700 | -1.76643400 |
| N | 2.08425000  | 1.54517300  | 0.29728400  |
| H | -0.05043800 | -0.71969800 | -2.59459800 |
| H | 2.89362300  | 2.14874900  | 0.35180500  |
| C | 0.95431000  | 3.39100700  | -0.80914200 |
| H | 1.71390800  | 4.07745800  | -0.44040200 |
| C | 3.21170500  | -0.21920400 | -1.04542100 |
| C | 3.62027600  | -1.68871100 | -1.08349500 |
| C | 4.40241900  | -2.07993500 | 0.16892700  |
| C | 3.61688000  | -1.74266800 | 1.43500300  |
| C | 3.20311700  | -0.27287800 | 1.46304100  |

|   |            |             |             |
|---|------------|-------------|-------------|
| C | 2.40738000 | 0.12001000  | 0.22009400  |
| H | 4.64388600 | -3.14976900 | 0.15002000  |
| H | 2.70725000 | -2.28853300 | -1.17345700 |
| H | 4.21977800 | -1.87862000 | -1.98226100 |
| H | 4.10882500 | 0.41902500  | -1.03723500 |
| H | 2.62733900 | 0.03772200  | -1.93260400 |
| H | 2.71262400 | -2.36175500 | 1.47740100  |
| H | 4.20752000 | -1.97403500 | 2.32994900  |
| H | 2.59234600 | -0.04667400 | 2.34396800  |
| H | 4.09773600 | 0.36509600  | 1.51024900  |
| H | 5.36323000 | -1.54262500 | 0.18432600  |
| O | 1.18326000 | -0.58935100 | 0.31340900  |

8:

Zero-point correction=0.515228 (Hartree/Particle)

Thermal correction to Energy=0.543006

Thermal correction to Enthalpy=0.543982

Thermal correction to Gibbs Free Energy=0.454437

Sum of electronic and zero-point Energies=-1150.385910

Sum of electronic and thermal Energies=-1150.358132

Sum of electronic and thermal Enthalpies=-1150.357156

Sum of electronic and thermal Free Energies=-1150.446702

|   |            |             |             |
|---|------------|-------------|-------------|
| C | 2.94864300 | -0.40279600 | -0.67159400 |
| C | 5.23287700 | -0.50600500 | -0.63866900 |
| H | 6.24255300 | -0.12410600 | -0.60482700 |
| C | 4.77172600 | -1.77620100 | -0.75122200 |
| H | 5.30376800 | -2.71261300 | -0.83267100 |
| N | 4.11263000 | 0.30412500  | -0.59361600 |
| N | 3.39252800 | -1.68740800 | -0.77089700 |
| C | 2.51908600 | -2.84928900 | -0.86950600 |
| H | 2.87073300 | -3.46698300 | -1.70440800 |
| H | 1.52154300 | -2.48029900 | -1.11903900 |
| C | 4.17304200 | 1.74939800  | -0.46514700 |
| H | 3.16493800 | 2.11697800  | -0.67296400 |
| H | 4.83573500 | 2.14157200  | -1.24605600 |
| C | 2.47279700 | -3.67341900 | 0.41499700  |
| H | 1.86422300 | -4.56235700 | 0.20627900  |
| H | 3.47993400 | -4.03995000 | 0.65650200  |
| C | 1.89032000 | -2.91421300 | 1.60004900  |
| H | 1.84032700 | -3.55245600 | 2.48822600  |
| H | 2.49911600 | -2.03885000 | 1.84922600  |
| H | 0.88013300 | -2.55814000 | 1.37229800  |

|   |             |             |             |
|---|-------------|-------------|-------------|
| C | 4.64621600  | 2.21447100  | 0.91050700  |
| H | 5.66110500  | 1.83617000  | 1.09063300  |
| H | 4.73068700  | 3.30831100  | 0.87800400  |
| C | 3.72525400  | 1.79306400  | 2.04798200  |
| H | 3.63034500  | 0.70393200  | 2.09815200  |
| H | 4.10733400  | 2.14381400  | 3.01175500  |
| H | 2.71778200  | 2.20276100  | 1.91630500  |
| C | -1.09368100 | 4.12115500  | 0.08560600  |
| C | 0.08692400  | 3.37211100  | 0.08581400  |
| C | 0.02657200  | 2.00371700  | -0.14102500 |
| C | -1.19666700 | 1.36511300  | -0.36728200 |
| C | -2.38480800 | 2.12241900  | -0.34189800 |
| H | 0.93819000  | 1.40886100  | -0.15676500 |
| H | -1.05813500 | 5.19358100  | 0.25749200  |
| H | 1.04278000  | 3.85793000  | 0.25763700  |
| C | -1.26941400 | -0.08046500 | -0.67942400 |
| N | -0.31639400 | -0.90274400 | -0.83113900 |
| N | -3.58191200 | 1.47542000  | -0.56901600 |
| H | 0.60347200  | -0.45737200 | -0.74297900 |
| H | -4.41476500 | 1.99222800  | -0.32490100 |
| C | -2.31924000 | 3.50657900  | -0.12258600 |
| H | -3.23665000 | 4.09057600  | -0.11498600 |
| C | -3.58246400 | -0.22335600 | 1.25181900  |
| C | -3.69212600 | -1.71657500 | 1.55487400  |
| C | -4.95376800 | -2.31333800 | 0.93419300  |
| C | -5.00558900 | -2.04549600 | -0.56887900 |
| C | -4.88219500 | -0.55527500 | -0.87885800 |
| C | -3.63143700 | 0.05710500  | -0.25920400 |
| H | -4.99762400 | -3.39183900 | 1.12649200  |
| H | -2.80820400 | -2.22764100 | 1.15380100  |
| H | -3.68667700 | -1.87233100 | 2.64014200  |
| H | -4.42016300 | 0.31512100  | 1.71748700  |
| H | -2.66147700 | 0.19601500  | 1.67296900  |
| H | -4.18378900 | -2.57645500 | -1.06387100 |
| H | -5.93869900 | -2.42998700 | -0.99692100 |
| H | -4.84847700 | -0.37342800 | -1.95796500 |
| H | -5.75404400 | -0.01813400 | -0.47810800 |
| H | -5.83987100 | -1.87298100 | 1.41609500  |
| O | -2.52831200 | -0.57123700 | -0.90295400 |

**TS5:**

Zero-point correction=0.513474 (Hartree/Particle)

Thermal correction to Energy=0.539351

Thermal correction to Enthalpy=0.540326  
 Thermal correction to Gibbs Free Energy=0.457991  
 Sum of electronic and zero-point Energies=-1150.329772  
 Sum of electronic and thermal Energies=-1150.303895  
 Sum of electronic and thermal Enthalpies=-1150.302919  
 Sum of electronic and thermal Free Energies=-1150.385255

|   |             |             |             |
|---|-------------|-------------|-------------|
| C | -1.95250900 | -0.06103900 | -0.06303000 |
| C | -2.25542000 | -1.01930200 | 1.97363600  |
| H | -2.15454700 | -1.13609800 | 3.04196800  |
| C | -2.91078000 | -1.78516100 | 1.06760700  |
| H | -3.48141500 | -2.69253800 | 1.19917800  |
| N | -1.68736800 | 0.03303200  | 1.28025900  |
| N | -2.73756000 | -1.19398500 | -0.16956400 |
| C | -3.15655600 | -1.75572300 | -1.43217500 |
| H | -3.31975700 | -2.82694900 | -1.27408000 |
| H | -2.30847000 | -1.65192100 | -2.12390500 |
| C | -1.01387300 | 1.16641300  | 1.88832000  |
| H | -0.65081100 | 1.79390900  | 1.07061100  |
| H | -0.13558900 | 0.80388300  | 2.43390200  |
| C | -4.41485100 | -1.11891800 | -2.02224500 |
| H | -4.72610300 | -1.73493500 | -2.87627400 |
| H | -5.22255200 | -1.18144000 | -1.28181400 |
| C | -4.22546000 | 0.32466300  | -2.46968900 |
| H | -5.15853000 | 0.74139100  | -2.86224400 |
| H | -3.89254600 | 0.95488900  | -1.63859600 |
| H | -3.47314900 | 0.39203400  | -3.26487500 |
| C | -1.92863700 | 1.97983300  | 2.80158400  |
| H | -2.27401300 | 1.34861400  | 3.63124900  |
| H | -1.31764000 | 2.77057800  | 3.25435600  |
| C | -3.12389000 | 2.58752500  | 2.07956300  |
| H | -3.74316600 | 1.81137100  | 1.61842700  |
| H | -3.75427700 | 3.15531900  | 2.77129600  |
| H | -2.79895200 | 3.26649900  | 1.28375700  |
| C | 2.81223300  | 3.81099300  | -0.90138100 |
| C | 1.56852500  | 3.75320100  | -1.53063100 |
| C | 0.79923500  | 2.59780100  | -1.44859000 |
| C | 1.24473500  | 1.46448800  | -0.73491900 |
| C | 2.50622000  | 1.54986800  | -0.07773800 |
| H | -0.17014000 | 2.57374200  | -1.94144300 |
| H | 3.42299000  | 4.70641300  | -0.96690400 |
| H | 1.19522700  | 4.60929600  | -2.08550000 |
| C | 0.52199200  | 0.23305400  | -0.65185300 |
| N | -0.70790600 | -0.01706100 | -1.11967300 |

|   |             |             |             |
|---|-------------|-------------|-------------|
| N | 2.89825000  | 0.47090900  | 0.71646700  |
| H | -0.98444600 | 0.63210100  | -1.84359900 |
| H | 3.88679400  | 0.45653700  | 0.93151700  |
| C | 3.27204600  | 2.70753100  | -0.17878300 |
| H | 4.23275700  | 2.75228800  | 0.33116200  |
| C | 2.95942200  | -1.36476300 | -0.96594600 |
| C | 2.45512100  | -2.76728400 | -1.29844700 |
| C | 2.73629200  | -3.74001900 | -0.15495900 |
| C | 2.14208600  | -3.22978400 | 1.15654800  |
| C | 2.63531500  | -1.82229900 | 1.48746000  |
| C | 2.37147700  | -0.83972600 | 0.35233000  |
| H | 2.33433800  | -4.73294300 | -0.39035400 |
| H | 1.37459600  | -2.71972900 | -1.48352100 |
| H | 2.92285100  | -3.11901500 | -2.22596800 |
| H | 4.05359000  | -1.37627300 | -0.86022900 |
| H | 2.72271500  | -0.66041700 | -1.77085200 |
| H | 1.04815300  | -3.20962200 | 1.07765100  |
| H | 2.39067000  | -3.90809500 | 1.98161300  |
| H | 2.15544300  | -1.43189400 | 2.39121700  |
| H | 3.71877800  | -1.84193900 | 1.67334100  |
| H | 3.82406100  | -3.86210800 | -0.04044900 |
| O | 0.95861100  | -0.72016600 | 0.25337200  |

9:

Zero-point correction=0.514724 (Hartree/Particle)

Thermal correction to Energy=0.539071

Thermal correction to Enthalpy=0.540047

Thermal correction to Gibbs Free Energy=0.462518

Sum of electronic and zero-point Energies=-1150.360472

Sum of electronic and thermal Energies=-1150.336125

Sum of electronic and thermal Enthalpies=-1150.335149

Sum of electronic and thermal Free Energies=-1150.412678

|   |             |             |             |
|---|-------------|-------------|-------------|
| C | -1.79896800 | -0.36873400 | 0.13848500  |
| C | -3.36918200 | -1.23125600 | 1.46634300  |
| H | -3.84228800 | -1.48532200 | 2.40161400  |
| C | -3.74854300 | -1.47163800 | 0.19504300  |
| H | -4.61233100 | -1.98036100 | -0.20242400 |
| N | -2.16318500 | -0.54770300 | 1.43731400  |
| N | -2.76946200 | -0.94234900 | -0.63584100 |
| C | -2.77527100 | -1.06067600 | -2.08375200 |
| H | -3.12565800 | -2.07143400 | -2.32279600 |
| H | -1.73685700 | -0.99642800 | -2.42828600 |

|   |             |             |             |
|---|-------------|-------------|-------------|
| C | -1.50525400 | -0.02996800 | 2.63607000  |
| H | -0.45963900 | 0.15197600  | 2.35300600  |
| H | -1.56046300 | -0.82238300 | 3.39157300  |
| C | -3.64902900 | -0.02242900 | -2.78481900 |
| H | -3.65336800 | -0.27046100 | -3.85367700 |
| H | -4.68343000 | -0.14062500 | -2.43726800 |
| C | -3.19483500 | 1.41703600  | -2.58390000 |
| H | -3.86191200 | 2.11014100  | -3.10460000 |
| H | -3.19489200 | 1.69662000  | -1.52505900 |
| H | -2.18371000 | 1.57945500  | -2.97434900 |
| C | -2.13966300 | 1.25706800  | 3.15397700  |
| H | -3.18652000 | 1.07379200  | 3.43429100  |
| H | -1.61299700 | 1.51210700  | 4.08241800  |
| C | -2.05130200 | 2.42017200  | 2.17385000  |
| H | -2.63344600 | 2.22135000  | 1.26668700  |
| H | -2.44762900 | 3.33693400  | 2.62132200  |
| H | -1.01549500 | 2.59967600  | 1.86936300  |
| C | 2.96574200  | 3.66430500  | -0.83648300 |
| C | 1.58673800  | 3.76010300  | -1.00512500 |
| C | 0.75293700  | 2.71161000  | -0.61683700 |
| C | 1.27031800  | 1.53582200  | -0.02323100 |
| C | 2.69046200  | 1.43276100  | 0.08085700  |
| H | -0.32510400 | 2.82237500  | -0.71315900 |
| H | 3.62010300  | 4.48154000  | -1.12473900 |
| H | 1.15006700  | 4.66018000  | -1.43094300 |
| C | 0.46613800  | 0.45629300  | 0.43012300  |
| N | -0.70398400 | 0.22554200  | -0.33458800 |
| N | 3.19564800  | 0.22930700  | 0.59217600  |
| H | -0.70745500 | 0.43989400  | -1.33929200 |
| H | 4.18263900  | 0.09958100  | 0.40962300  |
| C | 3.50725200  | 2.48498200  | -0.30776800 |
| H | 4.58722100  | 2.37749300  | -0.21295900 |
| C | 2.32953200  | -1.25869300 | -1.21710300 |
| C | 1.57772400  | -2.55454400 | -1.51335900 |
| C | 2.18537100  | -3.73254500 | -0.75377800 |
| C | 2.24196800  | -3.44498800 | 0.74558700  |
| C | 2.99314900  | -2.14889400 | 1.04057400  |
| C | 2.40569800  | -0.95902200 | 0.28960800  |
| H | 1.61299100  | -4.64893000 | -0.94508200 |
| H | 0.52836000  | -2.43550500 | -1.21167100 |
| H | 1.58279100  | -2.75176800 | -2.59331900 |
| H | 3.35873800  | -1.33742000 | -1.59782400 |
| H | 1.87600700  | -0.40545700 | -1.73344200 |
| H | 1.22117800  | -3.35708500 | 1.13850600  |

|   |            |             |             |
|---|------------|-------------|-------------|
| H | 2.71788500 | -4.27783300 | 1.27758400  |
| H | 2.97398000 | -1.91127300 | 2.10914600  |
| H | 4.04738500 | -2.25793000 | 0.74588200  |
| H | 3.20384000 | -3.91549900 | -1.12830200 |
| O | 1.10262600 | -0.74894600 | 0.82732300  |

**TS6:**

Zero-point correction=0.512099 (Hartree/Particle)

Thermal correction to Energy=0.539389

Thermal correction to Enthalpy=0.540365

Thermal correction to Gibbs Free Energy=0.454232

Sum of electronic and zero-point Energies=-1150.293135

Sum of electronic and thermal Energies=-1150.265845

Sum of electronic and thermal Enthalpies=-1150.264869

Sum of electronic and thermal Free Energies=-1150.351002

|   |             |             |             |
|---|-------------|-------------|-------------|
| C | -1.66247200 | -0.33623700 | -0.30904900 |
| C | -3.34919700 | -1.73081300 | -0.85971500 |
| H | -3.98932200 | -2.59584600 | -0.77071200 |
| C | -3.35285700 | -0.72127400 | -1.76681400 |
| H | -3.99608200 | -0.53868100 | -2.61450600 |
| N | -2.31376700 | -1.48194600 | 0.01614100  |
| N | -2.31508800 | 0.12358300  | -1.41197700 |
| C | -2.03275700 | 1.39388700  | -2.06209300 |
| H | -1.86696200 | 1.21093900  | -3.13042000 |
| H | -1.09813600 | 1.76841800  | -1.63396300 |
| C | -1.94424900 | -2.34474300 | 1.13053300  |
| H | -0.94141400 | -2.03363400 | 1.44119000  |
| H | -1.89367500 | -3.37250800 | 0.75292300  |
| C | -3.13720000 | 2.42910900  | -1.86043700 |
| H | -2.85907100 | 3.31678700  | -2.44207200 |
| H | -4.07167800 | 2.05604200  | -2.29946700 |
| C | -3.35475400 | 2.80500800  | -0.40102000 |
| H | -4.13727400 | 3.56404400  | -0.30689300 |
| H | -3.65659900 | 1.93662700  | 0.19284900  |
| H | -2.43789600 | 3.20556400  | 0.04460500  |
| C | -2.92011100 | -2.24979100 | 2.30070500  |
| H | -3.92431000 | -2.55615800 | 1.97604000  |
| H | -2.59935400 | -2.98926700 | 3.04502700  |
| C | -2.96992500 | -0.86528200 | 2.93432100  |
| H | -3.32240600 | -0.11388600 | 2.21993400  |
| H | -3.64694800 | -0.85248300 | 3.79446400  |
| H | -1.97461600 | -0.55726900 | 3.26985400  |



|   |            |             |             |
|---|------------|-------------|-------------|
| C | 2.23178300 | 4.03871500  | 0.73782700  |
| C | 1.33256500 | 3.65926300  | 1.73568300  |
| C | 0.86514100 | 2.34577100  | 1.76654900  |
| C | 1.27322600 | 1.42716500  | 0.80446500  |
| C | 2.19231500 | 1.80938500  | -0.18787600 |
| H | 0.17975900 | 2.01124600  | 2.54049100  |
| H | 2.61276100 | 5.05637300  | 0.71053200  |
| H | 1.01251700 | 4.37435200  | 2.48742800  |
| C | 0.75682200 | 0.01892900  | 0.80063200  |
| N | 0.18247000 | -0.47412300 | -0.38550300 |
| N | 2.55269800 | 0.83663200  | -1.10570900 |
| H | 0.30680100 | 0.22770500  | -1.11678200 |
| H | 3.37800100 | 1.04253700  | -1.66287700 |
| C | 2.67029900 | 3.12498500  | -0.21674000 |
| H | 3.39195000 | 3.42379800  | -0.97369700 |
| C | 2.27868400 | -1.44796300 | -1.91103900 |
| C | 2.00076800 | -2.90025800 | -1.52788100 |
| C | 3.00917100 | -3.40548800 | -0.49941200 |
| C | 3.03595400 | -2.49785700 | 0.72727300  |
| C | 3.32592400 | -1.04768800 | 0.34027700  |
| C | 2.36804600 | -0.53444900 | -0.71517600 |
| H | 2.76821200 | -4.43502200 | -0.20650700 |
| H | 0.98936500 | -2.95580500 | -1.10755800 |
| H | 2.01797300 | -3.52977300 | -2.42625400 |
| H | 3.24932400 | -1.40562600 | -2.44759700 |
| H | 1.52516100 | -1.07933700 | -2.61741700 |
| H | 2.06840500 | -2.53290900 | 1.24220100  |
| H | 3.79089600 | -2.84280700 | 1.44411600  |
| H | 3.31278100 | -0.40471200 | 1.22773400  |
| H | 4.34996400 | -0.98232300 | -0.07984200 |
| H | 4.01074100 | -3.43589100 | -0.95542800 |
| O | 0.62548500 | -0.60397100 | 1.85573300  |

### 3-W:

Zero-point correction=0.381237 (Hartree/Particle)

Thermal correction to Energy=0.406581

Thermal correction to Enthalpy=0.407557

Thermal correction to Gibbs Free Energy=0.321429

Sum of electronic and zero-point Energies=-917.235285

Sum of electronic and thermal Energies=-917.209941

Sum of electronic and thermal Enthalpies=-917.208965

Sum of electronic and thermal Free Energies=-917.295093

|   |             |             |             |
|---|-------------|-------------|-------------|
| C | -1.68811300 | -0.25874300 | -0.62936800 |
| C | -3.95466800 | -0.48171700 | -0.84444300 |
| H | -4.89388500 | -1.00201800 | -0.96224300 |
| C | -3.68235100 | 0.84511500  | -0.77097100 |
| H | -4.34064200 | 1.70022200  | -0.81252200 |
| N | -2.73393100 | -1.12644100 | -0.75739900 |
| N | -2.31066700 | 0.95236000  | -0.64141400 |
| C | -1.61000800 | 2.22377900  | -0.51600100 |
| H | -1.86077300 | 2.85029400  | -1.37937300 |
| H | -0.54486700 | 1.99194000  | -0.57575400 |
| C | -2.58115800 | -2.56950400 | -0.77035000 |
| H | -1.51440900 | -2.75961100 | -0.91772800 |
| H | -3.11588000 | -2.97088000 | -1.63982800 |
| C | -1.92325600 | 2.96436900  | 0.77988800  |
| H | -1.38940500 | 3.92000300  | 0.73114800  |
| H | -2.99565500 | 3.20046600  | 0.81803800  |
| C | -1.51534500 | 2.19580900  | 2.03010100  |
| H | -1.75692200 | 2.76362700  | 2.93431400  |
| H | -2.02521300 | 1.22849300  | 2.09230000  |
| H | -0.43709000 | 2.00248400  | 2.03402400  |
| C | -3.07417300 | -3.24213700 | 0.50914500  |
| H | -4.14263700 | -3.02689700 | 0.64209900  |
| H | -2.99754200 | -4.32741200 | 0.36363500  |
| C | -2.30121100 | -2.82436800 | 1.75302200  |
| H | -2.36303700 | -1.74381100 | 1.91379500  |
| H | -2.69341800 | -3.32337300 | 2.64471600  |
| H | -1.23934700 | -3.07902600 | 1.66332500  |
| C | 3.41419000  | -2.87691800 | -0.12317700 |
| C | 2.07702000  | -2.49296100 | -0.26527900 |
| C | 1.74995300  | -1.14610400 | -0.27317400 |
| C | 2.76699100  | -0.18660000 | -0.13924200 |
| C | 4.12485600  | -0.56304900 | 0.00410800  |
| H | 0.71211500  | -0.81955300 | -0.38116400 |
| H | 3.67631300  | -3.93159000 | -0.11544800 |
| H | 1.29783100  | -3.24117200 | -0.36868700 |
| C | 2.44713100  | 1.19958400  | -0.13653700 |
| N | 2.24386100  | 2.34503800  | -0.12093900 |
| N | 5.11869100  | 0.37872000  | 0.08799000  |
| H | 4.86246600  | 1.32987400  | 0.30514100  |
| H | 6.01321600  | 0.08550400  | 0.44445400  |
| C | 4.42298500  | -1.93479000 | 0.00895000  |
| H | 5.45770000  | -2.25133100 | 0.11157600  |
| O | 0.69707900  | 4.85788200  | -0.27477500 |
| H | 1.28042100  | 4.08472600  | -0.21422600 |

|   |            |            |             |
|---|------------|------------|-------------|
| H | 1.17129200 | 5.49765800 | -0.81107900 |
|---|------------|------------|-------------|

**TS1-W:**

Zero-point correction=0.382537 (Hartree/Particle)

Thermal correction to Energy=0.406570

Thermal correction to Enthalpy=0.407546

Thermal correction to Gibbs Free Energy=0.326878

Sum of electronic and zero-point Energies=-917.219044

Sum of electronic and thermal Energies=-917.195011

Sum of electronic and thermal Enthalpies=-917.194035

Sum of electronic and thermal Free Energies=-917.274703

|   |             |             |             |
|---|-------------|-------------|-------------|
| C | -0.98578800 | 0.74248200  | -0.56501500 |
| C | -3.18982900 | 1.22775600  | -0.43712300 |
| H | -4.24389600 | 1.12316200  | -0.64219900 |
| C | -2.52959100 | 2.13681600  | 0.32283700  |
| H | -2.90037400 | 2.96325900  | 0.90999400  |
| N | -2.23008300 | 0.38428400  | -0.96191300 |
| N | -1.18649400 | 1.82158800  | 0.22995200  |
| C | -0.12636200 | 2.56239400  | 0.90412500  |
| H | -0.17689500 | 3.60596000  | 0.57120700  |
| H | 0.81862400  | 2.14510500  | 0.54865600  |
| C | -2.49404100 | -0.73005300 | -1.86676900 |
| H | -1.58072200 | -1.32866100 | -1.87662500 |
| H | -2.65212500 | -0.33089300 | -2.87625700 |
| C | -0.21096100 | 2.48448800  | 2.42571500  |
| H | 0.56358900  | 3.15200000  | 2.82390000  |
| H | -1.17003800 | 2.90170400  | 2.76077800  |
| C | -0.02655200 | 1.07812000  | 2.98087700  |
| H | -0.09817400 | 1.07972600  | 4.07282700  |
| H | -0.78235900 | 0.38742500  | 2.59502500  |
| H | 0.95193900  | 0.66876200  | 2.70884700  |
| C | -3.68360000 | -1.58713700 | -1.44872200 |
| H | -4.61056800 | -1.00182000 | -1.51510400 |
| H | -3.78063500 | -2.37388400 | -2.20719400 |
| C | -3.54838000 | -2.21101500 | -0.06537800 |
| H | -3.50480800 | -1.44712000 | 0.71703900  |
| H | -4.40029100 | -2.86404300 | 0.14863200  |
| H | -2.62816700 | -2.79617700 | 0.01519300  |
| C | 4.17022400  | 0.73336000  | -1.55953300 |
| C | 2.99626900  | 1.22744100  | -2.13615700 |
| C | 1.77773200  | 0.76048600  | -1.66597600 |
| C | 1.69366400  | -0.19335600 | -0.64744300 |

|   |             |             |             |
|---|-------------|-------------|-------------|
| C | 2.88747700  | -0.71416200 | -0.07319000 |
| H | 0.84206900  | 1.12881900  | -2.07671000 |
| H | 5.13844200  | 1.08841900  | -1.90289900 |
| H | 3.03459700  | 1.96226200  | -2.93393800 |
| C | 0.41897800  | -0.71497800 | -0.16805300 |
| N | -0.08912300 | -1.62748500 | 0.40639900  |
| N | 2.87144600  | -1.62520700 | 0.93917200  |
| H | 2.04226700  | -2.17077100 | 1.14158900  |
| H | 3.74365700  | -2.05156800 | 1.20256900  |
| C | 4.11688200  | -0.21252400 | -0.55016900 |
| H | 5.03714200  | -0.58812900 | -0.10858200 |
| O | 0.78184100  | -3.72762400 | 1.99059200  |
| H | 0.26139300  | -3.07945100 | 1.47049600  |
| H | 0.68364600  | -4.56606500 | 1.53258800  |

#### 4-W:

Zero-point correction=0.383599 (Hartree/Particle)

Thermal correction to Energy=0.405754

Thermal correction to Enthalpy=0.406729

Thermal correction to Gibbs Free Energy=0.332192

Sum of electronic and zero-point Energies=-917.241768

Sum of electronic and thermal Energies=-917.219614

Sum of electronic and thermal Enthalpies=-917.218638

Sum of electronic and thermal Free Energies=-917.293176

|   |             |             |             |
|---|-------------|-------------|-------------|
| C | 0.55593900  | 0.00409000  | -0.51115200 |
| C | 2.29976100  | 0.71794500  | -1.69022200 |
| H | 2.97469400  | 1.43057900  | -2.13588100 |
| C | 2.33743600  | -0.63794900 | -1.67484600 |
| H | 3.05130400  | -1.32125900 | -2.10525100 |
| N | 1.18803400  | 1.10040200  | -0.97017900 |
| N | 1.24889800  | -1.06558900 | -0.94505300 |
| C | 0.82180300  | -2.45649900 | -0.77837900 |
| H | 0.39148300  | -2.78500000 | -1.73166700 |
| H | 0.02136300  | -2.44371200 | -0.03447300 |
| C | 0.68941700  | 2.47004800  | -0.83118300 |
| H | -0.14057700 | 2.42373000  | -0.12173200 |
| H | 0.28366500  | 2.77203000  | -1.80378700 |
| C | 1.94000000  | -3.39495000 | -0.34277500 |
| H | 1.53819500  | -4.41218400 | -0.43048500 |
| H | 2.76804100  | -3.34566400 | -1.06223100 |
| C | 2.44461000  | -3.14560900 | 1.07227700  |
| H | 3.26472500  | -3.82989100 | 1.31239200  |

|   |             |             |             |
|---|-------------|-------------|-------------|
| H | 2.79334000  | -2.11691900 | 1.21480300  |
| H | 1.64392800  | -3.31336400 | 1.80089700  |
| C | 1.74417000  | 3.46224400  | -0.35770200 |
| H | 2.59836200  | 3.45314600  | -1.04777300 |
| H | 1.29607700  | 4.45858300  | -0.46033300 |
| C | 2.21155700  | 3.23659300  | 1.07387900  |
| H | 2.61750000  | 2.23034000  | 1.22511500  |
| H | 2.98076800  | 3.96712500  | 1.34435200  |
| H | 1.37741800  | 3.35314600  | 1.77439000  |
| C | -4.59056900 | -0.09450500 | -0.83548600 |
| C | -3.54822100 | -0.08401800 | -1.76774100 |
| C | -2.24001700 | -0.05322400 | -1.29901400 |
| C | -1.93590200 | -0.03010000 | 0.06679800  |
| C | -3.00360300 | -0.03464000 | 1.01017600  |
| H | -1.41898300 | -0.04996700 | -2.01601400 |
| H | -5.62267100 | -0.12076900 | -1.17577500 |
| H | -3.75538400 | -0.10131700 | -2.83319500 |
| C | -0.53523200 | -0.01382400 | 0.54948200  |
| N | -0.09394200 | -0.01376700 | 1.73403300  |
| N | -2.71752300 | 0.00715400  | 2.33417200  |
| H | -1.71055200 | -0.02140000 | 2.56953800  |
| H | -3.45158700 | -0.08184000 | 3.01508600  |
| C | -4.32731400 | -0.07058100 | 0.52500000  |
| H | -5.14731400 | -0.07598000 | 1.23994300  |
| O | 2.58896500  | 0.04928300  | 2.02536700  |
| H | 1.57751400  | 0.02181000  | 1.97031900  |
| H | 2.79570800  | 0.06701200  | 2.96333300  |

## TS2-W:

Zero-point correction=0.380724 (Hartree/Particle)

Thermal correction to Energy=0.403726

Thermal correction to Enthalpy=0.404702

Thermal correction to Gibbs Free Energy=0.327660

Sum of electronic and zero-point Energies=-917.239746

Sum of electronic and thermal Energies=-917.216744

Sum of electronic and thermal Enthalpies=-917.215769

Sum of electronic and thermal Free Energies=-917.292811

|   |            |             |             |
|---|------------|-------------|-------------|
| C | 0.53175400 | -0.09211500 | -0.43601400 |
| C | 2.41588000 | 0.04537900  | -1.59263200 |
| H | 3.30279100 | 0.50063300  | -2.00031900 |
| C | 1.95597400 | -1.22803300 | -1.69861700 |
| H | 2.36676300 | -2.08249800 | -2.21231200 |

|   |             |             |             |
|---|-------------|-------------|-------------|
| N | 1.52326400  | 0.73480100  | -0.80526300 |
| N | 0.78469200  | -1.29440700 | -0.97760700 |
| C | -0.04675900 | -2.49003900 | -0.82603100 |
| H | -0.37589700 | -2.78797600 | -1.82726500 |
| H | -0.93219500 | -2.18514200 | -0.26316000 |
| C | 1.57184000  | 2.15857400  | -0.44080200 |
| H | 1.20783700  | 2.21883600  | 0.58802800  |
| H | 0.86111900  | 2.68539500  | -1.08662300 |
| C | 0.68187300  | -3.63079500 | -0.12460900 |
| H | 0.01555000  | -4.50102300 | -0.17259900 |
| H | 1.57579200  | -3.90518600 | -0.70049400 |
| C | 1.05411400  | -3.32527500 | 1.32027800  |
| H | 1.56483800  | -4.18180900 | 1.77140600  |
| H | 1.71301900  | -2.45397800 | 1.40356500  |
| H | 0.16038500  | -3.11371300 | 1.91686300  |
| C | 2.95658900  | 2.77613700  | -0.55986000 |
| H | 3.32223700  | 2.69013700  | -1.59208300 |
| H | 2.81515800  | 3.85139600  | -0.39781100 |
| C | 3.98229200  | 2.24186200  | 0.43334400  |
| H | 3.65494300  | 2.41956600  | 1.46125900  |
| H | 4.12490400  | 1.16129200  | 0.34776800  |
| H | 4.94839900  | 2.73490300  | 0.28637600  |
| C | -4.55208200 | 0.74320400  | -0.87220900 |
| C | -3.53517800 | 0.48696000  | -1.80991700 |
| C | -2.23814200 | 0.32291100  | -1.35006300 |
| C | -1.92298200 | 0.40256200  | 0.01449700  |
| C | -2.95672500 | 0.67659100  | 0.97603300  |
| H | -1.43901100 | 0.13367000  | -2.06750900 |
| H | -5.57577300 | 0.87335800  | -1.21588100 |
| H | -3.76200000 | 0.42359800  | -2.86948800 |
| C | -0.56724600 | 0.24002900  | 0.53595600  |
| N | -0.21137000 | 0.34413300  | 1.76131200  |
| N | -2.59504300 | 0.76152700  | 2.26204900  |
| H | -1.36973900 | 0.59282600  | 2.32311700  |
| H | -3.32911800 | 0.96670100  | 2.92686000  |
| C | -4.28004400 | 0.83755300  | 0.47764900  |
| H | -5.08024900 | 1.04184700  | 1.18587500  |
| O | 2.41933900  | -0.19586700 | 2.13368000  |
| H | 1.43687900  | 0.01816200  | 2.09939700  |
| H | 2.62090200  | -0.34946300 | 3.06013200  |

**TS2-W1:**

Zero-point correction=0.381154 (Hartree/Particle)

Thermal correction to Energy=0.403284  
 Thermal correction to Enthalpy=0.404260  
 Thermal correction to Gibbs Free Energy=0.328710  
 Sum of electronic and zero-point Energies=-917.237194  
 Sum of electronic and thermal Energies=-917.215064  
 Sum of electronic and thermal Enthalpies=-917.214088  
 Sum of electronic and thermal Free Energies=-917.289638

|   |             |             |             |
|---|-------------|-------------|-------------|
| C | 0.87803100  | 0.41601300  | -0.37401700 |
| C | 2.00292400  | 2.32871600  | -0.24868600 |
| H | 2.18235600  | 3.35880900  | 0.01681600  |
| C | 2.78601100  | 1.42850100  | -0.89562100 |
| H | 3.77497900  | 1.52828600  | -1.31362700 |
| N | 0.82381800  | 1.68895700  | 0.06310600  |
| N | 2.07818800  | 0.24953300  | -0.96056800 |
| C | 2.56868100  | -0.98590900 | -1.57780400 |
| H | 2.65078000  | -0.80962600 | -2.65604000 |
| H | 1.80276300  | -1.74008700 | -1.39477800 |
| C | -0.26237600 | 2.30110800  | 0.83451000  |
| H | -1.15560600 | 1.69602600  | 0.66684500  |
| H | -0.44082100 | 3.28845100  | 0.39713400  |
| C | 3.90306200  | -1.44123500 | -0.99603200 |
| H | 4.15898200  | -2.37157700 | -1.51736200 |
| H | 4.69396000  | -0.72596400 | -1.26029700 |
| C | 3.87399300  | -1.67455200 | 0.50938500  |
| H | 4.81849500  | -2.11194400 | 0.84662300  |
| H | 3.72852600  | -0.73721000 | 1.05674900  |
| H | 3.05077400  | -2.33665800 | 0.79088300  |
| C | 0.05768600  | 2.40447900  | 2.32239000  |
| H | 0.96034500  | 3.01463000  | 2.46230400  |
| H | -0.76580200 | 2.96933800  | 2.77658300  |
| C | 0.20931100  | 1.05547900  | 3.01416600  |
| H | 1.04345900  | 0.47627800  | 2.60549400  |
| H | 0.39352100  | 1.19279700  | 4.08388000  |
| H | -0.69122100 | 0.44352500  | 2.89741300  |
| C | -3.96312800 | 0.58275500  | -1.59421500 |
| C | -2.79562100 | 0.82362600  | -2.32949500 |
| C | -1.59409100 | 0.36749600  | -1.81109800 |
| C | -1.50453500 | -0.34742600 | -0.60353500 |
| C | -2.70052400 | -0.63966300 | 0.12336600  |
| H | -0.67583800 | 0.56938900  | -2.36217300 |
| H | -4.92206600 | 0.94119000  | -1.96038100 |
| H | -2.82776700 | 1.35680600  | -3.27430400 |
| C | -0.13795800 | -0.66613200 | -0.10548600 |

|   |             |             |             |
|---|-------------|-------------|-------------|
| N | 0.35454700  | -1.63659500 | 0.54156500  |
| N | -2.68864200 | -1.31789000 | 1.29959100  |
| H | -2.08676600 | -2.24011300 | 1.36943000  |
| H | -3.61332800 | -1.43573800 | 1.69314700  |
| C | -3.91197500 | -0.12151700 | -0.40683200 |
| H | -4.82969200 | -0.31283700 | 0.14569800  |
| O | -1.22569600 | -3.41410800 | 1.32846300  |
| H | -0.35224900 | -2.50800400 | 0.83682100  |
| H | -1.52454500 | -4.07137700 | 0.69360600  |

**5-W:**

Zero-point correction=0.385469 (Hartree/Particle)

Thermal correction to Energy=0.407939

Thermal correction to Enthalpy=0.408915

Thermal correction to Gibbs Free Energy=0.333559

Sum of electronic and zero-point Energies=-917.247782

Sum of electronic and thermal Energies=-917.225311

Sum of electronic and thermal Enthalpies=-917.224335

Sum of electronic and thermal Free Energies=-917.299691

|   |             |             |             |
|---|-------------|-------------|-------------|
| C | -0.51804500 | 0.08999400  | -0.38153300 |
| C | -2.33223300 | -0.08643200 | -1.63283800 |
| H | -3.19563700 | -0.55531500 | -2.07413500 |
| C | -1.85942600 | 1.18106300  | -1.76063800 |
| H | -2.23383900 | 2.01656800  | -2.33028100 |
| N | -1.49050900 | -0.74751900 | -0.77005100 |
| N | -0.73206600 | 1.27187400  | -0.97739400 |
| C | 0.09805200  | 2.46978700  | -0.82485500 |
| H | 0.46549600  | 2.73749800  | -1.82092100 |
| H | 0.96109200  | 2.17442500  | -0.22315200 |
| C | -1.55848000 | -2.16156000 | -0.36653300 |
| H | -1.24795600 | -2.19260300 | 0.68071600  |
| H | -0.81435300 | -2.70313500 | -0.96012400 |
| C | -0.65318700 | 3.62979100  | -0.18201000 |
| H | 0.02057900  | 4.49446600  | -0.22226200 |
| H | -1.52064300 | 3.89578900  | -0.80073500 |
| C | -1.08653800 | 3.36121700  | 1.25309000  |
| H | -1.60495900 | 4.23311500  | 1.66392700  |
| H | -1.75960600 | 2.50026800  | 1.32824800  |
| H | -0.22027500 | 3.15336900  | 1.89000300  |
| C | -2.93553700 | -2.78262600 | -0.54025700 |
| H | -3.24354300 | -2.73413600 | -1.59347200 |



|   |             |             |             |
|---|-------------|-------------|-------------|
| H | -2.80382100 | -3.85107900 | -0.33218400 |
| C | -4.01387100 | -2.21479800 | 0.37555000  |
| H | -3.73671400 | -2.34019400 | 1.42566800  |
| H | -4.16471700 | -1.14161400 | 0.23051900  |
| H | -4.96670200 | -2.72521900 | 0.20424700  |
| C | 4.49479600  | -0.75171600 | -0.93181000 |
| C | 3.41933900  | -0.51766200 | -1.82809500 |
| C | 2.15759400  | -0.35377900 | -1.30649700 |
| C | 1.89596800  | -0.40930000 | 0.08529400  |
| C | 2.98461700  | -0.67309500 | 1.01923800  |
| H | 1.32770300  | -0.18512100 | -1.99316800 |
| H | 5.50030600  | -0.87907800 | -1.32746600 |
| H | 3.59016400  | -0.47450300 | -2.89896700 |
| C | 0.56638300  | -0.23168700 | 0.59494600  |
| N | 0.14156400  | -0.31225200 | 1.81930900  |
| N | 2.74387700  | -0.75930900 | 2.31253400  |
| H | 0.96657300  | -0.53104400 | 2.41453300  |
| H | 3.60771400  | -0.94264600 | 2.82025300  |
| C | 4.29171700  | -0.82486600 | 0.41888900  |
| H | 5.12914600  | -1.01165400 | 1.08881900  |
| O | -2.51308400 | 0.25388300  | 2.12597800  |
| H | -1.53872500 | 0.04324400  | 2.15150800  |
| H | -2.75956100 | 0.47199100  | 3.02818100  |

#### 6-W:

Zero-point correction=0.536825 (Hartree/Particle)

Thermal correction to Energy=0.569203

Thermal correction to Enthalpy=0.570179

Thermal correction to Gibbs Free Energy=0.470094

Sum of electronic and zero-point Energies=-1226.751441

Sum of electronic and thermal Energies=-1226.719064

Sum of electronic and thermal Enthalpies=-1226.718088

Sum of electronic and thermal Free Energies=-1226.818172

|   |             |             |            |
|---|-------------|-------------|------------|
| C | -1.83658900 | -0.01550400 | 0.41841600 |
| C | -3.84344000 | -0.30047300 | 1.29953800 |
| H | -4.89102700 | -0.11794100 | 1.47110900 |
| C | -3.01894000 | -1.24800800 | 1.81870900 |
| H | -3.21473600 | -2.04153300 | 2.52192800 |
| N | -3.09371100 | 0.45379000  | 0.42891000 |
| N | -1.77696300 | -1.05472100 | 1.26071300 |
| C | -0.58257600 | -1.85467300 | 1.55780500 |
| H | -0.36095600 | -1.72505300 | 2.62192600 |

|   |             |             |             |
|---|-------------|-------------|-------------|
| H | 0.24537800  | -1.42362700 | 0.99415200  |
| C | -3.53214700 | 1.63273700  | -0.33453200 |
| H | -3.00869000 | 1.58663900  | -1.29267800 |
| H | -3.17955800 | 2.51830800  | 0.20493500  |
| C | -0.75341300 | -3.32588100 | 1.20442100  |
| H | 0.16806300  | -3.81865000 | 1.53281500  |
| H | -1.57052100 | -3.76082200 | 1.79613500  |
| C | -0.97559300 | -3.57168800 | -0.28163400 |
| H | -1.08913300 | -4.64217800 | -0.47923600 |
| H | -1.86794500 | -3.06028700 | -0.65872200 |
| H | -0.11678600 | -3.21145000 | -0.85673100 |
| C | -5.03646000 | 1.69970500  | -0.54820400 |
| H | -5.55484200 | 1.73714200  | 0.41936000  |
| H | -5.22441200 | 2.67666600  | -1.00921500 |
| C | -5.60605800 | 0.59881200  | -1.43549800 |
| H | -5.13816900 | 0.61312500  | -2.42346800 |
| H | -5.42356500 | -0.40075300 | -1.03182300 |
| H | -6.68550700 | 0.73010600  | -1.55925200 |
| C | 1.93344000  | 3.30048800  | 1.36497100  |
| C | 0.94953900  | 2.65827000  | 2.15636800  |
| C | 0.11044500  | 1.75182500  | 1.54778600  |
| C | 0.20850500  | 1.42638700  | 0.17398200  |
| C | 1.23256700  | 2.05596900  | -0.64877000 |
| H | -0.66109200 | 1.27168400  | 2.14921600  |
| H | 2.59518700  | 4.03184200  | 1.82442300  |
| H | 0.85289000  | 2.88487500  | 3.21311300  |
| C | -0.73365700 | 0.52497500  | -0.43731600 |
| N | -0.81251000 | 0.14801700  | -1.67417600 |
| N | 1.35777200  | 1.73008400  | -1.92455700 |
| H | -0.03346000 | 0.60549600  | -2.18756900 |
| H | 2.09302600  | 2.28671700  | -2.35816300 |
| C | 2.06618700  | 3.02040800  | 0.03006900  |
| H | 2.82510700  | 3.52909600  | -0.56226200 |
| O | -3.02267600 | -1.36797100 | -2.28597800 |
| H | -2.17564900 | -0.85827000 | -2.18542600 |
| H | -2.90119900 | -1.93046600 | -3.05475900 |
| C | 3.16296300  | -1.25634700 | -1.29048300 |
| C | 4.56739200  | -0.93299800 | -1.81419300 |
| C | 5.19648700  | 0.22407100  | -1.04286800 |
| C | 5.26687500  | -0.09436100 | 0.44812000  |
| C | 3.87852700  | -0.40145700 | 1.02085700  |
| C | 3.11418700  | -1.41859500 | 0.20625000  |
| H | 6.19976100  | 0.43669500  | -1.43113700 |
| H | 5.20970700  | -1.82037900 | -1.72322300 |

|   |            |             |             |
|---|------------|-------------|-------------|
| H | 4.50767000 | -0.69830800 | -2.88291600 |
| H | 2.49292900 | -0.41309600 | -1.53491400 |
| H | 2.74328000 | -2.15565900 | -1.75103200 |
| H | 5.92574100 | -0.96037200 | 0.60287600  |
| H | 5.71228000 | 0.73933400  | 1.00294000  |
| H | 3.92170700 | -0.75014900 | 2.05680900  |
| H | 3.27425200 | 0.51866700  | 1.00728100  |
| H | 4.59491000 | 1.13120100  | -1.19307200 |
| O | 2.44815100 | -2.29337600 | 0.74067700  |

### TS3-W:

Zero-point correction=0.539809 (Hartree/Particle)

Thermal correction to Energy=0.569451

Thermal correction to Enthalpy=0.570427

Thermal correction to Gibbs Free Energy=0.480771

Sum of electronic and zero-point Energies=-1226.735814

Sum of electronic and thermal Energies=-1226.706172

Sum of electronic and thermal Enthalpies=-1226.705196

Sum of electronic and thermal Free Energies=-1226.794852

|   |             |             |             |
|---|-------------|-------------|-------------|
| C | -1.96028100 | 0.32919300  | 0.13449400  |
| C | -3.98251000 | -0.22597300 | 0.83949800  |
| H | -5.03476300 | -0.44945900 | 0.76805200  |
| C | -3.15294600 | -0.20774900 | 1.91489700  |
| H | -3.34989500 | -0.43127400 | 2.94999500  |
| N | -3.22760800 | 0.10551500  | -0.25875100 |
| N | -1.90272700 | 0.13640100  | 1.46428400  |
| C | -0.70068200 | 0.27052500  | 2.31307600  |
| H | -0.66807800 | 1.30860900  | 2.66027900  |
| H | 0.16864900  | 0.09282100  | 1.66989400  |
| C | -3.76878100 | 0.24996000  | -1.61556700 |
| H | -2.92100700 | 0.47573800  | -2.26259900 |
| H | -4.45151000 | 1.10659600  | -1.60305800 |
| C | -0.69093000 | -0.69355000 | 3.49104800  |
| H | 0.18291000  | -0.40721500 | 4.08851700  |
| H | -1.55463000 | -0.52004100 | 4.14766000  |
| C | -0.58280300 | -2.16271700 | 3.10138700  |
| H | -0.59232700 | -2.79864600 | 3.99219500  |
| H | -1.39603700 | -2.48125300 | 2.44240100  |
| H | 0.34747300  | -2.34489400 | 2.55683300  |
| C | -4.48462000 | -1.00691600 | -2.09805600 |
| H | -5.35316300 | -1.21332200 | -1.45846000 |

|   |             |             |             |
|---|-------------|-------------|-------------|
| H | -4.89618700 | -0.76253100 | -3.08501200 |
| C | -3.59011500 | -2.23587500 | -2.19181200 |
| H | -2.73847400 | -2.04938100 | -2.85238800 |
| H | -3.18813000 | -2.52486600 | -1.21549500 |
| H | -4.15161500 | -3.08810500 | -2.58582200 |
| C | 1.34399300  | 4.25579900  | 0.03068900  |
| C | 0.06698300  | 4.07177300  | 0.58668900  |
| C | -0.58594400 | 2.87390500  | 0.35578200  |
| C | -0.01029000 | 1.84115800  | -0.40728900 |
| C | 1.30010300  | 2.01254600  | -0.96721600 |
| H | -1.59466500 | 2.74461100  | 0.74667800  |
| H | 1.87295400  | 5.19226300  | 0.19147100  |
| H | -0.40496700 | 4.85702600  | 1.16865700  |
| C | -0.81496900 | 0.67320300  | -0.76133400 |
| N | -0.69495400 | -0.10105800 | -1.78055400 |
| N | 1.86775800  | 1.00864500  | -1.66973800 |
| H | 0.17325200  | 0.16656000  | -2.26835500 |
| H | 2.75914800  | 1.32623100  | -2.04479900 |
| C | 1.93920900  | 3.26066000  | -0.71651100 |
| H | 2.93019800  | 3.41756800  | -1.13796400 |
| O | -0.49905900 | -2.57272000 | -0.26229700 |
| H | -0.77579100 | -2.08041500 | -1.04857500 |
| H | 0.27439800  | -2.04020700 | 0.02442700  |
| C | 2.78144400  | -1.51846400 | -1.49523900 |
| C | 3.63488800  | -2.61852800 | -0.84625300 |
| C | 4.88280100  | -2.03864300 | -0.17747100 |
| C | 4.52987400  | -0.93873800 | 0.82592900  |
| C | 3.69653900  | 0.16388100  | 0.15697800  |
| C | 2.44839300  | -0.49292500 | -0.42231200 |
| H | 5.45106900  | -2.83579300 | 0.31796300  |
| H | 3.02530400  | -3.14192400 | -0.09816400 |
| H | 3.91770600  | -3.36346300 | -1.60015600 |
| H | 3.34154600  | -1.04916800 | -2.31321000 |
| H | 1.85648300  | -1.93150500 | -1.90713400 |
| H | 3.94888600  | -1.36671400 | 1.65335800  |
| H | 5.44125000  | -0.50962800 | 1.26101300  |
| H | 3.40025300  | 0.93427700  | 0.87590900  |
| H | 4.30177200  | 0.63559200  | -0.62766800 |
| H | 5.54399000  | -1.61847800 | -0.95062000 |
| O | 1.50412900  | -0.73619000 | 0.38092700  |

7-W:

Zero-point correction=0.541268 (Hartree/Particle)

Thermal correction to Energy=0.570692  
 Thermal correction to Enthalpy=0.571668  
 Thermal correction to Gibbs Free Energy=0.483177  
 Sum of electronic and zero-point Energies=-1226.740568  
 Sum of electronic and thermal Energies=-1226.711143  
 Sum of electronic and thermal Enthalpies=-1226.710167  
 Sum of electronic and thermal Free Energies=-1226.798658

|   |             |             |             |
|---|-------------|-------------|-------------|
| C | -1.78723100 | 0.36957400  | 0.14784000  |
| C | -3.74981500 | -0.18286800 | 1.00939700  |
| H | -4.79629500 | -0.44110700 | 1.01734400  |
| C | -2.86213900 | -0.05976000 | 2.02930300  |
| H | -2.99061300 | -0.21203300 | 3.08780400  |
| N | -3.07362400 | 0.08801600  | -0.15207900 |
| N | -1.65499200 | 0.29134700  | 1.48549300  |
| C | -0.42631200 | 0.52699000  | 2.27257200  |
| H | -0.42955400 | 1.58361600  | 2.56094700  |
| H | 0.41563200  | 0.32760800  | 1.59109700  |
| C | -3.73696300 | 0.15720000  | -1.46257700 |
| H | -2.95147000 | 0.33038500  | -2.19731600 |
| H | -4.40968500 | 1.02186900  | -1.43541800 |
| C | -0.32224400 | -0.37367200 | 3.49529800  |
| H | 0.58264700  | -0.03913500 | 4.01743200  |
| H | -1.14374400 | -0.19044100 | 4.20264300  |
| C | -0.20035700 | -1.85682800 | 3.16551800  |
| H | -0.07708500 | -2.44626100 | 4.07964800  |
| H | -1.07434900 | -2.23732300 | 2.62796100  |
| H | 0.66165800  | -2.02945100 | 2.51523900  |
| C | -4.50989300 | -1.11298300 | -1.79997200 |
| H | -5.31111400 | -1.27604300 | -1.06706600 |
| H | -5.01810600 | -0.91415900 | -2.75158300 |
| C | -3.64019500 | -2.35731400 | -1.91782100 |
| H | -2.87405800 | -2.22329500 | -2.68812300 |
| H | -3.12830000 | -2.58421500 | -0.97748100 |
| H | -4.24732700 | -3.22573000 | -2.19023700 |
| C | 1.53423300  | 4.30830800  | -0.17481100 |
| C | 0.21564100  | 4.22673900  | 0.27417000  |
| C | -0.47110800 | 3.02855100  | 0.11372500  |
| C | 0.12493200  | 1.91220600  | -0.48471600 |
| C | 1.47732900  | 1.97748600  | -0.90243300 |
| H | -1.51223000 | 2.96834900  | 0.42772200  |
| H | 2.09109000  | 5.23534400  | -0.06702000 |
| H | -0.27208400 | 5.08434900  | 0.72704700  |
| C | -0.73340300 | 0.75674900  | -0.83569400 |

|   |             |             |             |
|---|-------------|-------------|-------------|
| N | -0.78874500 | 0.16842700  | -1.97214900 |
| N | 2.08642600  | 0.88245300  | -1.48568900 |
| H | -0.01645400 | 0.50387000  | -2.55305000 |
| H | 2.98807300  | 1.14932400  | -1.86687700 |
| C | 2.15270600  | 3.20092000  | -0.73949300 |
| H | 3.19261100  | 3.26409900  | -1.05253700 |
| O | -0.63431500 | -2.40179100 | -0.14438800 |
| H | -0.84318300 | -2.28600200 | -1.07644800 |
| H | 0.14085700  | -1.77556900 | -0.01890100 |
| C | 2.48599900  | -1.53455100 | -1.65573100 |
| C | 2.90416100  | -2.83276100 | -0.96755900 |
| C | 4.16185400  | -2.63816300 | -0.12050500 |
| C | 3.98445900  | -1.49593000 | 0.87906100  |
| C | 3.59358700  | -0.20478700 | 0.16548100  |
| C | 2.27895800  | -0.40118200 | -0.63122600 |
| H | 4.41363700  | -3.56886000 | 0.40372700  |
| H | 2.07967900  | -3.17250600 | -0.32896500 |
| H | 3.06831900  | -3.61787600 | -1.71684500 |
| H | 3.25603400  | -1.23798900 | -2.38496800 |
| H | 1.55040900  | -1.66969400 | -2.21110300 |
| H | 3.18810900  | -1.75224600 | 1.58924000  |
| H | 4.90408800  | -1.34795000 | 1.46016100  |
| H | 3.43731500  | 0.61123500  | 0.88208700  |
| H | 4.41317800  | 0.09329200  | -0.50905600 |
| H | 5.01396900  | -2.40990200 | -0.77961500 |
| O | 1.24302600  | -0.59955700 | 0.19370300  |

**TS4-W:**

Zero-point correction=0.539048 (Hartree/Particle)

Thermal correction to Energy=0.568686

Thermal correction to Enthalpy=0.569662

Thermal correction to Gibbs Free Energy=0.478240

Sum of electronic and zero-point Energies=-1226.715190

Sum of electronic and thermal Energies=-1226.685552

Sum of electronic and thermal Enthalpies=-1226.684576

Sum of electronic and thermal Free Energies=-1226.775998

|   |             |            |            |
|---|-------------|------------|------------|
| C | -0.43993300 | 0.88096400 | 0.05137800 |
| C | -0.83380600 | 2.91732000 | 0.94901600 |
| H | -0.59040000 | 3.84395900 | 1.44380600 |
| C | -1.98293800 | 2.49723900 | 0.37497900 |
| H | -2.93471300 | 2.99228900 | 0.26492500 |
| N | 0.09564600  | 1.90958300 | 0.76679100 |

|   |             |             |             |
|---|-------------|-------------|-------------|
| N | -1.73301100 | 1.24438400  | -0.13914800 |
| C | -2.72255000 | 0.49131800  | -0.89950500 |
| H | -2.30041400 | -0.49972600 | -1.06383900 |
| H | -2.82563400 | 0.98135900  | -1.87546000 |
| C | 1.40258200  | 1.94530600  | 1.41935800  |
| H | 1.83075600  | 2.93798400  | 1.23828900  |
| H | 2.04156400  | 1.22288200  | 0.91618600  |
| C | -4.08579600 | 0.39743000  | -0.18712100 |
| H | -4.29975400 | -0.65244500 | 0.04334800  |
| H | -4.02988800 | 0.90530400  | 0.78236200  |
| C | -5.23166100 | 0.97845500  | -1.00887100 |
| H | -6.18534900 | 0.88787700  | -0.47958600 |
| H | -5.06730000 | 2.03952300  | -1.22834200 |
| H | -5.33388700 | 0.45952200  | -1.96809200 |
| C | 1.37054600  | 1.64326600  | 2.91799800  |
| H | 0.93043600  | 0.65127200  | 3.07475600  |
| H | 2.41968600  | 1.56288900  | 3.22981600  |
| C | 0.66344300  | 2.66662800  | 3.79871300  |
| H | 1.06875000  | 3.67396000  | 3.64442200  |
| H | -0.41277000 | 2.70007800  | 3.60472600  |
| H | 0.79634700  | 2.41858400  | 4.85649100  |
| C | 4.58067700  | 0.21906000  | -0.74194200 |
| C | 3.85474500  | 1.23654300  | -1.36741600 |
| C | 2.48164000  | 1.08901600  | -1.52830900 |
| C | 1.81982800  | -0.04541000 | -1.05839300 |
| C | 2.55592900  | -1.08722200 | -0.47574600 |
| H | 1.89165900  | 1.86234900  | -2.01205900 |
| H | 5.65434300  | 0.31783300  | -0.60514500 |
| H | 4.35611000  | 2.12875200  | -1.72983100 |
| C | 0.34249000  | -0.21029400 | -1.26443700 |
| N | -0.09564600 | 0.25150800  | -2.43661500 |
| N | 1.92958400  | -2.27500800 | -0.15306000 |
| H | -0.95787400 | -0.22308000 | -2.68943800 |
| H | 2.44896200  | -2.89489900 | 0.45117700  |
| C | 3.94304100  | -0.93417700 | -0.30633200 |
| H | 4.51629300  | -1.73981100 | 0.14776400  |
| O | -0.56353500 | 2.90171500  | -2.71351100 |
| H | -0.33809700 | 1.92516900  | -2.66612200 |
| H | -0.35074200 | 3.16676400  | -3.61188700 |
| C | 0.02249800  | -3.75201100 | -0.28416300 |
| C | -1.46824400 | -3.95177400 | -0.02765100 |
| C | -1.84024300 | -3.58104100 | 1.40580800  |
| C | -1.40637400 | -2.15321000 | 1.73197800  |
| C | 0.08148800  | -1.94570300 | 1.45901300  |

|   |             |             |             |
|---|-------------|-------------|-------------|
| C | 0.48890700  | -2.32747800 | 0.02537200  |
| H | -2.91964100 | -3.69569000 | 1.56297200  |
| H | -2.03612800 | -3.32882800 | -0.73021700 |
| H | -1.74116000 | -4.99241100 | -0.23874200 |
| H | 0.59921800  | -4.44004900 | 0.35130700  |
| H | 0.28523900  | -3.96685800 | -1.32446300 |
| H | -1.98419500 | -1.44691700 | 1.12408900  |
| H | -1.62561600 | -1.91505700 | 2.78009900  |
| H | 0.37762100  | -0.91135000 | 1.65135900  |
| H | 0.66712900  | -2.57974300 | 2.14106800  |
| H | -1.34799200 | -4.27778100 | 2.10060400  |
| O | -0.13098800 | -1.51075500 | -0.95580000 |

**8-W:**

Zero-point correction=0.298137 (Hartree/Particle)

Thermal correction to Energy=0.315776

Thermal correction to Enthalpy=0.316752

Thermal correction to Gibbs Free Energy=0.250687

Sum of electronic and zero-point Energies= -765.299807

Sum of electronic and thermal Energies=-765.282167

Sum of electronic and thermal Enthalpies=-765.281191

Sum of electronic and thermal Free Energies=-765.347256

|   |             |             |             |
|---|-------------|-------------|-------------|
| C | -3.86372400 | -1.29269700 | -0.06894500 |
| C | -4.07914000 | -0.02709500 | 0.47933100  |
| C | -3.03109300 | 0.87043900  | 0.53948300  |
| C | -1.76785400 | 0.52128500  | 0.06402500  |
| C | -1.55167100 | -0.75871000 | -0.46749200 |
| H | -3.17224900 | 1.86247700  | 0.94851800  |
| H | -4.67998700 | -2.00335800 | -0.12168400 |
| H | -5.05767400 | 0.24928400  | 0.84971300  |
| C | -0.66978200 | 1.49099300  | 0.04358400  |
| N | -0.82418300 | 2.71452200  | 0.34359400  |
| N | -0.30006200 | -1.06178200 | -0.94899900 |
| H | 2.52806100  | 3.49174700  | -1.43501400 |
| H | -0.12974300 | -2.04038200 | -1.13020000 |
| C | 3.38949200  | -1.50073900 | 0.82939000  |
| C | 2.87144600  | -1.79600700 | -0.58420300 |
| C | 2.08493700  | -0.61269700 | -1.12645400 |
| C | 0.81142300  | -0.38437800 | -0.31988700 |
| C | 1.00626300  | -0.78361300 | 1.15095100  |
| C | 2.44397000  | -0.56340200 | 1.59079600  |
| H | 3.50379600  | -2.43879700 | 1.37766300  |



|   |             |             |             |
|---|-------------|-------------|-------------|
| H | 3.69930200  | -2.02825600 | -1.25552100 |
| H | 2.69913900  | 0.28751900  | -1.05570800 |
| H | 0.30605700  | -0.23273900 | 1.78037000  |
| H | 2.53549000  | -0.71933600 | 2.66676700  |
| O | 0.53736500  | 1.03472800  | -0.39931600 |
| H | 0.75187400  | -1.84243300 | 1.24754500  |
| H | 2.71769900  | 0.47970700  | 1.40888300  |
| H | 4.38243500  | -1.04867300 | 0.77335600  |
| H | 2.22919600  | -2.68210400 | -0.57600000 |
| H | 1.81694800  | -0.74115800 | -2.17574800 |
| O | 2.46858700  | 3.19664600  | -0.52325900 |
| H | 0.05674600  | 3.21951000  | 0.26811900  |
| H | 1.92515300  | 2.39916200  | -0.55837800 |
| C | -2.61756800 | -1.66089800 | -0.53732300 |
| H | -2.45035400 | -2.64723200 | -0.95378600 |

**TS5-W:**

Zero-point correction=0.296554 (Hartree/Particle)

Thermal correction to Energy=0.314334

Thermal correction to Enthalpy=0.315309

Thermal correction to Gibbs Free Energy=0.247252

Sum of electronic and zero-point Energies=-765.276755

Sum of electronic and thermal Energies=-765.258975

Sum of electronic and thermal Enthalpies=-765.258000

Sum of electronic and thermal Free Energies=-765.326057

|   |             |             |             |
|---|-------------|-------------|-------------|
| C | 1.01627500  | 3.35430900  | -0.37864800 |
| C | 2.26848500  | 3.05960200  | 0.14668300  |
| C | 2.63737300  | 1.74326100  | 0.38334400  |
| C | 1.75883800  | 0.69964400  | 0.11531600  |
| C | 0.50659800  | 1.01972400  | -0.39932500 |
| H | 3.61678800  | 1.51703200  | 0.78722100  |
| H | 0.73279700  | 4.37972200  | -0.57818600 |
| H | 2.96335400  | 3.86059300  | 0.36735700  |
| C | 2.14529300  | -0.74277400 | 0.34126700  |
| N | 1.69209000  | -1.26929000 | 1.44323400  |
| N | -0.37137200 | -0.06319400 | -0.70833500 |
| H | 4.51162200  | -3.68829800 | 0.27361200  |
| H | 0.03316700  | -0.80390600 | -1.27491100 |
| C | -4.43634700 | -0.61964900 | 0.38153700  |
| C | -3.79077900 | -1.16233000 | -0.90298700 |
| C | -2.30827900 | -1.46894700 | -0.71147100 |
| C | -1.58293500 | -0.24451800 | -0.30375600 |

|   |             |             |             |
|---|-------------|-------------|-------------|
| C | -2.29143700 | 0.71121900  | 0.57760200  |
| C | -3.41195900 | 0.00694500  | 1.33135300  |
| H | -5.19182200 | 0.12122100  | 0.11335500  |
| H | -4.29618600 | -2.06807700 | -1.23665100 |
| H | -2.17974000 | -2.18541800 | 0.11054800  |
| H | -1.58053900 | 1.20716700  | 1.24053100  |
| H | -3.89525200 | 0.72278700  | 1.99583300  |
| O | 2.84022000  | -1.26049100 | -0.58519400 |
| H | -2.70925100 | 1.49361500  | -0.06791600 |
| H | -2.97011300 | -0.76125700 | 1.96955500  |
| H | -4.95764500 | -1.42162000 | 0.90681500  |
| H | -3.88795900 | -0.43509300 | -1.71192200 |
| H | -1.84965400 | -1.91054500 | -1.59634900 |
| O | 3.66532100  | -3.77323300 | -0.16832400 |
| H | 2.00616000  | -2.23927600 | 1.48585900  |
| H | 3.36452100  | -2.84148200 | -0.31751400 |
| C | 0.12877800  | 2.32861400  | -0.66183100 |
| H | -0.83903300 | 2.53941900  | -1.09788400 |

#### 9-W:

Zero-point correction=0.296331 (Hartree/Particle)

Thermal correction to Energy=0.314960

Thermal correction to Enthalpy=0.315936

Thermal correction to Gibbs Free Energy=0.245485

Sum of electronic and zero-point Energies=-765.278053

Sum of electronic and thermal Energies=-765.259424

Sum of electronic and thermal Enthalpies=-765.258448

Sum of electronic and thermal Free Energies=-765.328899

|   |             |             |             |
|---|-------------|-------------|-------------|
| C | 1.54357600  | -3.33912100 | -0.09917300 |
| C | 2.65244400  | -2.65050800 | -0.57357900 |
| C | 2.70288700  | -1.26830200 | -0.48869300 |
| C | 1.64690800  | -0.52831000 | 0.04148000  |
| C | 0.54752100  | -1.24688100 | 0.51102100  |
| H | 3.57239800  | -0.72607000 | -0.83607100 |
| H | 1.50077600  | -4.41957900 | -0.15174000 |
| H | 3.48413500  | -3.19360800 | -1.00550300 |
| C | 1.76672600  | 0.98080700  | 0.06620200  |
| N | 0.66240100  | 1.65190900  | -0.13663800 |
| N | -0.55309200 | -0.55973200 | 1.11959100  |
| H | 0.90413700  | 2.64249700  | -0.13357700 |
| H | -0.44140000 | -0.28540500 | 2.09050900  |
| C | -4.11791400 | 0.68629800  | -0.82238800 |

|   |             |             |             |
|---|-------------|-------------|-------------|
| C | -4.00867200 | 0.39618100  | 0.68181000  |
| C | -2.60771800 | 0.67087700  | 1.21672700  |
| C | -1.60443500 | -0.14909700 | 0.50371900  |
| C | -1.86149700 | -0.46863400 | -0.91783300 |
| C | -2.76928700 | 0.58292900  | -1.54173200 |
| H | -4.82956000 | -0.01232300 | -1.26649800 |
| H | -4.72437900 | 0.99711900  | 1.24228800  |
| H | -2.32295900 | 1.71119600  | 1.00733200  |
| H | -0.92215000 | -0.58450000 | -1.45633700 |
| H | -2.91566000 | 0.34610800  | -2.59537100 |
| O | 2.94150100  | 1.42251500  | 0.24807100  |
| H | -2.35566800 | -1.44979800 | -0.92663500 |
| H | -2.24827300 | 1.54214100  | -1.50615900 |
| H | -4.52378300 | 1.68697100  | -0.98018800 |
| H | -4.25587800 | -0.64836000 | 0.88404200  |
| H | -2.52830300 | 0.52968800  | 2.29518500  |
| O | 3.22636800  | 4.06078600  | 0.02551100  |
| H | 3.47172700  | 4.20815900  | -0.88914800 |
| H | 3.12378100  | 3.07648500  | 0.10463600  |
| C | 0.48984100  | -2.63132200 | 0.45610600  |
| H | -0.37932800 | -3.14185800 | 0.85190800  |

**TS6-W:**

Zero-point correction=0.295529 (Hartree/Particle)

Thermal correction to Energy=0.312334

Thermal correction to Enthalpy=0.313309

Thermal correction to Gibbs Free Energy=0.250082

Sum of electronic and zero-point Energies=-765.299567

Sum of electronic and thermal Energies=-765.282762

Sum of electronic and thermal Enthalpies=-765.281787

Sum of electronic and thermal Free Energies=-765.345014

|   |             |             |             |
|---|-------------|-------------|-------------|
| C | -3.05030700 | -2.42014800 | 0.04130000  |
| C | -3.54909500 | -1.26451100 | 0.63801600  |
| C | -2.74643700 | -0.13985700 | 0.69668500  |
| C | -1.45182900 | -0.14315800 | 0.18280300  |
| C | -0.94594400 | -1.32182900 | -0.39589500 |
| H | -3.11027800 | 0.78118000  | 1.13369700  |
| H | -3.66630100 | -3.30948100 | -0.01908600 |
| H | -4.55235800 | -1.24467600 | 1.04349800  |
| C | -0.68023100 | 1.12878400  | 0.19153200  |
| N | 0.53261400  | 1.08740300  | -0.36256300 |
| N | 0.31806000  | -1.34639600 | -0.94375900 |

|   |             |             |             |
|---|-------------|-------------|-------------|
| H | -3.37617200 | 3.60958900  | -1.08912800 |
| H | 0.59724600  | -2.18767000 | -1.42439500 |
| C | 3.66442000  | 0.77525400  | 0.55263100  |
| C | 3.85968300  | -0.20648700 | -0.59341700 |
| C | 2.54788200  | -0.45584100 | -1.33455000 |
| C | 1.36336300  | -0.57211600 | -0.40507300 |
| C | 1.73748400  | -0.83017700 | 1.02819500  |
| C | 2.68551600  | 0.22414000  | 1.60086300  |
| H | 4.62257500  | 1.00587700  | 1.02145800  |
| H | 4.60565600  | 0.16381600  | -1.29846900 |
| H | 2.34547600  | 0.33506200  | -2.05756100 |
| H | 0.84531100  | -0.93682300 | 1.64495800  |
| H | 3.23775800  | -0.23110200 | 2.42505200  |
| O | -1.18301300 | 2.17397100  | 0.63576800  |
| H | 2.22969500  | -1.81035700 | 1.01709200  |
| H | 2.10340300  | 1.04042900  | 2.03166800  |
| H | 3.29179500  | 1.72038300  | 0.14582600  |
| H | 4.24571900  | -1.15130400 | -0.19953700 |
| H | 2.60721300  | -1.38792800 | -1.90513800 |
| O | -2.52829600 | 4.02225700  | -0.91452100 |
| H | 1.12466400  | 1.89378400  | -0.21826500 |
| H | -2.05179900 | 3.37576600  | -0.36330200 |
| C | -1.76584200 | -2.45204700 | -0.46825100 |
| H | -1.37581400 | -3.35546500 | -0.92311500 |

**Pr:**

Zero-point correction=0.274022 (Hartree/Particle)

Thermal correction to Energy=0.287401

Thermal correction to Enthalpy=0.288376

Thermal correction to Gibbs Free Energy=0.234232

Sum of electronic and zero-point Energies=-688.975220

Sum of electronic and thermal Energies=-688.961842

Sum of electronic and thermal Enthalpies=-688.960866

Sum of electronic and thermal Free Energies=-689.015010

|   |            |             |             |
|---|------------|-------------|-------------|
| C | 3.69621700 | -1.27522000 | 0.25217800  |
| C | 3.94721000 | 0.08297600  | 0.47157600  |
| C | 2.91640200 | 0.99621200  | 0.29731700  |
| C | 1.64367900 | 0.56750500  | -0.08105900 |
| C | 1.38927600 | -0.80064000 | -0.29210700 |
| H | 3.06655300 | 2.06265400  | 0.43793600  |
| H | 4.49489400 | -2.00078200 | 0.38171700  |
| H | 4.93611900 | 0.41755900  | 0.76802400  |

|   |             |             |             |
|---|-------------|-------------|-------------|
| C | 0.56822900  | 1.55354200  | -0.32685200 |
| N | -0.64963200 | 1.00090800  | -0.62228700 |
| N | 0.12992400  | -1.19411800 | -0.71030400 |
| H | -1.39168400 | 1.67474700  | -0.74461300 |
| H | -0.04625600 | -2.18706600 | -0.64111100 |
| C | 2.43584400  | -1.71910500 | -0.12572100 |
| H | 2.25475600  | -2.77823300 | -0.29387300 |
| C | -2.21887100 | -0.78044400 | -1.17426100 |
| C | -3.50626900 | -0.06340700 | -0.76562000 |
| C | -3.80679000 | -0.23926800 | 0.72203300  |
| C | -2.61907400 | 0.19056700  | 1.58075700  |
| C | -1.35033200 | -0.55649300 | 1.17554300  |
| C | -1.01238700 | -0.37734100 | -0.32120600 |
| H | -4.70405400 | 0.32758000  | 0.99590400  |
| H | -3.43576000 | 1.00841500  | -1.00162900 |
| H | -4.33605200 | -0.44145700 | -1.37350200 |
| H | -2.36315500 | -1.86308300 | -1.05084100 |
| H | -1.97375100 | -0.60258400 | -2.22654900 |
| H | -2.45751600 | 1.27263700  | 1.47942300  |
| H | -2.82904900 | 0.01279500  | 2.64157500  |
| H | -0.49201700 | -0.23243600 | 1.77516800  |
| H | -1.48759400 | -1.63143200 | 1.36338100  |
| H | -4.03161500 | -1.29720600 | 0.92137000  |
| O | 0.74191700  | 2.76713300  | -0.32246300 |

**Gas:**

**TS1-1**

Zero-point correction=0.348445 (Hartree/Particle)

Thermal correction to Energy=0.368105

Thermal correction to Enthalpy=0.369049

Thermal correction to Gibbs Free Energy=0.297562

Sum of electronic and zero-point Energies=-860.461333

Sum of electronic and thermal Energies=-860.441673

Sum of electronic and thermal Enthalpies=-860.440729

Sum of electronic and thermal Free Energies=-860.512216

|   |            |             |             |
|---|------------|-------------|-------------|
| C | 3.29400700 | 0.02177400  | -1.97902600 |
| C | 2.03569500 | -0.05545900 | -1.39688600 |
| C | 1.89446200 | -0.34153000 | -0.03856500 |
| C | 3.04796900 | -0.56635000 | 0.75455100  |
| C | 4.31178100 | -0.48145100 | 0.16247900  |
| C | 4.42827700 | -0.18971000 | -1.19007400 |
| H | 3.39355700 | 0.24273000  | -3.03713700 |
| H | 1.12699400 | 0.09763900  | -1.97145300 |

|   |             |             |             |
|---|-------------|-------------|-------------|
| H | 5.18508600  | -0.65180600 | 0.78390000  |
| H | 5.41733500  | -0.12935700 | -1.63613100 |
| C | 0.64544500  | -0.45235800 | 0.68682200  |
| N | 0.18846200  | -0.71540700 | 1.75134500  |
| C | -0.94157100 | 0.13953800  | -0.71010100 |
| C | -3.18093500 | 0.02393100  | -1.03014900 |
| H | -4.13839800 | -0.44687000 | -1.19221700 |
| C | -2.85427100 | 1.33617100  | -0.92259000 |
| H | -3.47380700 | 2.21882600  | -0.97030300 |
| N | -2.00249400 | -0.68432400 | -0.89123300 |
| N | -1.48649100 | 1.38123000  | -0.72563700 |
| C | -0.71937500 | 2.61026600  | -0.56740200 |
| H | -0.81186100 | 3.19700300  | -1.48951300 |
| H | 0.32624400  | 2.30675400  | -0.46955300 |
| C | -1.88983400 | -2.13627300 | -0.97000700 |
| H | -0.86788300 | -2.37381500 | -0.66552900 |
| H | -2.00808700 | -2.44036400 | -2.01744100 |
| C | -1.15399900 | 3.44222800  | 0.63549800  |
| H | -0.57276200 | 4.37252000  | 0.61002300  |
| H | -2.20342800 | 3.74147300  | 0.51282000  |
| C | -0.96158900 | 2.73879600  | 1.97232300  |
| H | -1.30577100 | 3.37138100  | 2.79630100  |
| H | -1.51236600 | 1.79466200  | 2.01607900  |
| H | 0.09232700  | 2.50073400  | 2.14742400  |
| C | -2.89410400 | -2.87419800 | -0.09078600 |
| H | -3.91393400 | -2.68437600 | -0.45155300 |
| H | -2.72123200 | -3.94603900 | -0.24884500 |
| C | -2.78796000 | -2.53940200 | 1.39146400  |
| H | -2.99494800 | -1.48148800 | 1.57961300  |
| H | -3.50213500 | -3.13146600 | 1.97228400  |
| H | -1.78219200 | -2.73455300 | 1.77403800  |
| O | 2.96451300  | -0.85718700 | 2.05863100  |
| H | 2.01084100  | -0.89242500 | 2.30150500  |

## TS1-2

Zero-point correction=0.375833 (Hartree/Particle)

Thermal correction to Energy=0.397398

Thermal correction to Enthalpy=0.398342

Thermal correction to Gibbs Free Energy=0.322886

Sum of electronic and zero-point Energies=-899.664678

Sum of electronic and thermal Energies=-899.643113

Sum of electronic and thermal Enthalpies=-899.642168

Sum of electronic and thermal Free Energies=-899.717624

|   |             |             |             |
|---|-------------|-------------|-------------|
| C | 3.42204700  | 0.47283500  | 2.10180100  |
| C | 2.08986700  | 0.29677600  | 2.47266000  |
| C | 1.16485400  | -0.13032800 | 1.52627700  |
| C | 1.54220000  | -0.41912600 | 0.21124500  |
| C | 2.89383400  | -0.24851500 | -0.15181200 |
| H | 0.11478000  | -0.23560600 | 1.78452800  |
| H | 4.15273700  | 0.82305700  | 2.82571900  |
| H | 1.77097200  | 0.50073500  | 3.49090200  |
| C | 0.55817200  | -0.90621600 | -0.76926400 |
| N | 0.47211900  | -1.62954400 | -1.72063800 |
| C | 3.81465000  | 0.20745900  | 0.79368700  |
| H | 4.84104000  | 0.35780000  | 0.47169000  |
| O | 3.32723400  | -0.42212200 | -1.43259000 |
| C | 3.64057600  | -1.76416000 | -1.79724600 |
| H | 4.01349900  | -1.71734200 | -2.82200700 |
| H | 4.42482400  | -2.16602400 | -1.14183200 |
| H | 2.74441200  | -2.39091800 | -1.76448700 |
| C | -1.11543100 | -0.05758300 | -0.40872400 |
| C | -3.23059100 | -0.11274500 | -1.19980900 |
| H | -4.20529600 | -0.53265200 | -1.39750700 |
| C | -2.70378100 | 1.09129700  | -1.53665100 |
| H | -3.12886700 | 1.91571900  | -2.08879300 |
| N | -2.25241000 | -0.79118000 | -0.50199500 |
| N | -1.41599800 | 1.10838600  | -1.03411200 |
| C | -0.48536500 | 2.21530600  | -1.19828300 |
| H | -0.39857000 | 2.43365100  | -2.26860100 |
| H | 0.48879500  | 1.85911100  | -0.85537900 |
| C | -2.38391000 | -2.15519400 | -0.01690700 |
| H | -1.38144800 | -2.47842000 | 0.27214900  |
| H | -2.69408000 | -2.78617900 | -0.85694000 |
| C | -0.90017700 | 3.46446600  | -0.42613300 |
| H | -0.17096200 | 4.24884200  | -0.66345600 |
| H | -1.86719300 | 3.82458900  | -0.80160200 |
| C | -0.97049700 | 3.25422600  | 1.08066500  |
| H | -1.24842300 | 4.18100100  | 1.59197900  |
| H | -1.71388000 | 2.49349000  | 1.34085600  |
| H | -0.00525300 | 2.92325900  | 1.47855100  |
| C | -3.36019700 | -2.27993500 | 1.14913500  |
| H | -4.35739300 | -1.94948800 | 0.82948100  |
| H | -3.45462000 | -3.34708200 | 1.38493700  |
| C | -2.92930700 | -1.50719000 | 2.38880500  |
| H | -2.83170900 | -0.43751600 | 2.17577600  |
| H | -3.65792800 | -1.62167400 | 3.19719100  |

|   |             |             |            |
|---|-------------|-------------|------------|
| H | -1.96096200 | -1.86326700 | 2.75810000 |
|---|-------------|-------------|------------|

### TS1-3

Zero-point correction=0.371327 (Hartree/Particle)

Thermal correction to Energy=0.391604

Thermal correction to Enthalpy=0.392548

Thermal correction to Gibbs Free Energy=0.320304

Sum of electronic and zero-point Energies=-824.542740

Sum of electronic and thermal Energies=-824.522463

Sum of electronic and thermal Enthalpies=-824.521519

Sum of electronic and thermal Free Energies=-824.593763

|   |             |             |             |
|---|-------------|-------------|-------------|
| C | -4.35065000 | -0.20311100 | -1.24013700 |
| C | -3.20297600 | -0.18254000 | -2.02651900 |
| C | -1.95558500 | -0.14947100 | -1.41200200 |
| C | -1.82915700 | -0.13904400 | -0.02137500 |
| C | -2.99160200 | -0.16243400 | 0.78735900  |
| H | -1.04327300 | -0.13069000 | -2.00152500 |
| H | -5.33427800 | -0.22751800 | -1.70139700 |
| H | -3.27570100 | -0.19177500 | -3.11052600 |
| C | -0.51313900 | -0.10935800 | 0.63806600  |
| N | -0.01487600 | -0.13407100 | 1.72695000  |
| C | -4.23411500 | -0.19249300 | 0.14799300  |
| H | -5.13271100 | -0.20841100 | 0.76036900  |
| C | -2.92495100 | -0.15614200 | 2.28523500  |
| H | -3.93184400 | -0.15933800 | 2.71260100  |
| H | -2.37242600 | -1.02258000 | 2.66186500  |
| H | -2.38003300 | 0.71754400  | 2.65620600  |
| C | 0.88530400  | 0.03205100  | -0.70308400 |
| C | 2.95338900  | 0.90796100  | -0.95696200 |
| H | 3.70092400  | 1.68003900  | -1.05549700 |
| C | 3.08001800  | -0.44250900 | -0.95653800 |
| H | 3.95829700  | -1.06146700 | -1.05603600 |
| N | 1.60587600  | 1.17659300  | -0.80584700 |
| N | 1.80698900  | -0.95770200 | -0.80453800 |
| C | 1.47568600  | -2.37743200 | -0.79901900 |
| H | 1.59259100  | -2.76517300 | -1.81892400 |
| H | 0.41593500  | -2.44125400 | -0.53854200 |
| C | 1.01990400  | 2.51126900  | -0.80565100 |
| H | -0.04868700 | 2.37618600  | -0.61839000 |
| H | 1.12954000  | 2.93643700  | -1.81128300 |
| C | 2.31598700  | -3.19665700 | 0.17501100  |
| H | 2.04077300  | -4.24823500 | 0.02467700  |



|   |            |             |             |
|---|------------|-------------|-------------|
| H | 3.37552700 | -3.12701700 | -0.10531200 |
| C | 2.12929700 | -2.80748500 | 1.63540200  |
| H | 2.77873900 | -3.40729600 | 2.28094900  |
| H | 2.35265900 | -1.75033900 | 1.80473100  |
| H | 1.09418100 | -2.95898500 | 1.95577800  |
| C | 1.63413300 | 3.44564500  | 0.23178700  |
| H | 2.70902200 | 3.55367100  | 0.03473600  |
| H | 1.20119800 | 4.43978000  | 0.06284500  |
| C | 1.40363500 | 3.00839800  | 1.67213300  |
| H | 1.77367400 | 1.99520800  | 1.85370000  |
| H | 1.90249800 | 3.69022400  | 2.36810500  |
| H | 0.33641200 | 2.99735700  | 1.91471700  |

#### TS1-4

Zero-point correction=0.343486 (Hartree/Particle)

Thermal correction to Energy=0.362317

Thermal correction to Enthalpy=0.363261

Thermal correction to Gibbs Free Energy=0.293127

Sum of electronic and zero-point Energies=-785.299262

Sum of electronic and thermal Energies=-785.280432

Sum of electronic and thermal Enthalpies=-785.279488

Sum of electronic and thermal Free Energies=-785.349622

|   |             |             |             |
|---|-------------|-------------|-------------|
| C | 3.59074000  | 0.01598900  | -1.52464000 |
| C | 2.27119100  | 0.01222200  | -1.07623100 |
| C | 1.98846300  | 0.01388000  | 0.28961100  |
| C | 3.05099400  | 0.01949500  | 1.20711400  |
| C | 4.36572200  | 0.02318400  | 0.75791500  |
| C | 4.64170200  | 0.02142400  | -0.61084200 |
| H | 3.79702500  | 0.01471000  | -2.59162700 |
| H | 1.43869100  | 0.00806500  | -1.77415100 |
| H | 2.81902300  | 0.02085800  | 2.26793300  |
| H | 5.18014500  | 0.02745800  | 1.47724600  |
| H | 5.67044800  | 0.02432100  | -0.96059600 |
| C | 0.62737800  | 0.01032900  | 0.84490200  |
| N | 0.04772200  | 0.01212400  | 1.88880300  |
| C | -0.67289800 | -0.00253000 | -0.64720000 |
| C | -2.77900900 | -0.69810500 | -1.08517500 |
| H | -3.57825000 | -1.40310900 | -1.25438900 |
| C | -2.79008900 | 0.65832300  | -1.08531800 |
| H | -3.60079000 | 1.35012500  | -1.25457200 |
| N | -1.47809000 | -1.08033000 | -0.81846800 |

|   |             |             |             |
|---|-------------|-------------|-------------|
| N | -1.49567900 | 1.06183000  | -0.81866100 |
| C | -1.04979200 | 2.44890400  | -0.76841500 |
| H | -1.07472400 | 2.85809200  | -1.78628800 |
| H | -0.00533900 | 2.42099200  | -0.44697900 |
| C | -1.00971000 | -2.45997000 | -0.76867200 |
| H | 0.03646200  | -2.41471400 | -0.45485600 |
| H | -1.03531600 | -2.87141400 | -1.78560900 |
| C | -1.87614400 | 3.32148400  | 0.17077500  |
| H | -1.51069700 | 4.34951600  | 0.05310000  |
| H | -2.92038900 | 3.33898800  | -0.16878800 |
| C | -1.80324300 | 2.90111700  | 1.63262000  |
| H | -2.43617700 | 3.54486100  | 2.25162400  |
| H | -2.12196600 | 1.86433400  | 1.77326500  |
| H | -0.77873800 | 2.96353600  | 2.01175600  |
| C | -1.81531700 | -3.34377700 | 0.17807500  |
| H | -2.86219300 | -3.37588400 | -0.15218700 |
| H | -1.43656200 | -4.36666900 | 0.05765200  |
| C | -1.73523200 | -2.92147000 | 1.63896000  |
| H | -2.06587000 | -1.88872700 | 1.78184200  |
| H | -2.35432400 | -3.57284800 | 2.26393600  |
| H | -0.70667800 | -2.97085900 | 2.00909300  |

### TS1-5

Zero-point correction=0.348227 (Hartree/Particle)

Thermal correction to Energy=0.370594

Thermal correction to Enthalpy=0.371538

Thermal correction to Gibbs Free Energy=0.293658

Sum of electronic and zero-point Energies=-1122.032087

Sum of electronic and thermal Energies=-1122.009719

Sum of electronic and thermal Enthalpies=-1122.008775

Sum of electronic and thermal Free Energies=-1122.086655

|   |             |             |             |
|---|-------------|-------------|-------------|
| C | -3.41940300 | -0.88631800 | 2.38237400  |
| C | -2.11814500 | -1.05620400 | 2.84034200  |
| C | -1.05168800 | -0.90374600 | 1.96081000  |
| C | -1.24812700 | -0.60116800 | 0.61165400  |
| C | -2.57327600 | -0.42986200 | 0.15469000  |
| H | -0.02798300 | -1.01557700 | 2.30434200  |
| H | -4.26345800 | -0.99470000 | 3.05679500  |
| H | -1.92918200 | -1.30623600 | 3.88059400  |
| C | -0.09211800 | -0.53321100 | -0.30307800 |
| N | 0.19854400  | -0.71525600 | -1.44711500 |
| C | -3.63783400 | -0.56872100 | 1.04473400  |

|   |             |             |             |
|---|-------------|-------------|-------------|
| H | -4.64903800 | -0.42157000 | 0.68345900  |
| C | -2.90138500 | -0.08701300 | -1.28122400 |
| F | -2.65686700 | -1.09639100 | -2.12560500 |
| F | -2.23194300 | 0.99559100  | -1.71628700 |
| F | -4.21636900 | 0.21069800  | -1.41900800 |
| C | 1.46313500  | 0.01552100  | 0.75788700  |
| C | 3.70953700  | 0.22464300  | 0.68390400  |
| H | 4.73519200  | -0.09784200 | 0.59435300  |
| C | 3.19376400  | 1.46288200  | 0.88469600  |
| H | 3.68518800  | 2.41746700  | 0.99348200  |
| N | 2.63805300  | -0.64219400 | 0.60480000  |
| N | 1.81949100  | 1.31172300  | 0.92651800  |
| C | 0.87546400  | 2.40473800  | 1.12497500  |
| H | 1.01864100  | 2.80822600  | 2.13486400  |
| H | -0.12239400 | 1.96145400  | 1.08351500  |
| C | 2.73567000  | -2.08406000 | 0.39982600  |
| H | 1.73137200  | -2.41682800 | 0.12888100  |
| H | 3.00919000  | -2.55573400 | 1.35192300  |
| C | 1.01543500  | 3.51175900  | 0.08422800  |
| H | 0.29820200  | 4.29691900  | 0.35418200  |
| H | 2.00858700  | 3.97221000  | 0.17133900  |
| C | 0.77396700  | 3.04622500  | -1.34570400 |
| H | 0.89529100  | 3.87692600  | -2.04763000 |
| H | 1.47133000  | 2.25437600  | -1.63602100 |
| H | -0.23528400 | 2.64318500  | -1.46890300 |
| C | 3.72840800  | -2.47943900 | -0.68828900 |
| H | 4.74940000  | -2.21905600 | -0.37764100 |
| H | 3.70944000  | -3.57518700 | -0.73957700 |
| C | 3.42124600  | -1.88733700 | -2.05813400 |
| H | 3.49193200  | -0.79540500 | -2.04813500 |
| H | 4.12588400  | -2.26431700 | -2.80611100 |
| H | 2.40378500  | -2.12945100 | -2.37717600 |

## TS1-6

Zero-point correction=0.345972 (Hartree/Particle)

Thermal correction to Energy=0.367588

Thermal correction to Enthalpy=0.368532

Thermal correction to Gibbs Free Energy=0.291683

Sum of electronic and zero-point Energies=-989.592793

Sum of electronic and thermal Energies=-989.571177

Sum of electronic and thermal Enthalpies=-989.570233

Sum of electronic and thermal Free Energies=-989.647083

|   |             |             |             |
|---|-------------|-------------|-------------|
| C | -3.82508400 | 1.62557500  | -1.48410600 |
| C | -2.56977000 | 2.06041700  | -1.90393400 |
| C | -1.42215300 | 1.63519100  | -1.24178500 |
| C | -1.49211300 | 0.76893700  | -0.14877300 |
| C | -2.76598000 | 0.33098100  | 0.23382900  |
| H | -0.43949300 | 1.96985800  | -1.55825000 |
| H | -4.72375500 | 1.95557500  | -1.99583100 |
| H | -2.48312200 | 2.73993900  | -2.74674300 |
| C | -0.30291000 | 0.45949700  | 0.65158100  |
| N | 0.05799300  | 0.36426900  | 1.78103000  |
| C | -3.92440000 | 0.75539700  | -0.40370200 |
| H | -4.88432500 | 0.39071500  | -0.05353100 |
| N | -2.93485100 | -0.66663200 | 1.29448600  |
| O | -3.78462600 | -0.44393500 | 2.14032300  |
| O | -2.25796800 | -1.67840100 | 1.21813100  |
| C | 1.19630900  | 0.19330300  | -0.69587200 |
| C | 3.43158600  | 0.01595500  | -0.96930000 |
| H | 4.46420000  | 0.32779600  | -0.94127900 |
| C | 2.87675800  | -1.14934100 | -1.38721700 |
| H | 3.33726700  | -2.04177600 | -1.78223500 |
| N | 2.38930600  | 0.81657300  | -0.54424800 |
| N | 1.51220200  | -1.02009500 | -1.20661700 |
| C | 0.53685100  | -2.06641300 | -1.49487600 |
| H | 0.48626800  | -2.20817200 | -2.58129700 |
| H | -0.43068700 | -1.68666100 | -1.15885900 |
| C | 2.53229400  | 2.16452800  | -0.00509800 |
| H | 1.55990200  | 2.42005900  | 0.42240500  |
| H | 2.73603400  | 2.85558500  | -0.83272700 |
| C | 0.85615100  | -3.38519700 | -0.79664700 |
| H | 0.07309600  | -4.09568000 | -1.08880700 |
| H | 1.79466900  | -3.79522700 | -1.19347300 |
| C | 0.92585500  | -3.27514600 | 0.72111200  |
| H | 1.14703900  | -4.24939600 | 1.16777500  |
| H | 1.70722900  | -2.57652200 | 1.03672800  |
| H | -0.01886000 | -2.91414300 | 1.13671400  |
| C | 3.61749300  | 2.28165500  | 1.06026900  |
| H | 4.60492600  | 2.11522200  | 0.60888700  |
| H | 3.61778300  | 3.32843700  | 1.38878900  |
| C | 3.41686700  | 1.35793700  | 2.25538400  |
| H | 3.48929900  | 0.30533600  | 1.96467600  |
| H | 4.17677900  | 1.54768800  | 3.01981200  |
| H | 2.42742700  | 1.49160200  | 2.70187300  |

TS2-1

Zero-point correction=0.329146 (Hartree/Particle)  
 Thermal correction to Energy=0.346254  
 Thermal correction to Enthalpy=0.347198  
 Thermal correction to Gibbs Free Energy=0.283818  
 Sum of electronic and zero-point Energies=-654.140259  
 Sum of electronic and thermal Energies=-654.123151  
 Sum of electronic and thermal Enthalpies=-654.122207  
 Sum of electronic and thermal Free Energies=-654.185587

|   |             |             |             |
|---|-------------|-------------|-------------|
| C | 0.57218600  | 1.97705400  | -0.08874800 |
| O | 1.83199900  | 2.00103200  | -0.02269200 |
| C | -0.05507000 | 2.63754900  | -1.32163300 |
| H | 0.11490600  | 3.71754700  | -1.22922200 |
| H | 0.45837600  | 2.29641800  | -2.22408500 |
| H | -1.13187200 | 2.46906000  | -1.42818200 |
| C | -0.17206100 | 2.25712300  | 1.21790400  |
| H | 0.05300500  | 3.29435100  | 1.49502000  |
| H | -1.25978800 | 2.15211200  | 1.15345300  |
| H | 0.20933500  | 1.60855100  | 2.00977500  |
| C | 0.00758400  | 0.09819200  | -0.46955400 |
| C | 0.31297800  | -2.00540600 | -1.23183300 |
| H | 0.87760200  | -2.87393200 | -1.53561800 |
| C | -1.02192700 | -1.77895600 | -1.21030800 |
| H | -1.84927800 | -2.41224300 | -1.49149200 |
| N | 0.92052700  | -0.85108200 | -0.78166900 |
| N | -1.18838000 | -0.49016600 | -0.73959600 |
| C | -2.50406200 | 0.10818900  | -0.55486700 |
| H | -3.00585200 | 0.14231600  | -1.52904100 |
| H | -2.34542300 | 1.13627100  | -0.23042200 |
| C | 2.37590100  | -0.73960500 | -0.64265200 |
| H | 2.59595300  | 0.33000600  | -0.57611800 |
| H | 2.81509400  | -1.14983000 | -1.55864700 |
| C | -3.36376500 | -0.64383500 | 0.45856800  |
| H | -4.33940500 | -0.14307300 | 0.48745700  |
| H | -3.55842100 | -1.66030000 | 0.09304500  |
| C | -2.76167700 | -0.70100300 | 1.85634500  |
| H | -3.41541700 | -1.25300700 | 2.53822900  |
| H | -1.78730300 | -1.20009400 | 1.85066900  |
| H | -2.61582200 | 0.30233500  | 2.26917600  |
| C | 2.90150300  | -1.47964100 | 0.58374100  |
| H | 2.67094600  | -2.55192600 | 0.50912500  |
| H | 3.99529000  | -1.39811300 | 0.55434700  |
| C | 2.37808700  | -0.91558500 | 1.89847300  |

|   |            |             |            |
|---|------------|-------------|------------|
| H | 1.29591800 | -1.06062300 | 1.98954000 |
| H | 2.85090200 | -1.40982200 | 2.75317900 |
| H | 2.57216500 | 0.16001900  | 1.95758800 |

## TS2-2

Zero-point correction=0.306325 (Hartree/Particle)

Thermal correction to Energy=0.325607

Thermal correction to Enthalpy=0.326551

Thermal correction to Gibbs Free Energy=0.257433

Sum of electronic and zero-point Energies=-951.642510

Sum of electronic and thermal Energies=-951.623228

Sum of electronic and thermal Enthalpies=-951.622284

Sum of electronic and thermal Free Energies=-951.691402

|   |             |             |             |
|---|-------------|-------------|-------------|
| C | -1.80040300 | 0.11809900  | -0.90048700 |
| O | -2.07954400 | 1.28896700  | -1.15370400 |
| C | -1.84673400 | -0.93635400 | -1.98671900 |
| H | -2.90097500 | -1.08490000 | -2.24933800 |
| H | -1.33029200 | -0.55334400 | -2.86838200 |
| H | -1.42464800 | -1.89703900 | -1.69156600 |
| C | -2.16634400 | -0.37884100 | 0.51700500  |
| C | 0.42283100  | 0.06527400  | -0.56268100 |
| C | 2.41284200  | 1.00611900  | -1.09739900 |
| H | 3.10592400  | 1.80817000  | -1.30114700 |
| C | 2.58885200  | -0.33744200 | -1.10591600 |
| H | 3.46420600  | -0.93157900 | -1.31977000 |
| N | 1.09239200  | 1.22761500  | -0.76157800 |
| N | 1.36713200  | -0.89083200 | -0.77306100 |
| C | 1.16946800  | -2.32433400 | -0.60063800 |
| H | 1.36279000  | -2.82215800 | -1.55838100 |
| H | 0.11975800  | -2.46598000 | -0.34619400 |
| C | 0.53936800  | 2.56712300  | -0.56746000 |
| H | -0.53676100 | 2.44857100  | -0.43413600 |
| H | 0.69902400  | 3.13282400  | -1.49236600 |
| C | 2.05170700  | -2.91679300 | 0.49601400  |
| H | 1.85537600  | -3.99593900 | 0.51688000  |
| H | 3.10910700  | -2.80793100 | 0.22214100  |
| C | 1.80304300  | -2.31277700 | 1.87199200  |
| H | 2.43736300  | -2.78897200 | 2.62571100  |
| H | 2.02159300  | -1.24003900 | 1.88175300  |
| H | 0.75950100  | -2.43883700 | 2.17743800  |
| C | 1.17355400  | 3.29287700  | 0.61636700  |
| H | 2.24894500  | 3.43057000  | 0.43901100  |

|   |             |             |            |
|---|-------------|-------------|------------|
| H | 0.73949100  | 4.30008900  | 0.64024900 |
| C | 0.95120200  | 2.60013000  | 1.95428000 |
| H | 1.39519000  | 1.59910000  | 1.96490100 |
| H | 1.40294700  | 3.17344000  | 2.76982200 |
| H | -0.11619900 | 2.48672200  | 2.16643500 |
| F | -1.83744000 | 0.49155500  | 1.47348000 |
| F | -1.63120100 | -1.57571600 | 0.84824700 |
| F | -3.50791100 | -0.54700200 | 0.56970600 |

### TS2-3

Zero-point correction=0.383111 (Hartree/Particle)

Thermal correction to Energy=0.403147

Thermal correction to Enthalpy=0.404091

Thermal correction to Gibbs Free Energy=0.333362

Sum of electronic and zero-point Energies=-845.610636

Sum of electronic and thermal Energies=-845.590600

Sum of electronic and thermal Enthalpies=-845.589656

Sum of electronic and thermal Free Energies=-845.660385

|   |             |             |             |
|---|-------------|-------------|-------------|
| C | -2.64232200 | -1.28601900 | -1.69273000 |
| C | -1.45252300 | -1.38957900 | -0.98167600 |
| C | -1.40671400 | -1.11527900 | 0.38908000  |
| C | -2.59507300 | -0.76768900 | 1.03736600  |
| C | -3.79584500 | -0.67177900 | 0.32951000  |
| C | -3.82260500 | -0.92304800 | -1.03901600 |
| H | -2.65621200 | -1.49955300 | -2.75859800 |
| H | -0.53580000 | -1.70743300 | -1.46909000 |
| H | -2.59889800 | -0.58333900 | 2.10827300  |
| H | -4.71148600 | -0.41056700 | 0.85403100  |
| H | -4.75576500 | -0.85155300 | -1.59122700 |
| C | -0.08277600 | -1.32988100 | 1.12186500  |
| O | 0.59001500  | -2.32385000 | 0.72932300  |
| C | -0.11139600 | -1.06704800 | 2.62957600  |
| H | -0.51819400 | -0.08973500 | 2.91136100  |
| H | -0.71413600 | -1.85201300 | 3.10293100  |
| H | 0.90682300  | -1.15336200 | 3.01548400  |
| C | 0.91666200  | 0.32175700  | 0.61250500  |
| C | 2.75366000  | 1.53855900  | 0.13348900  |
| H | 3.79507100  | 1.71136500  | -0.09158500 |
| C | 1.72360500  | 2.40612500  | 0.27772100  |
| H | 1.69385100  | 3.48183200  | 0.19948200  |
| N | 2.24156200  | 0.27410600  | 0.34357000  |
| N | 0.60900800  | 1.64256800  | 0.56709300  |

|   |             |             |             |
|---|-------------|-------------|-------------|
| C | -0.70438400 | 2.21973500  | 0.83508600  |
| H | -0.65257500 | 2.76341700  | 1.78621600  |
| H | -1.39470700 | 1.38463400  | 0.95740200  |
| C | 3.07929600  | -0.92924400 | 0.29898700  |
| H | 2.45001400  | -1.75327300 | 0.64938500  |
| H | 3.90622600  | -0.77301700 | 1.00118200  |
| C | -1.19387000 | 3.14125800  | -0.27781600 |
| H | -2.16251100 | 3.54046700  | 0.04712700  |
| H | -0.52804900 | 4.00964700  | -0.36664800 |
| C | -1.34134900 | 2.44909100  | -1.62635900 |
| H | -1.71458100 | 3.14739100  | -2.38183300 |
| H | -0.38245100 | 2.05614900  | -1.98029400 |
| H | -2.03883500 | 1.60792000  | -1.56419400 |
| C | 3.61288000  | -1.21568800 | -1.10105600 |
| H | 4.24871000  | -0.38750800 | -1.44446700 |
| H | 4.27185200  | -2.08840600 | -1.01400800 |
| C | 2.51599500  | -1.49540600 | -2.12014700 |
| H | 1.88063100  | -0.61559500 | -2.27029900 |
| H | 2.94316600  | -1.76566500 | -3.09104700 |
| H | 1.87429400  | -2.31291800 | -1.77712000 |

#### TS2-4

Zero-point correction=0.354822 (Hartree/Particle)

Thermal correction to Energy=0.373658

Thermal correction to Enthalpy=0.374602

Thermal correction to Gibbs Free Energy=0.305860

Sum of electronic and zero-point Energies=-806.366968

Sum of electronic and thermal Energies=-806.348132

Sum of electronic and thermal Enthalpies=-806.347188

Sum of electronic and thermal Free Energies=-806.415929

|   |             |             |             |
|---|-------------|-------------|-------------|
| C | -2.62525600 | 2.09457100  | -0.82603700 |
| C | -1.56404000 | 1.72270300  | -0.00719100 |
| C | -1.68121400 | 0.63517200  | 0.86033700  |
| C | -2.88725400 | -0.06288100 | 0.91465400  |
| C | -3.95377100 | 0.30350300  | 0.09388200  |
| C | -3.82488400 | 1.38035100  | -0.78098700 |
| H | -2.52149700 | 2.93980500  | -1.50157400 |
| H | -0.62481400 | 2.27090700  | -0.05105600 |
| H | -2.96956000 | -0.88321300 | 1.62321700  |
| H | -4.89047100 | -0.24572300 | 0.14506700  |
| H | -4.65533400 | 1.66961800  | -1.41934400 |
| C | -0.56624000 | 0.23827800  | 1.80473500  |



|   |             |             |             |
|---|-------------|-------------|-------------|
| O | -0.70741800 | -0.73470400 | 2.56824900  |
| H | 0.03040200  | 1.11688600  | 2.13132500  |
| C | 0.94278100  | -0.31973700 | 0.50792600  |
| C | 2.33692600  | -1.99336400 | -0.08953300 |
| H | 2.61329400  | -2.99502800 | -0.38266600 |
| C | 3.10058800  | -0.89549200 | 0.13585200  |
| H | 4.16964000  | -0.75763100 | 0.08007900  |
| N | 1.02972600  | -1.61823900 | 0.14361400  |
| N | 2.22708500  | 0.11492400  | 0.49776200  |
| C | 2.64696600  | 1.47016500  | 0.82229200  |
| H | 3.33079800  | 1.42581600  | 1.67793700  |
| H | 1.75036900  | 2.00589600  | 1.14301400  |
| C | -0.11343500 | -2.51359500 | 0.01577100  |
| H | -0.93278700 | -2.05076900 | 0.56793200  |
| H | 0.13675200  | -3.44601800 | 0.53303100  |
| C | 3.30871900  | 2.18881800  | -0.35062500 |
| H | 3.64812500  | 3.16542200  | 0.01591800  |
| H | 4.21547200  | 1.64545900  | -0.64627200 |
| C | 2.39526300  | 2.36912100  | -1.55542900 |
| H | 2.91909300  | 2.87838900  | -2.36989900 |
| H | 2.04058300  | 1.40591500  | -1.93560900 |
| H | 1.51459000  | 2.96825200  | -1.29974600 |
| C | -0.48832700 | -2.78840800 | -1.43834000 |
| H | 0.33950300  | -3.31023100 | -1.93788600 |
| H | -1.32915300 | -3.49315400 | -1.42513700 |
| C | -0.86638100 | -1.53960100 | -2.22402300 |
| H | -0.02728300 | -0.83870800 | -2.28191500 |
| H | -1.15649500 | -1.79743400 | -3.24745300 |
| H | -1.70220800 | -1.01123900 | -1.75427900 |

## TS2-5

Zero-point correction=0.360254 (Hartree/Particle)

Thermal correction to Energy=0.382475

Thermal correction to Enthalpy=0.383419

Thermal correction to Gibbs Free Energy=0.307564

Sum of electronic and zero-point Energies=-1143.110075

Sum of electronic and thermal Energies=-1143.087854

Sum of electronic and thermal Enthalpies=-1143.086909

Sum of electronic and thermal Free Energies=-1143.162764

|   |             |             |             |
|---|-------------|-------------|-------------|
| C | -3.83743500 | -0.16902000 | 0.25602000  |
| C | -2.65666300 | -0.76622600 | -0.18683800 |
| C | -1.51363600 | -0.75081300 | 0.61864300  |

|   |             |             |             |
|---|-------------|-------------|-------------|
| C | -1.58101800 | -0.14741900 | 1.87865900  |
| C | -2.75432100 | 0.45552800  | 2.31500000  |
| C | -3.88944600 | 0.44858100  | 1.50246000  |
| H | -4.72134900 | -0.19851900 | -0.37525500 |
| H | -2.64610700 | -1.25371100 | -1.15590200 |
| H | -0.69872200 | -0.17444600 | 2.51049300  |
| H | -2.78877400 | 0.92423300  | 3.29475300  |
| H | -4.81069700 | 0.91155800  | 1.84516300  |
| C | -0.22102100 | -1.44987500 | 0.27548600  |
| O | 0.44862000  | -1.95970300 | 1.17724700  |
| C | -0.12743400 | -2.15301700 | -1.10233600 |
| F | -0.89954300 | -3.26130300 | -1.08195600 |
| F | -0.54602900 | -1.41977200 | -2.15686900 |
| F | 1.12336800  | -2.54560700 | -1.36379400 |
| C | 0.97962100  | 0.28943500  | -0.48213500 |
| C | 1.86828000  | 2.16828500  | -1.37828600 |
| H | 1.87962200  | 3.09644900  | -1.92835900 |
| C | 2.86931600  | 1.49995200  | -0.75576100 |
| H | 3.91920800  | 1.73246200  | -0.66184400 |
| N | 0.72465000  | 1.41557300  | -1.19434900 |
| N | 2.30621500  | 0.36065300  | -0.21674300 |
| C | 3.08616400  | -0.63581400 | 0.51750300  |
| H | 3.90154000  | -0.96373600 | -0.13708600 |
| H | 2.42530300  | -1.48417200 | 0.70017100  |
| C | -0.57359700 | 1.78120400  | -1.75004300 |
| H | -1.28639200 | 1.04066000  | -1.38689400 |
| H | -0.52000000 | 1.68793900  | -2.84112800 |
| C | 3.63908400  | -0.09531600 | 1.83288000  |
| H | 4.25360000  | -0.89172000 | 2.27038700  |
| H | 4.32160000  | 0.74348200  | 1.63890400  |
| C | 2.55674100  | 0.32536400  | 2.81865800  |
| H | 2.99665400  | 0.66169600  | 3.76275400  |
| H | 1.95572200  | 1.14954500  | 2.41920200  |
| H | 1.87979000  | -0.50903300 | 3.02741800  |
| C | -1.02033800 | 3.18509400  | -1.35530100 |
| H | -0.32914600 | 3.93030600  | -1.77043300 |
| H | -1.98213000 | 3.36285600  | -1.85200800 |
| C | -1.16554300 | 3.38313300  | 0.14762500  |
| H | -0.21241400 | 3.22760600  | 0.66389900  |
| H | -1.50630000 | 4.39790900  | 0.37530400  |
| H | -1.88871900 | 2.67836200  | 0.57029300  |
